# Supplementary material for: Looking inside ourselves: a culture of kindness
Source: PubMed Central journal article supplement (PMC6013138; doi:10.5195/jmla.2018.478), 2018-07-01

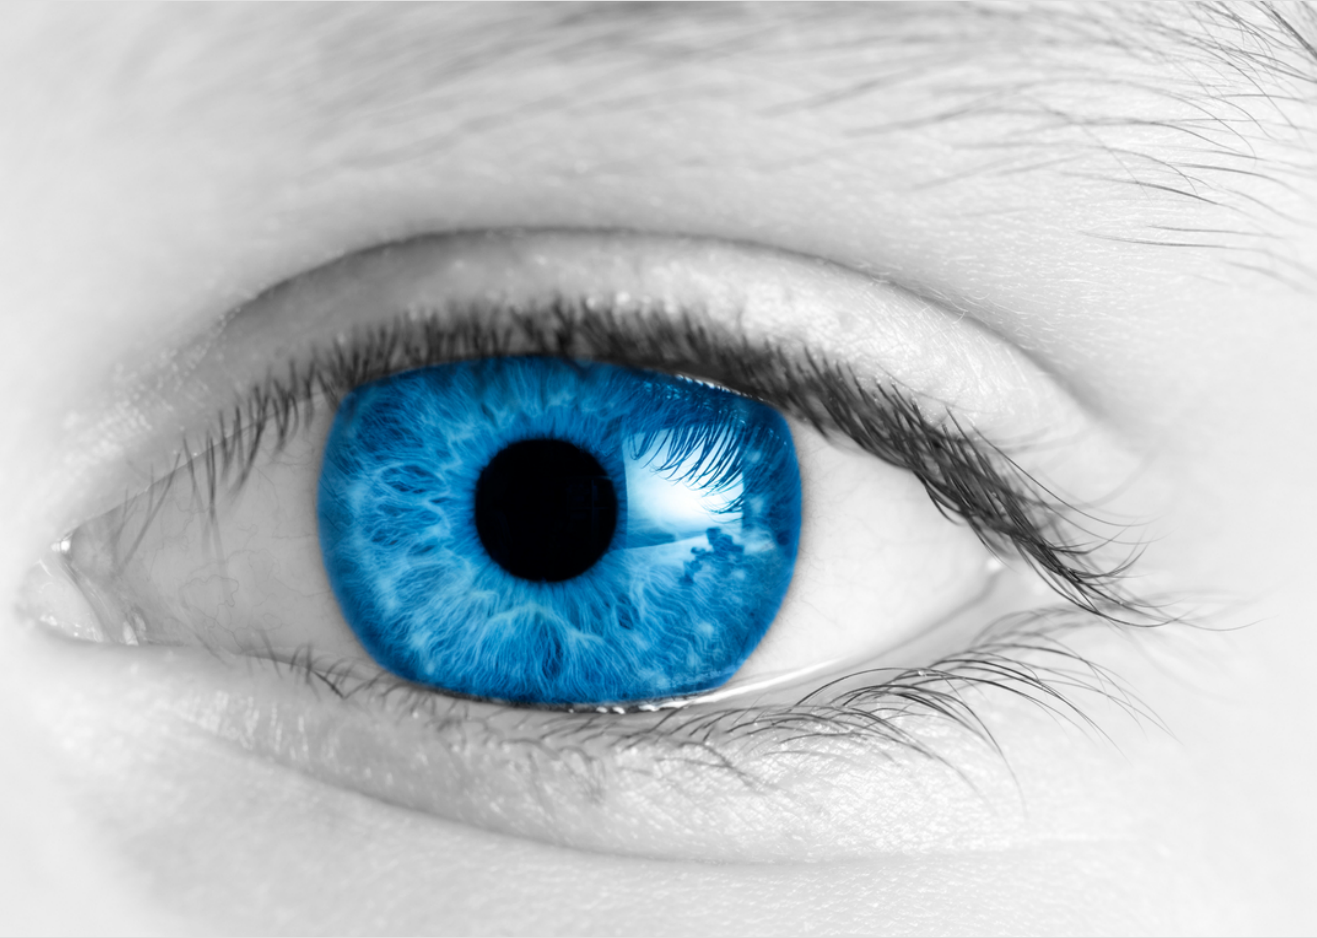

# Looking Inside Ourselves: A Culture of Kindness

Julia Sollenberger  
Director Emeritus  
Edward G. Miner Library  
University of Rochester



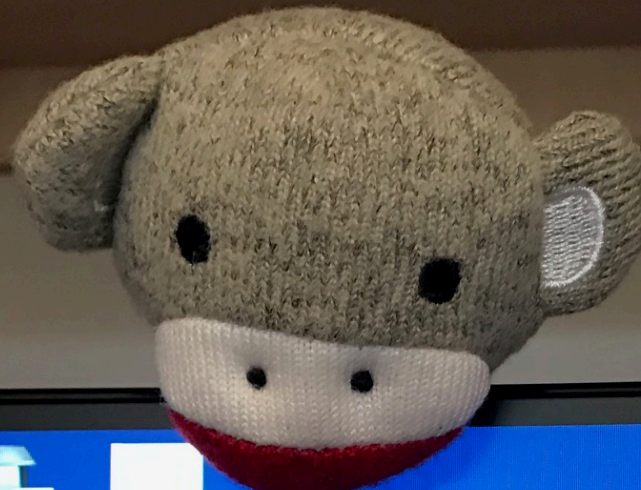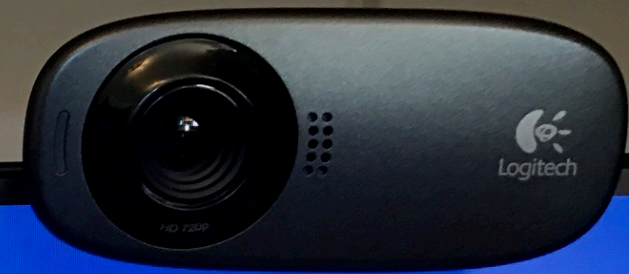

- Computer
- Canon Scan Utility
- SSFormWit...
- Recycle Bin
- EndNote
- 3-minute guided me...
- Google Chrome
- Cisco AnyConne...
- Looking Inside.pptx
- Internet Explorer
- Box Sync
- Look Inside Ourselves\_S...
- M
- S
- ...

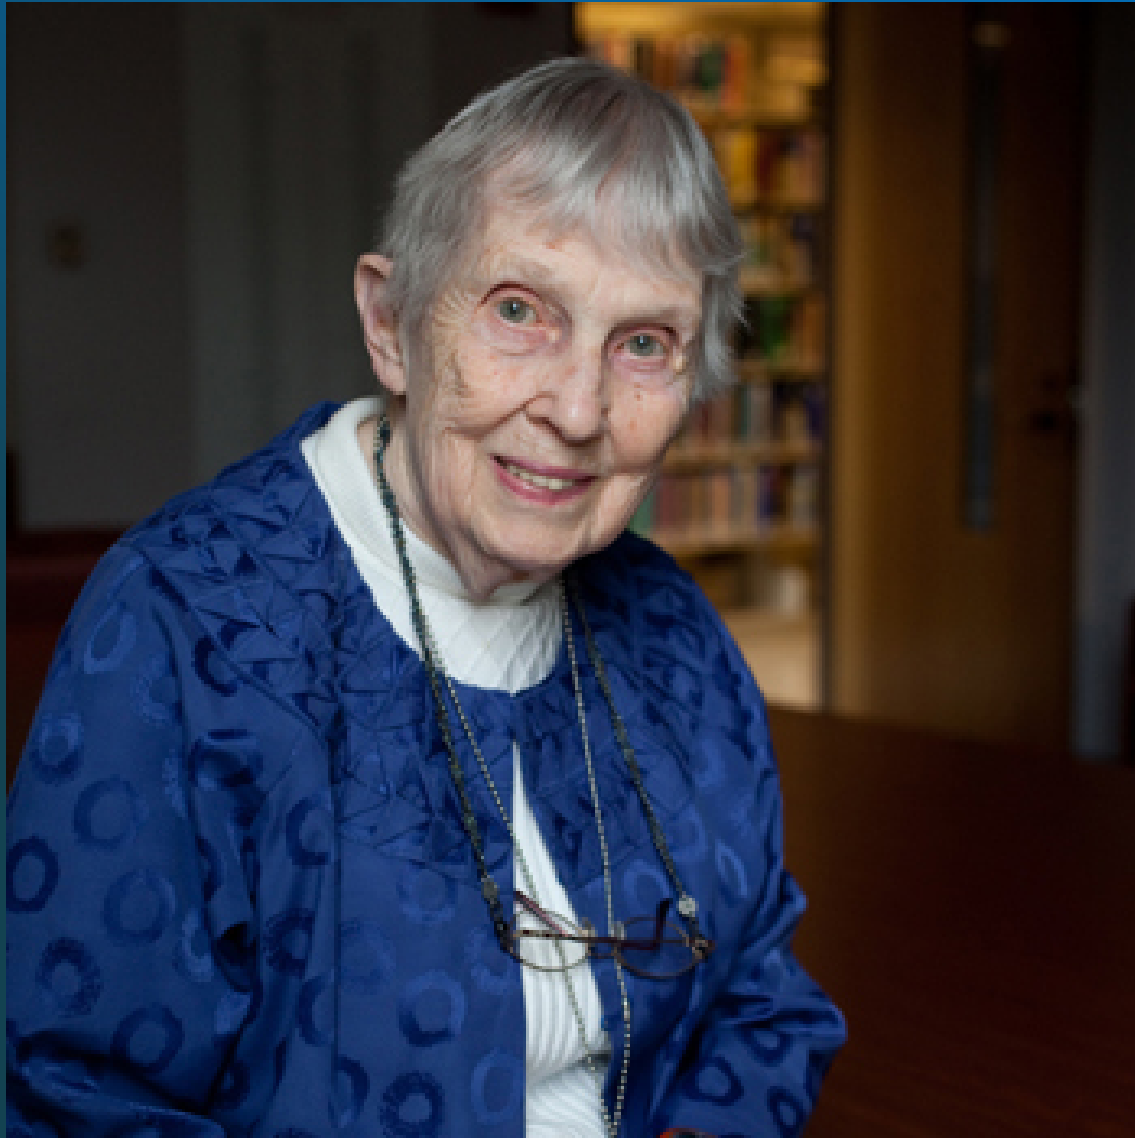



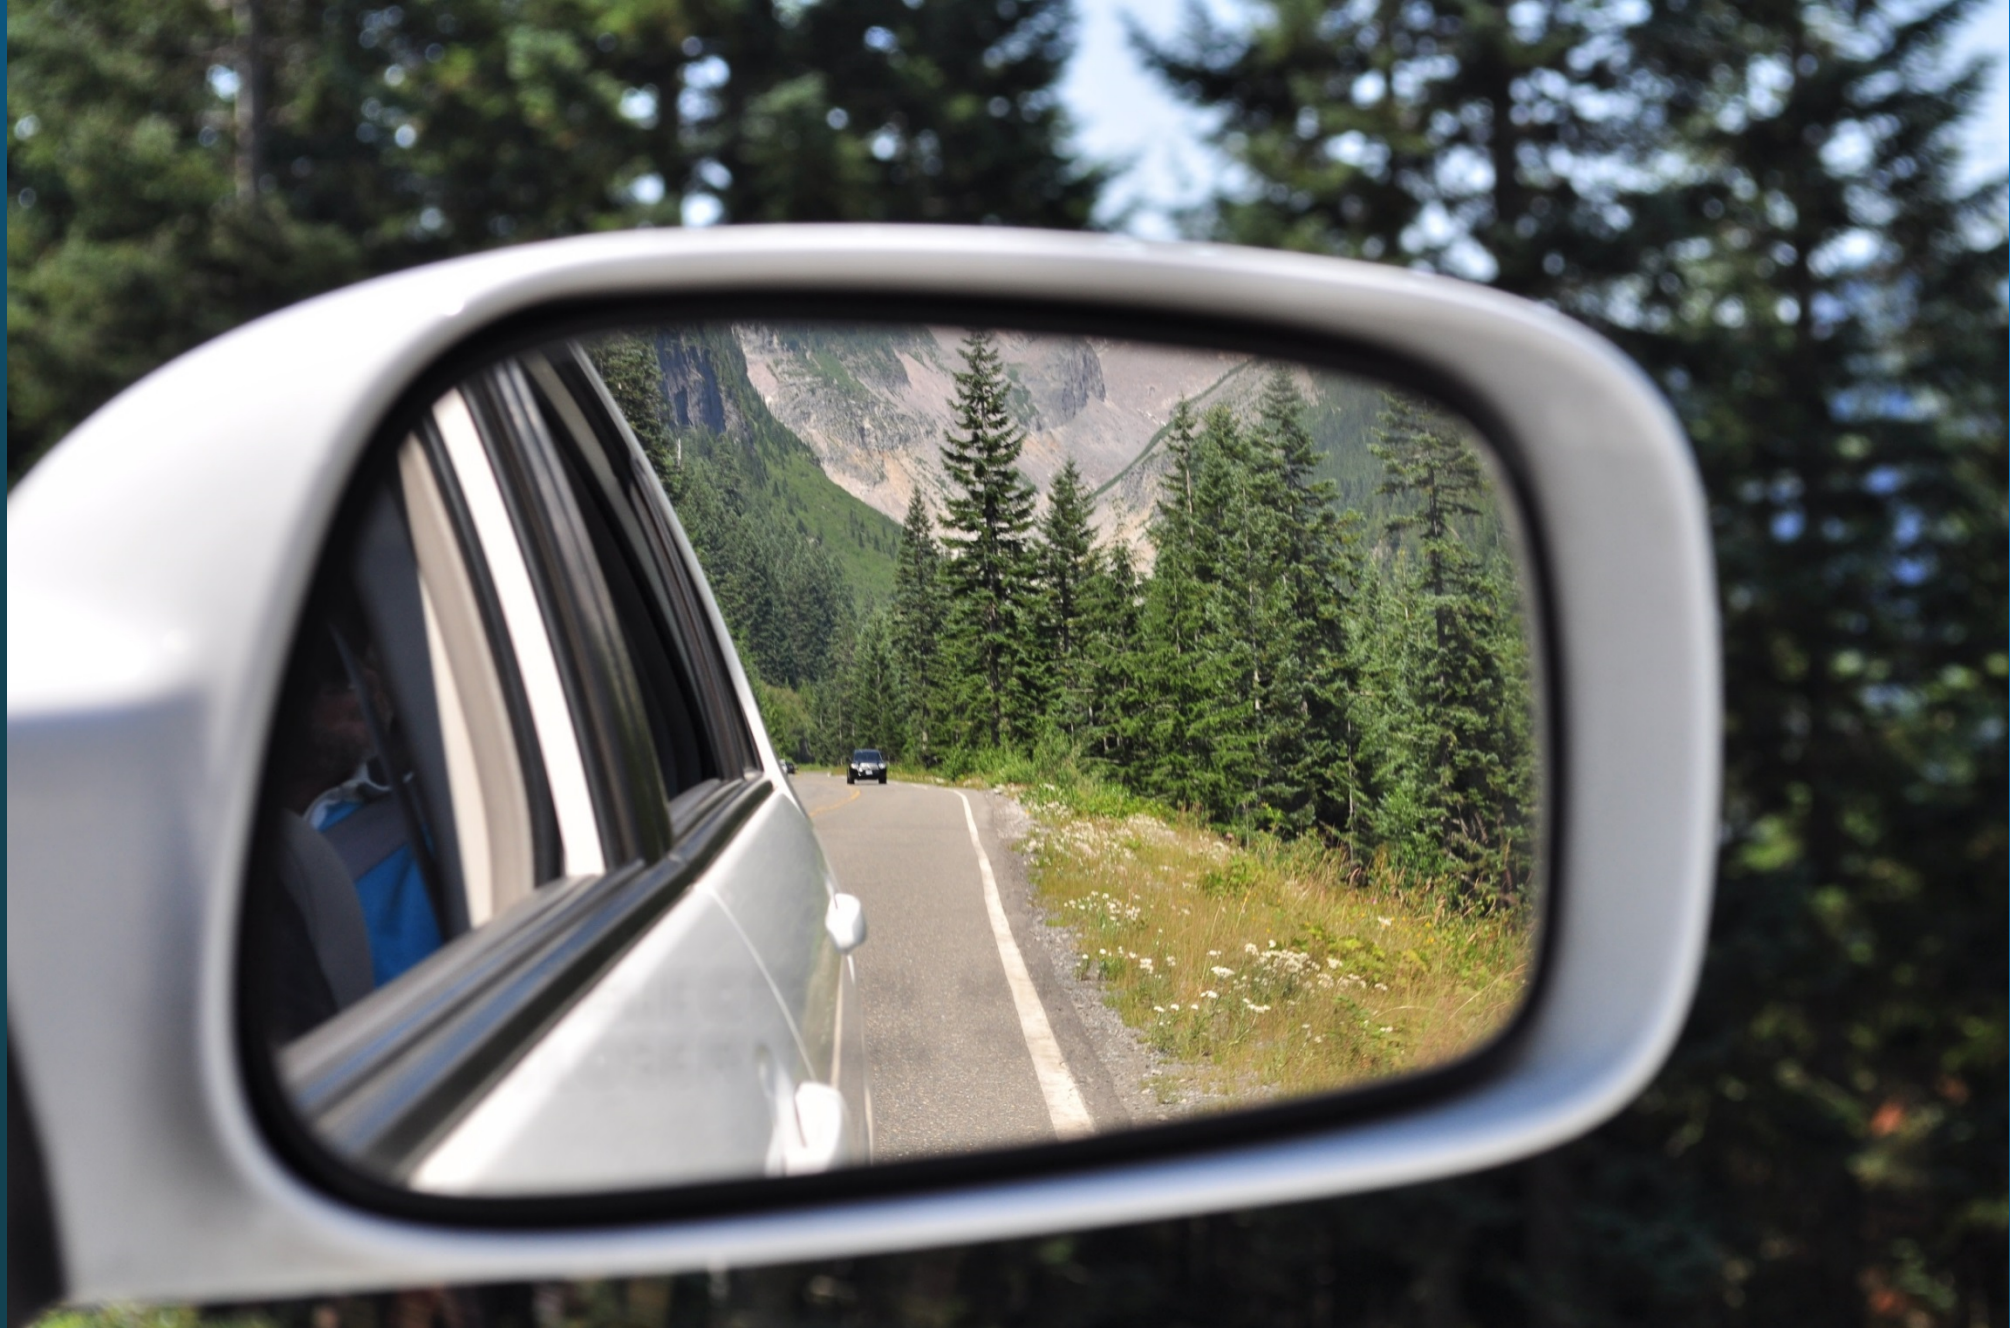

Photo by Joe Mabel, August 3, 2014



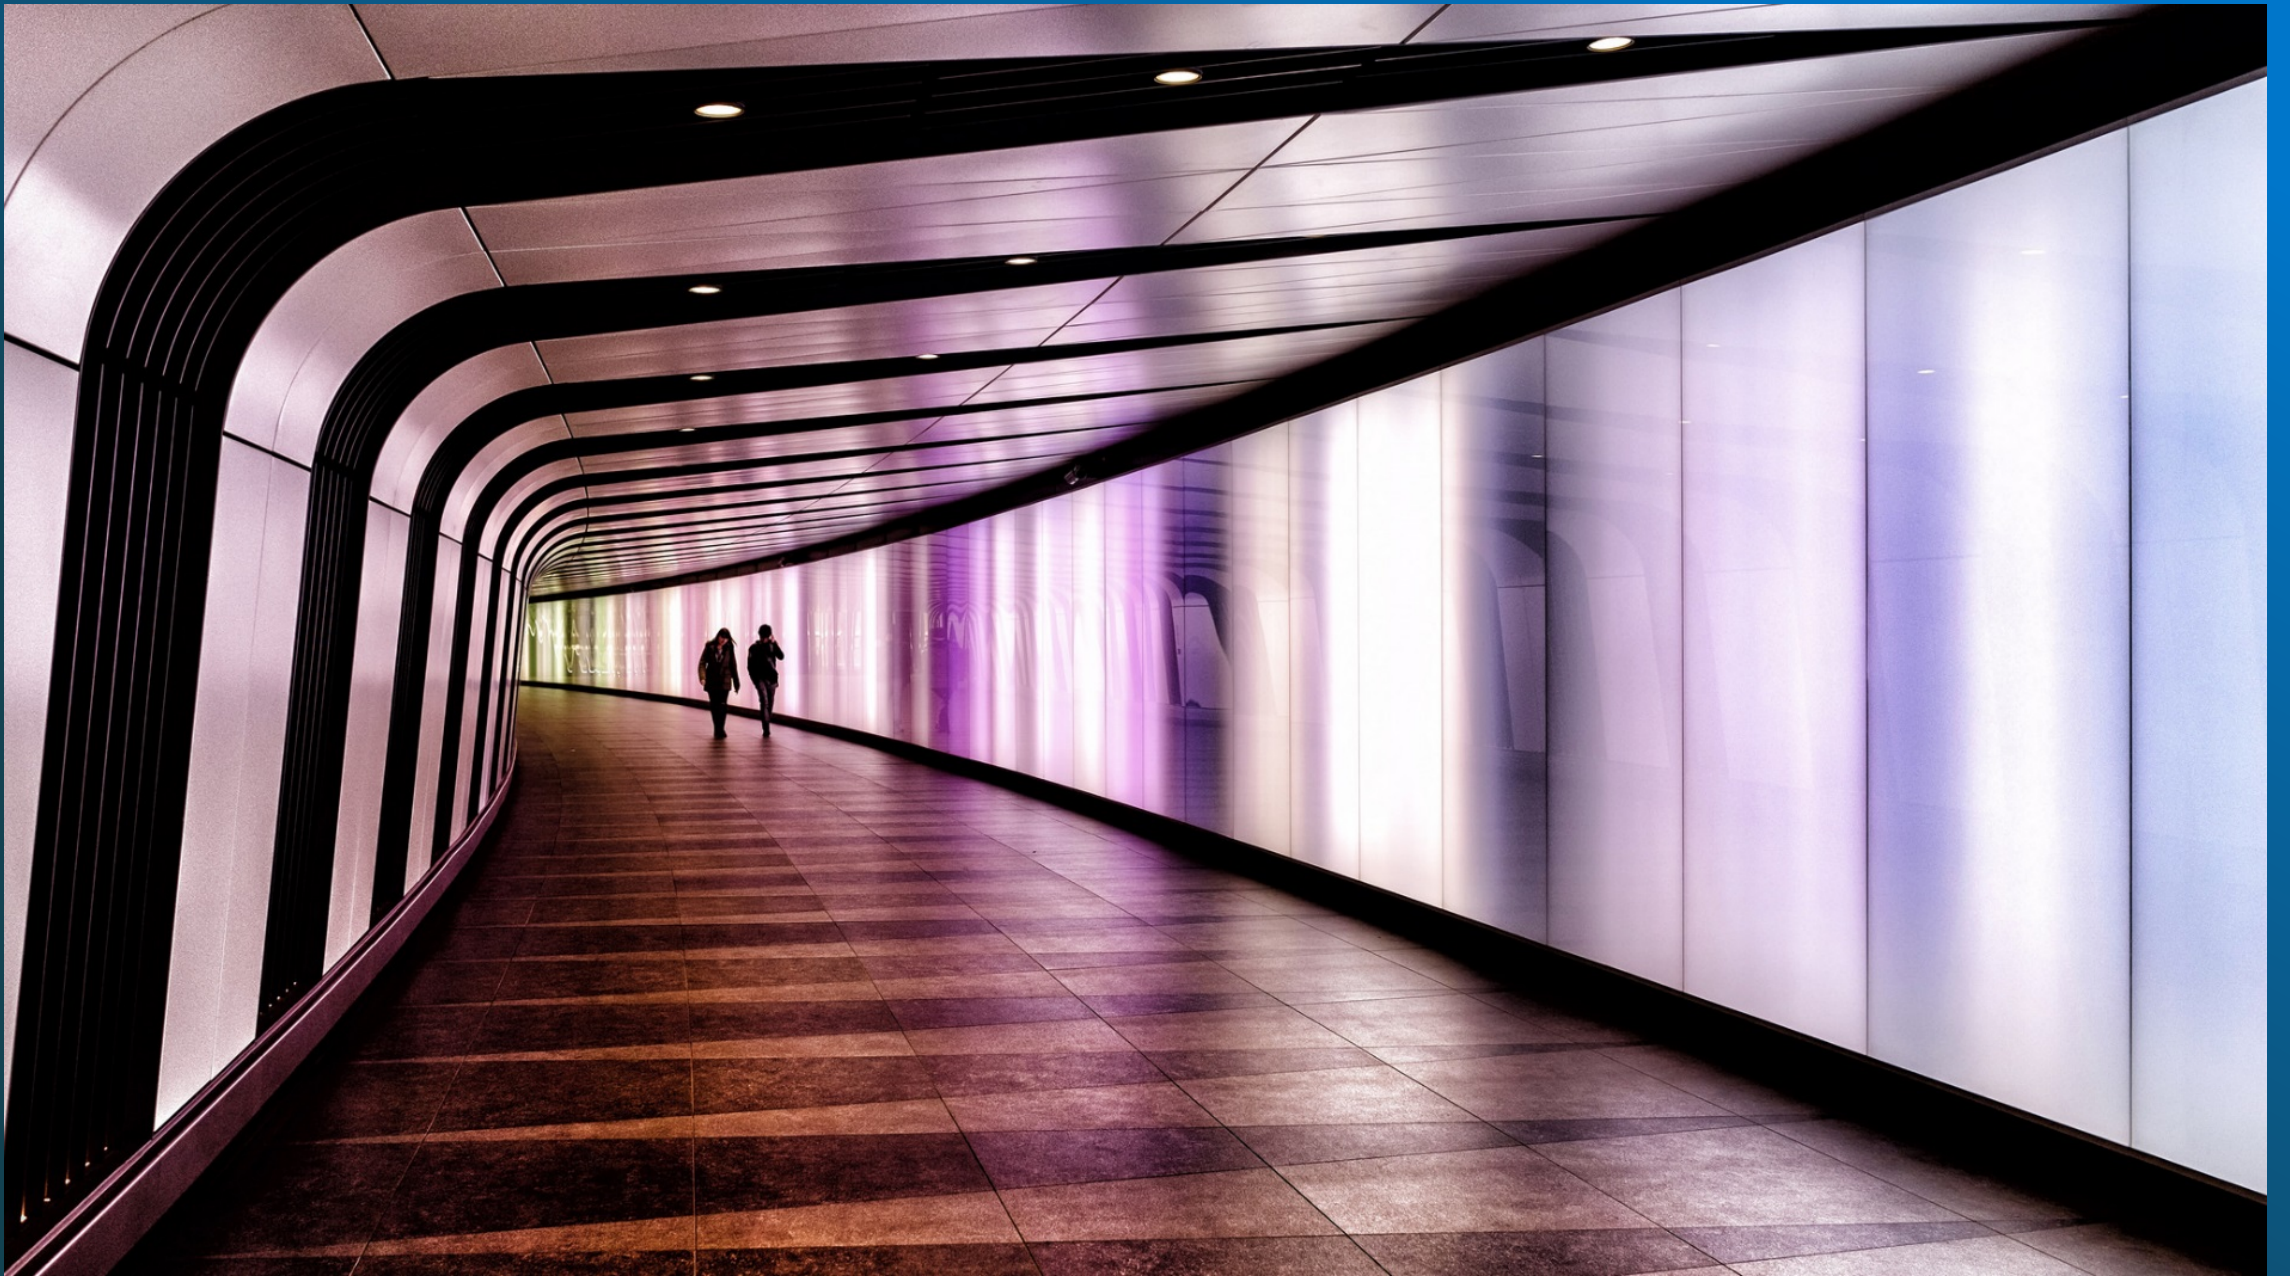

Photo by Dragan; November 23, 2015

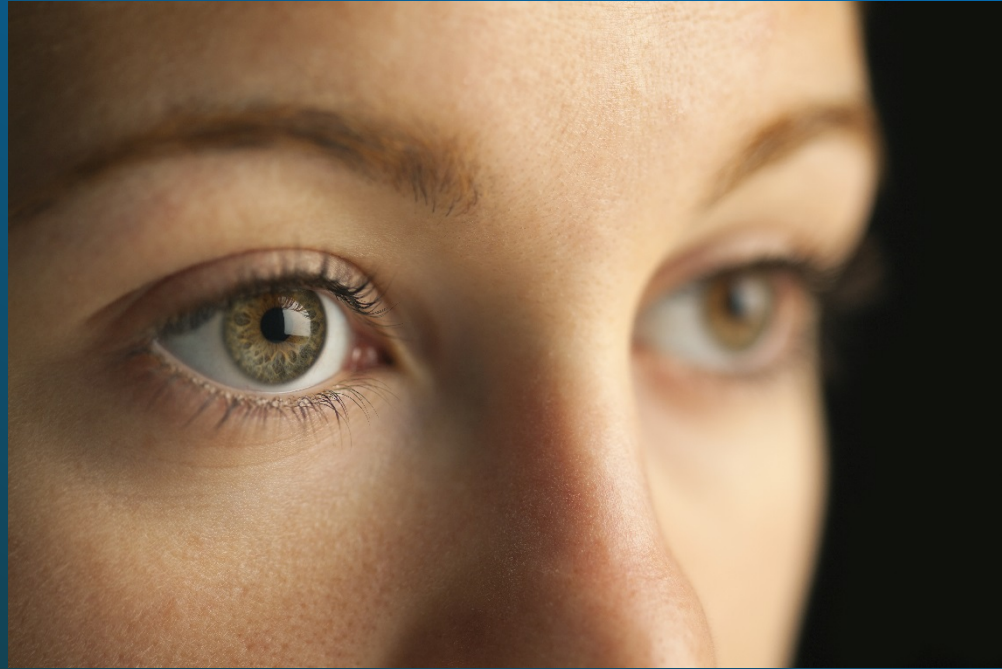

What lies behind us and what lies ahead of  
us are tiny matters to what lies within us.

-- Attributed to Ralph Waldo Emerson



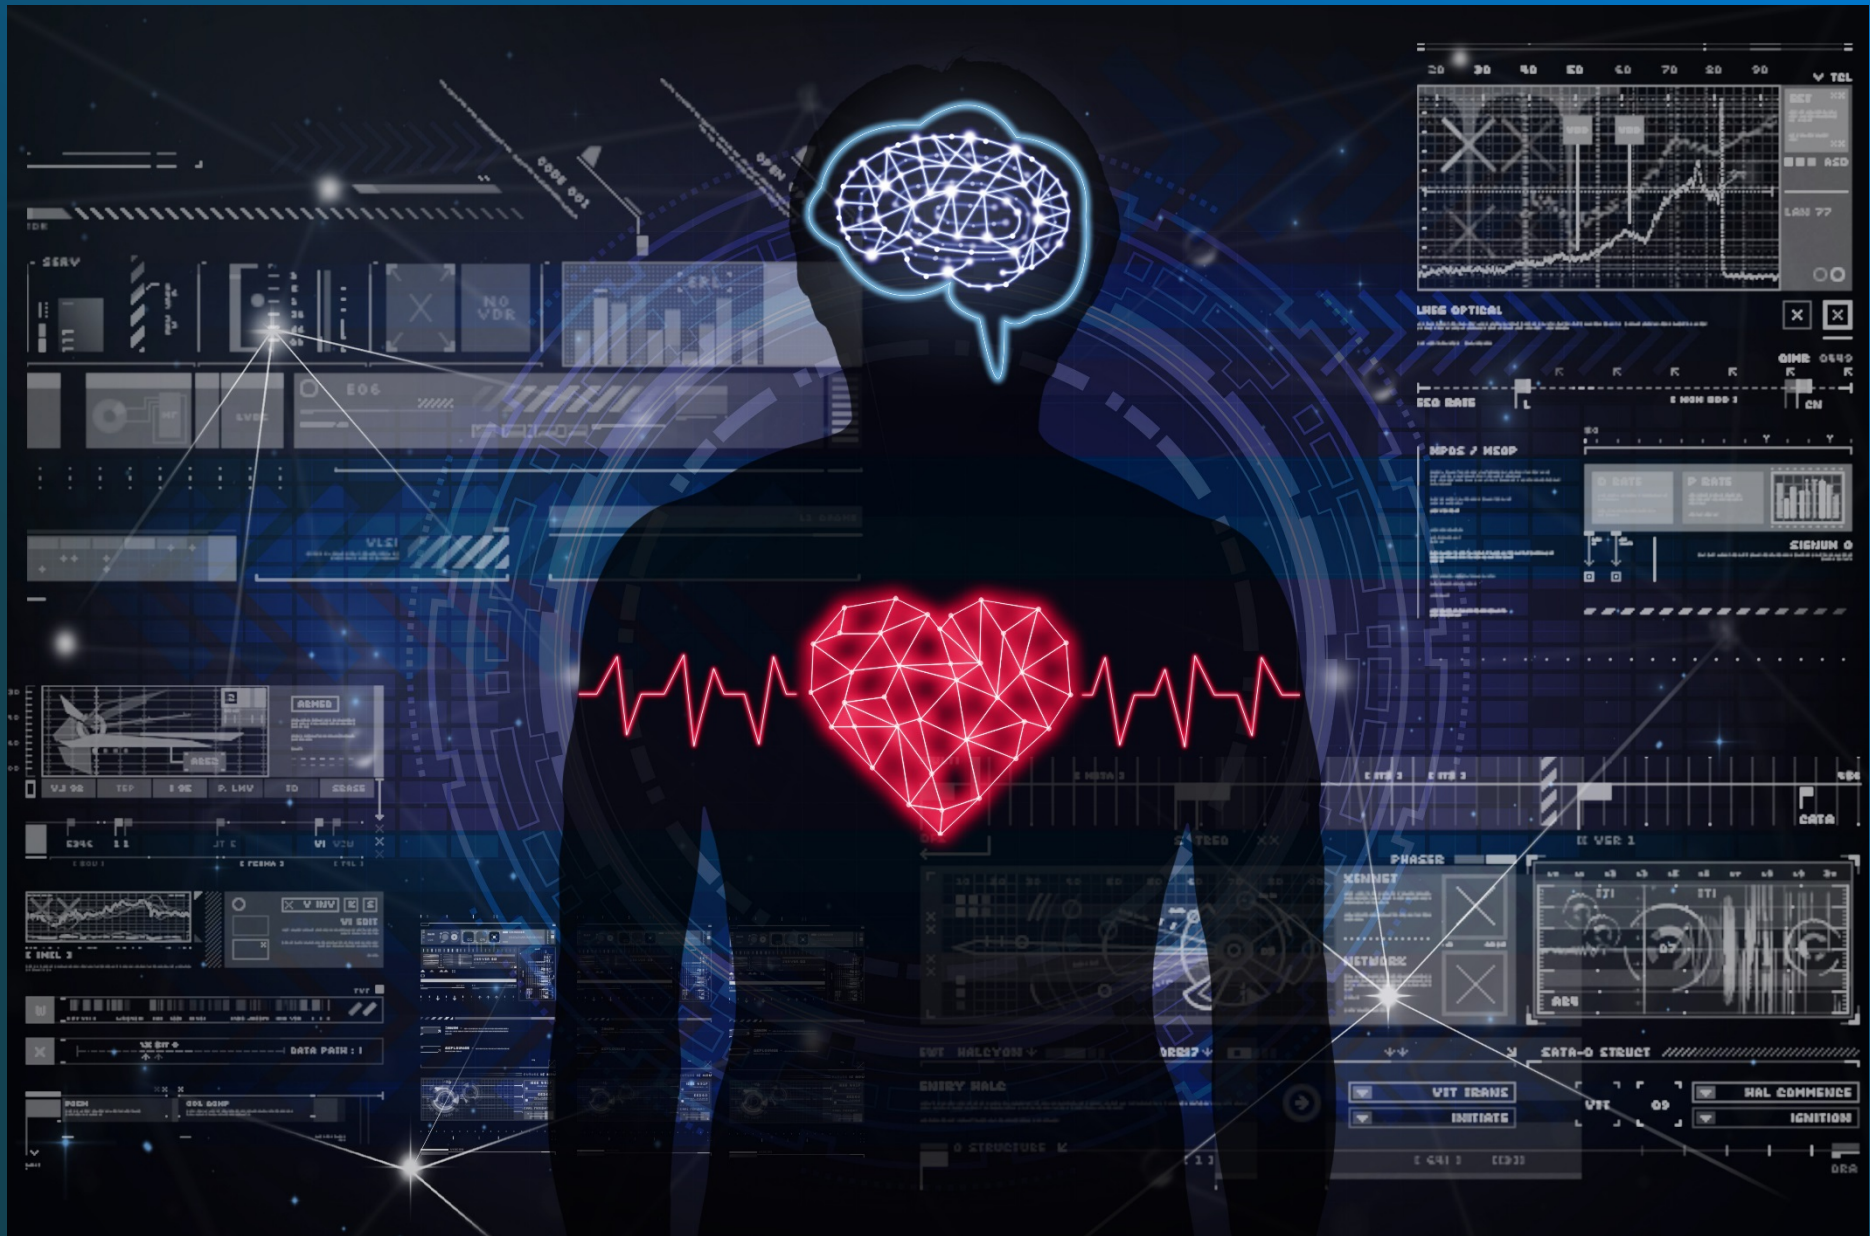



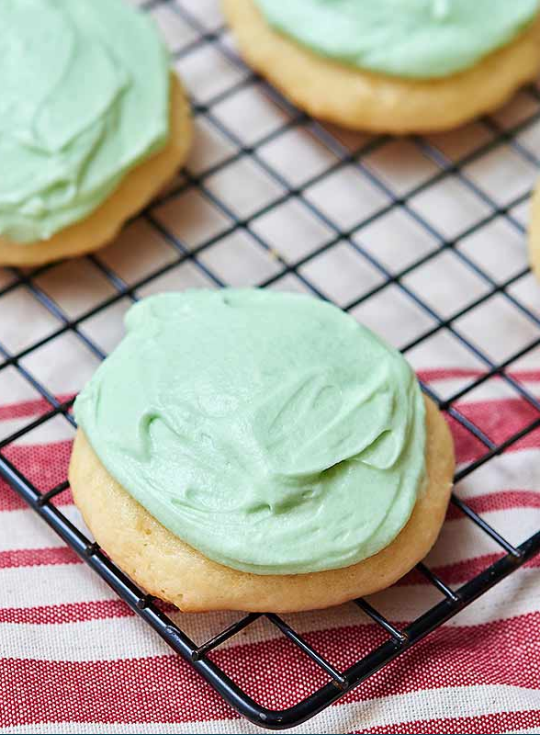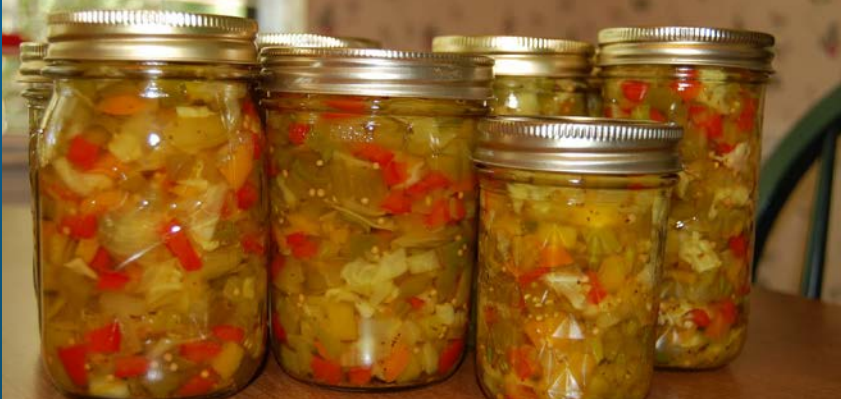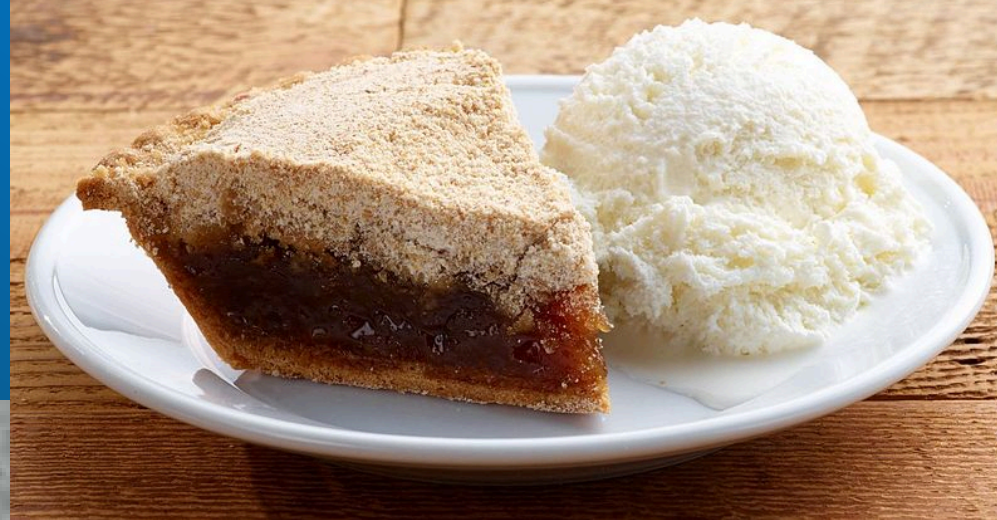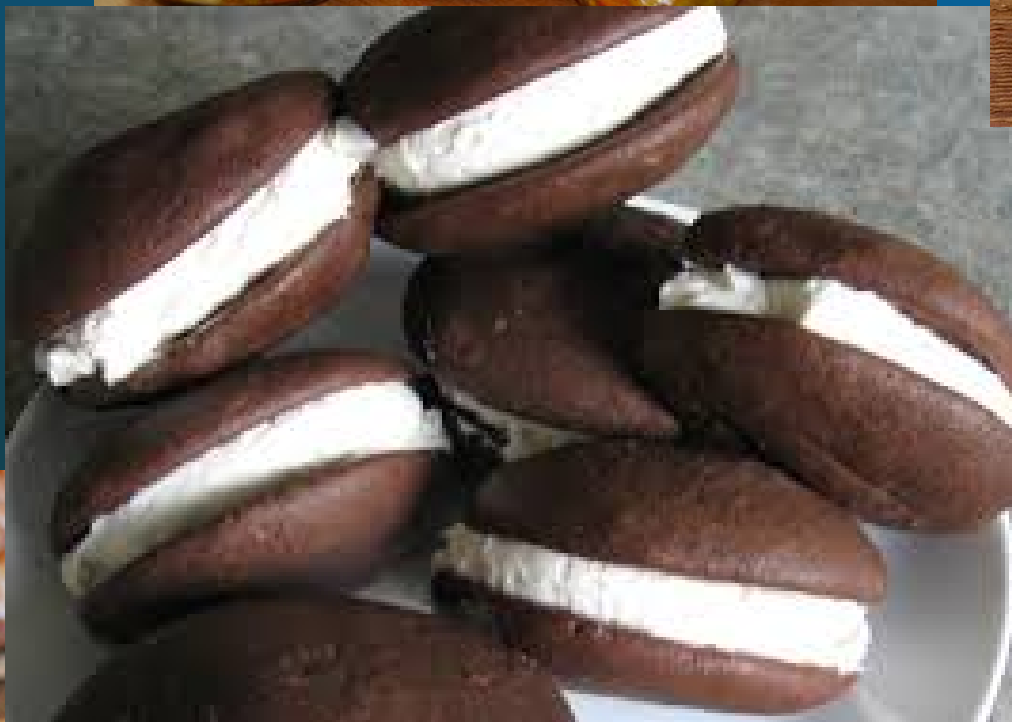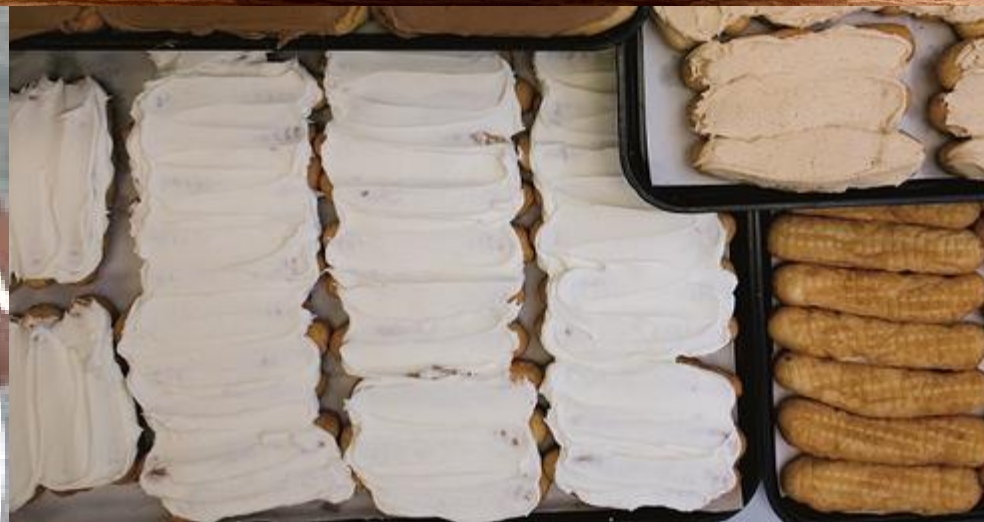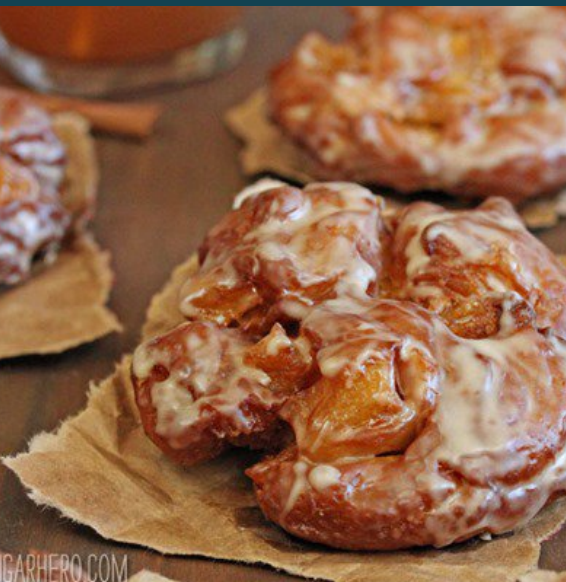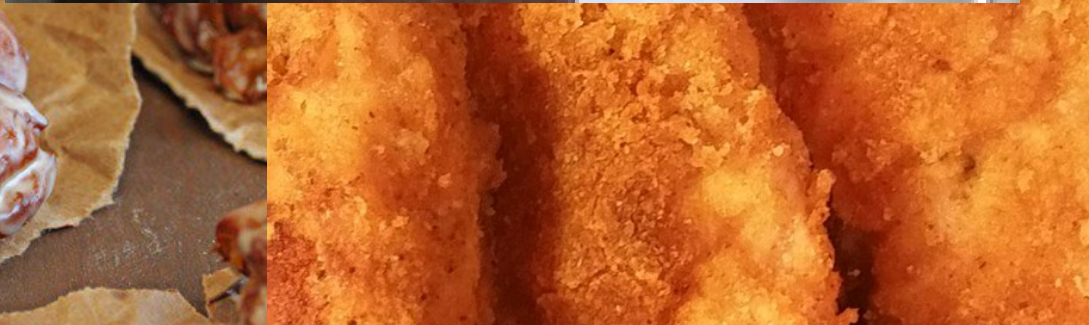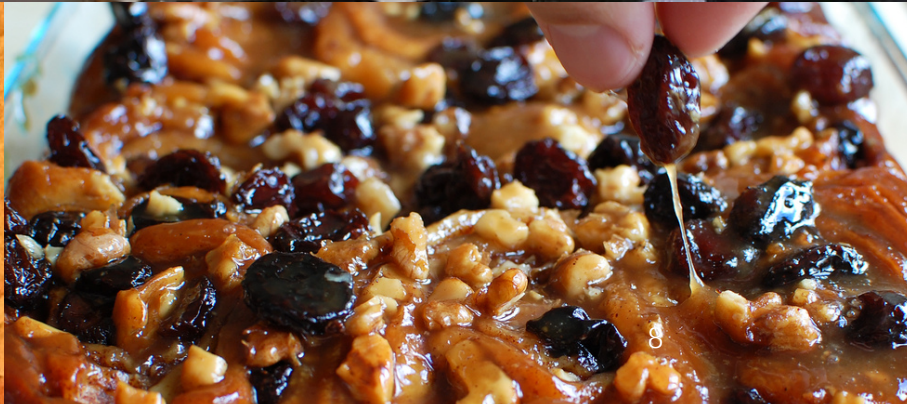



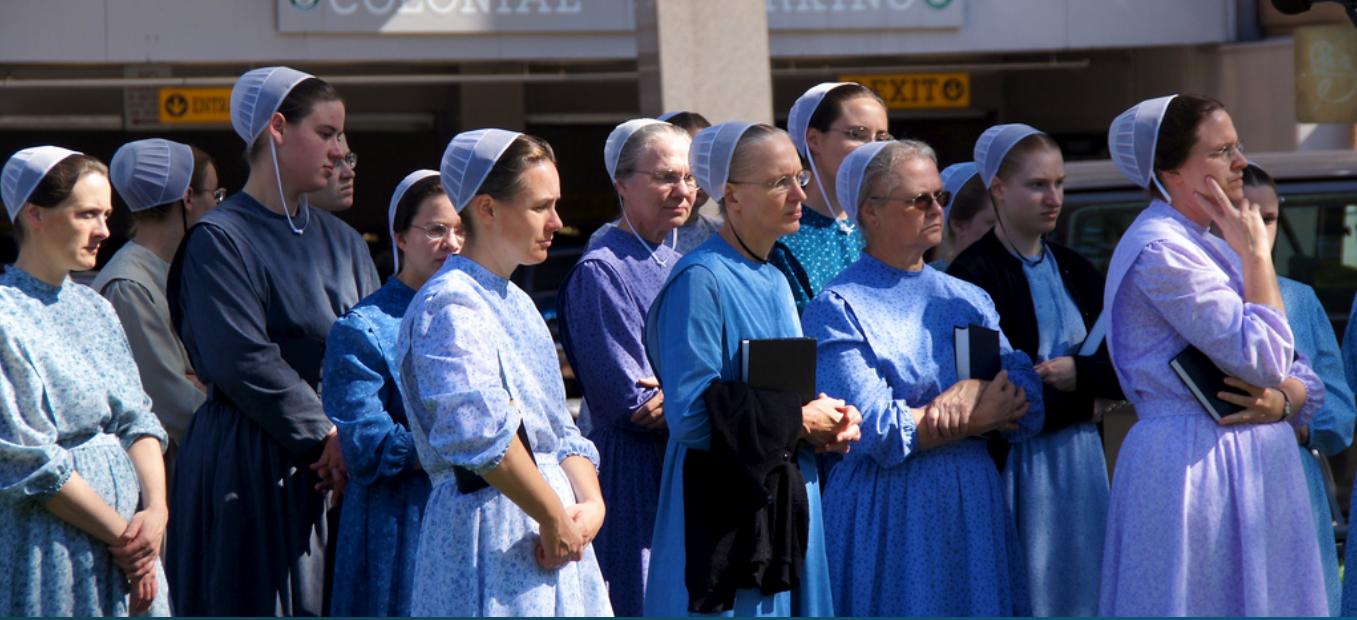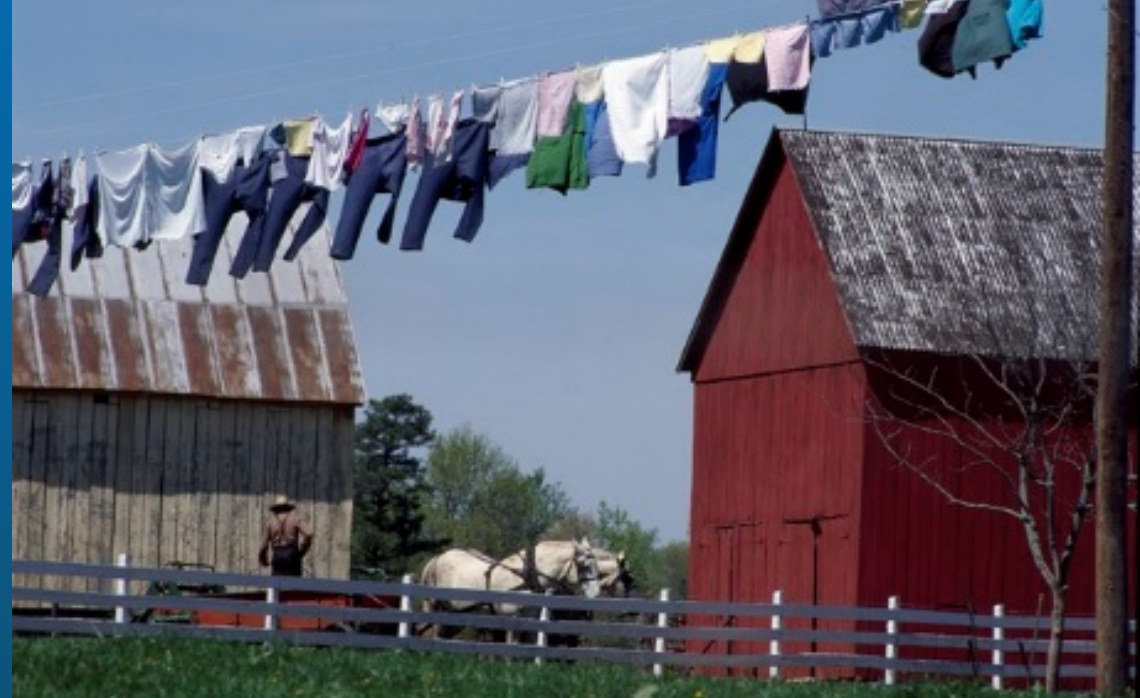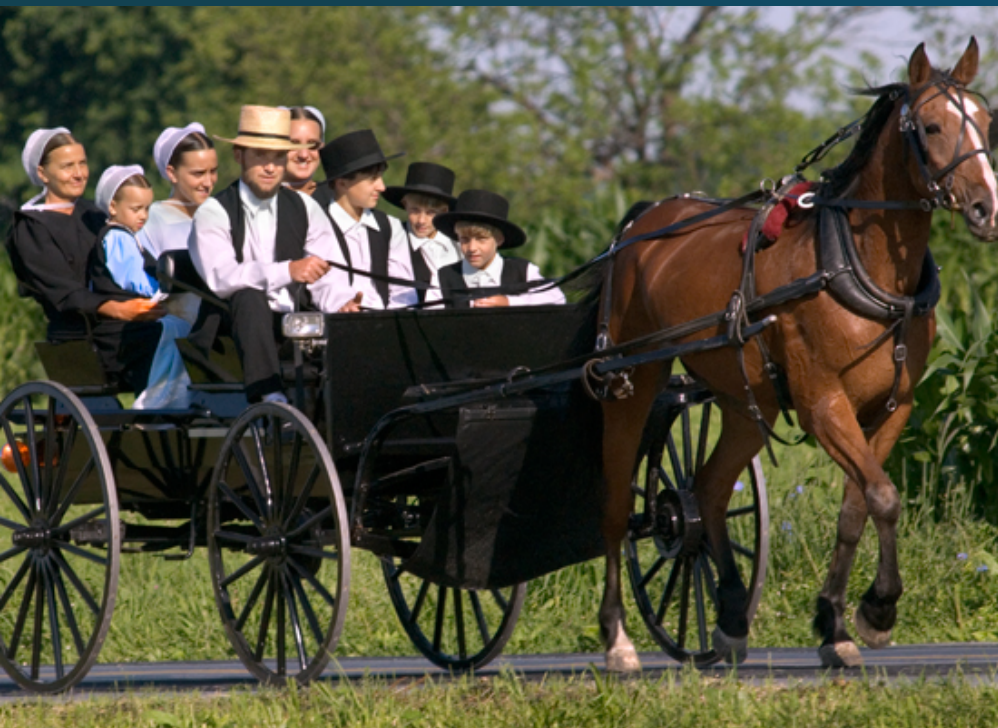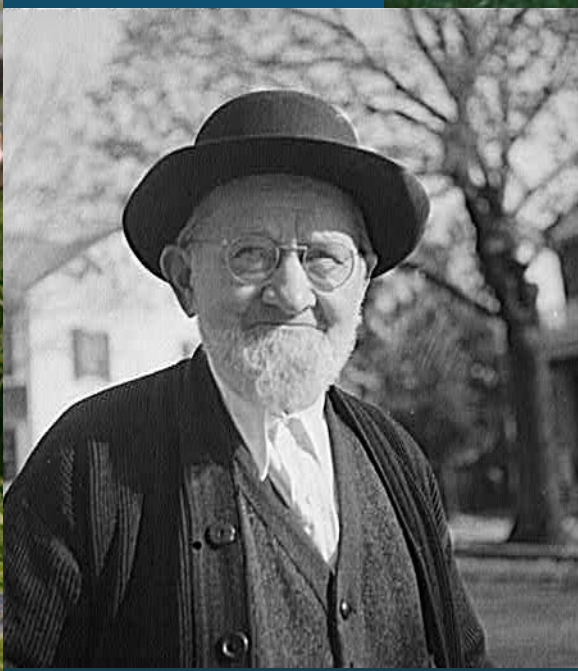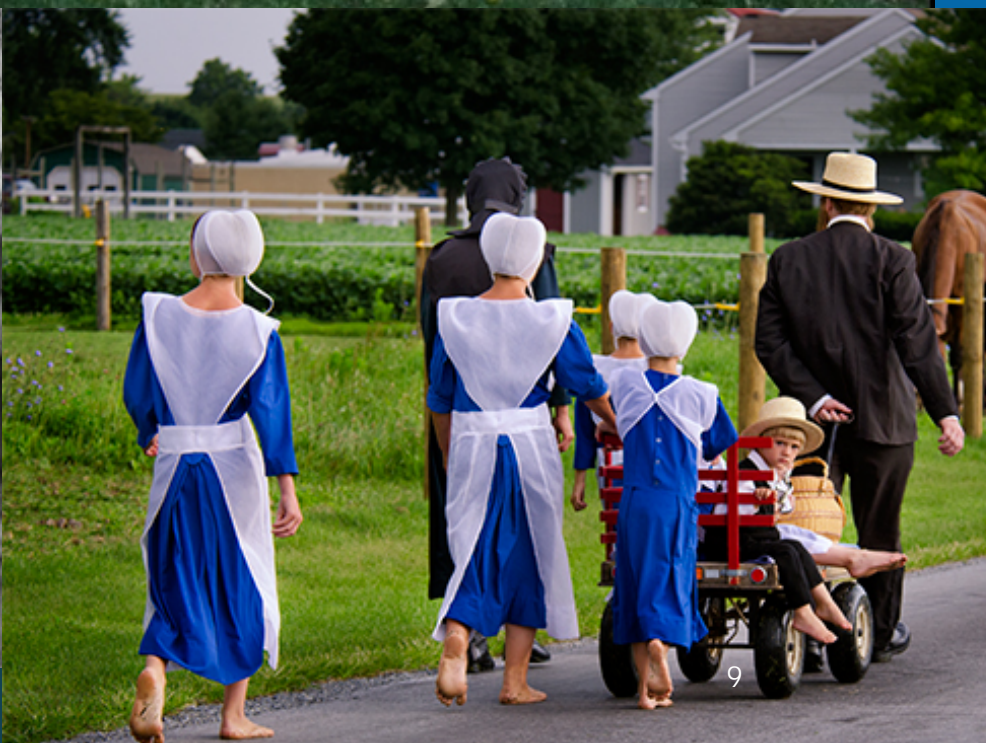



Why?

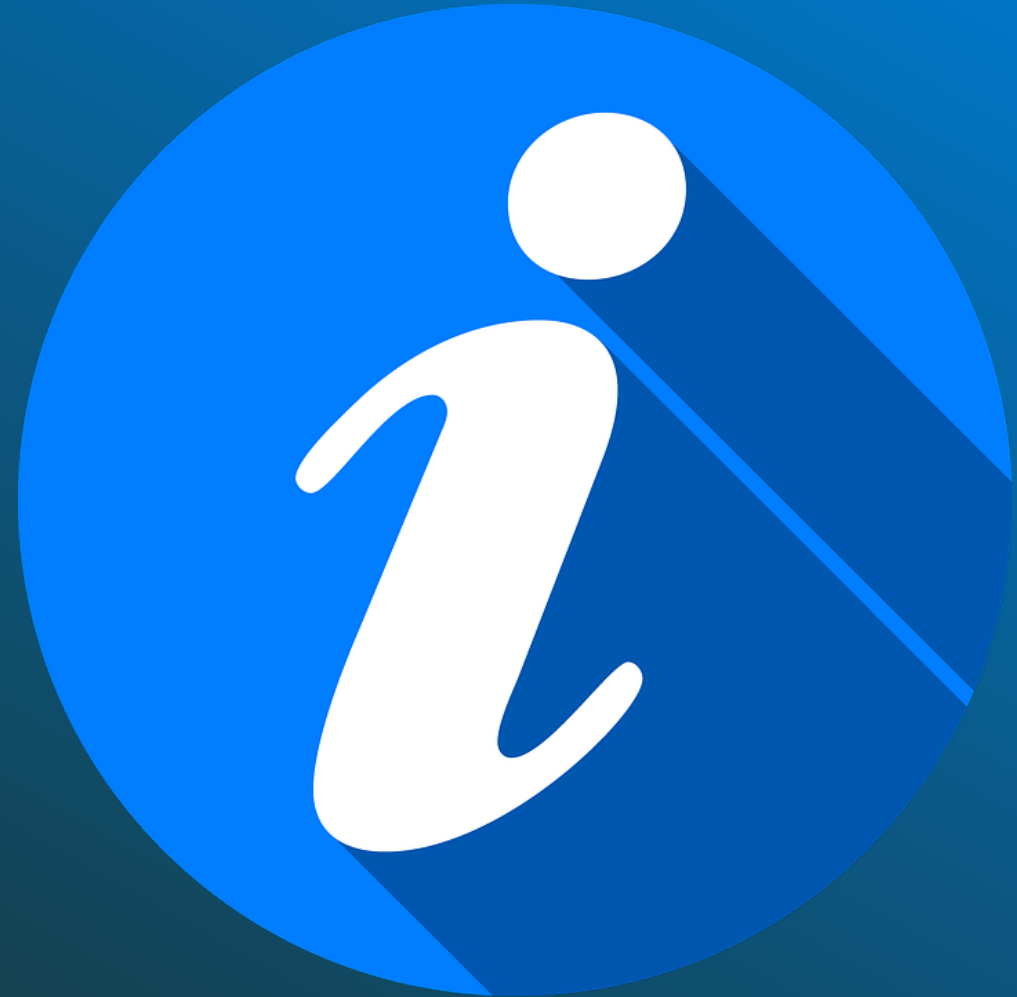



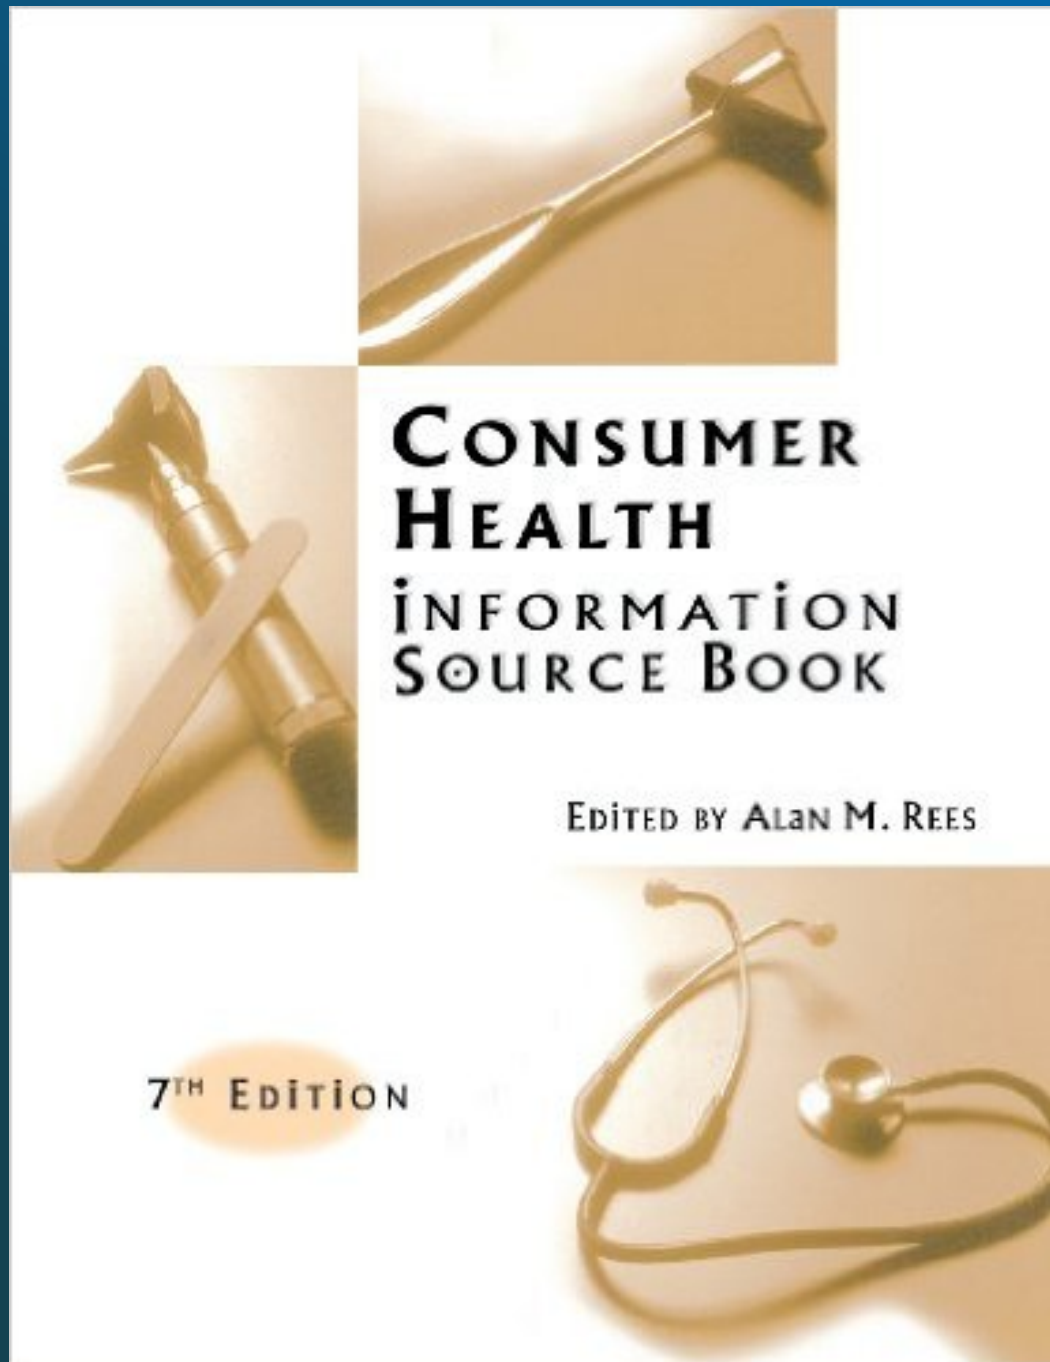

Alan Rees,  
"Communication in  
the Physician-Patient  
Relationship,"

Janet Doe Lecture,  
1992.

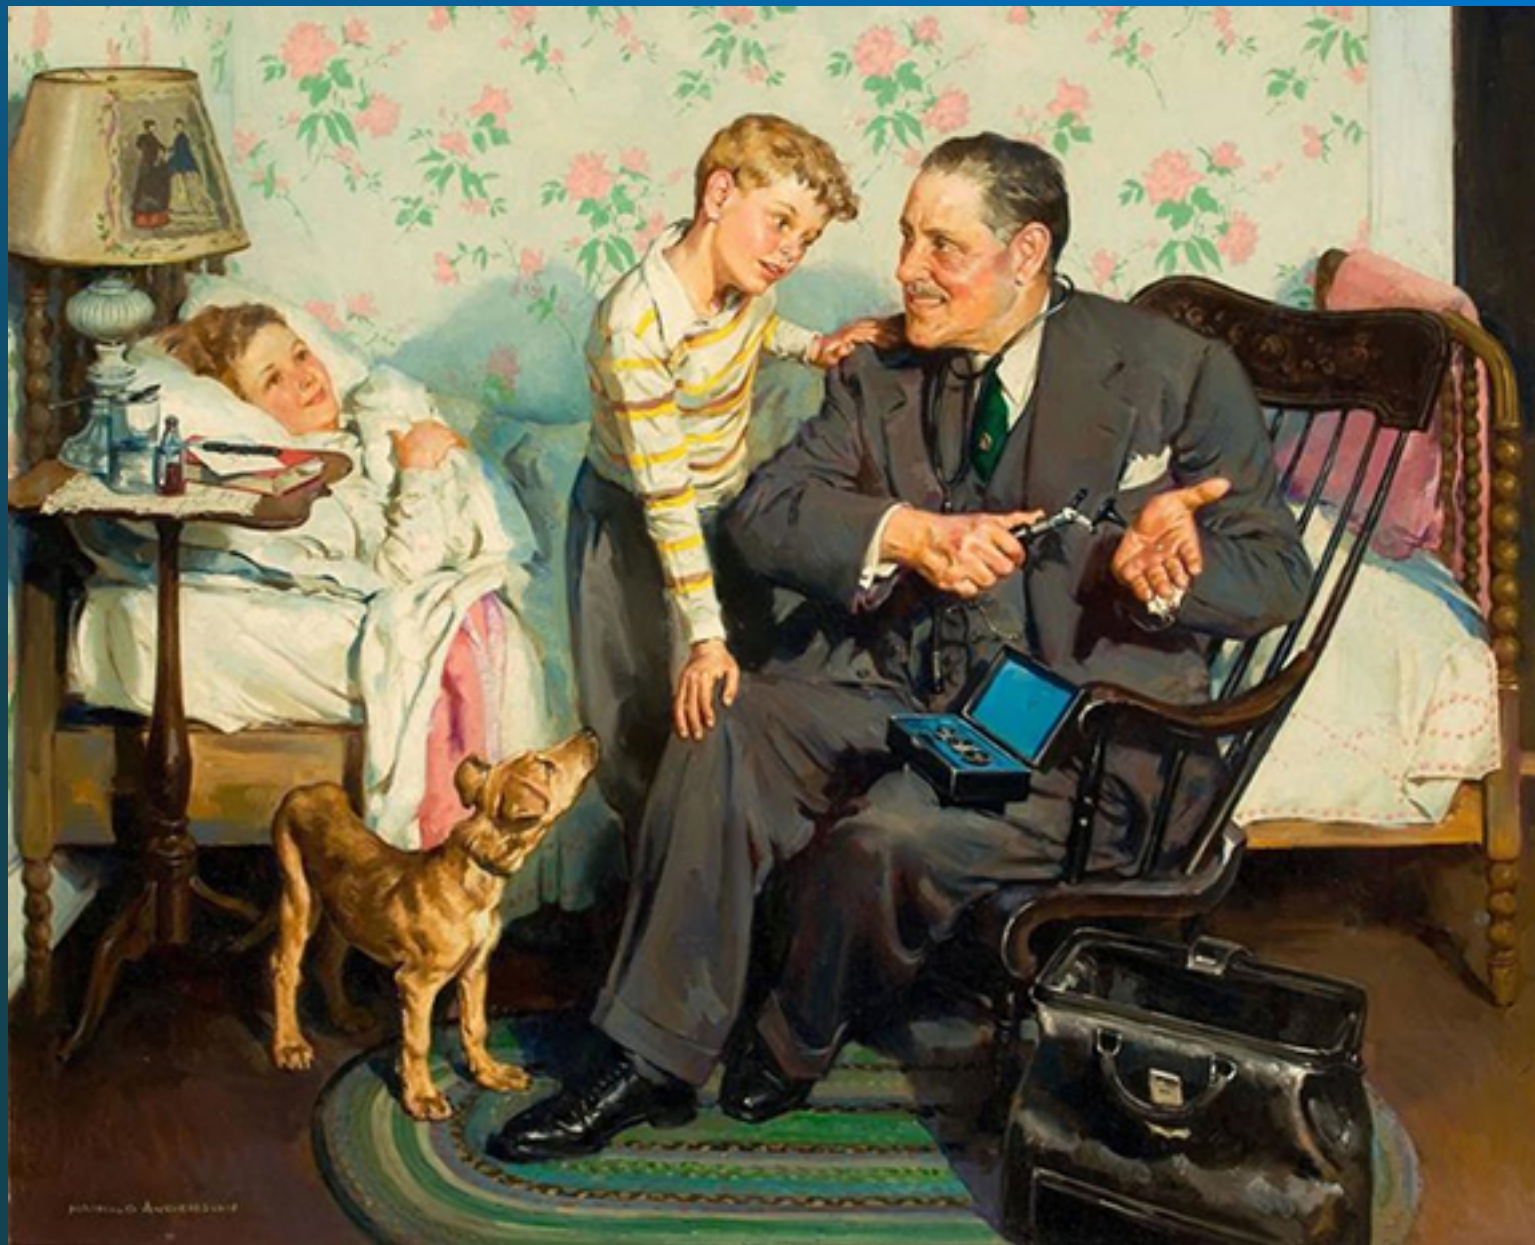

Illustration by Harold Anderson, 1894–1973



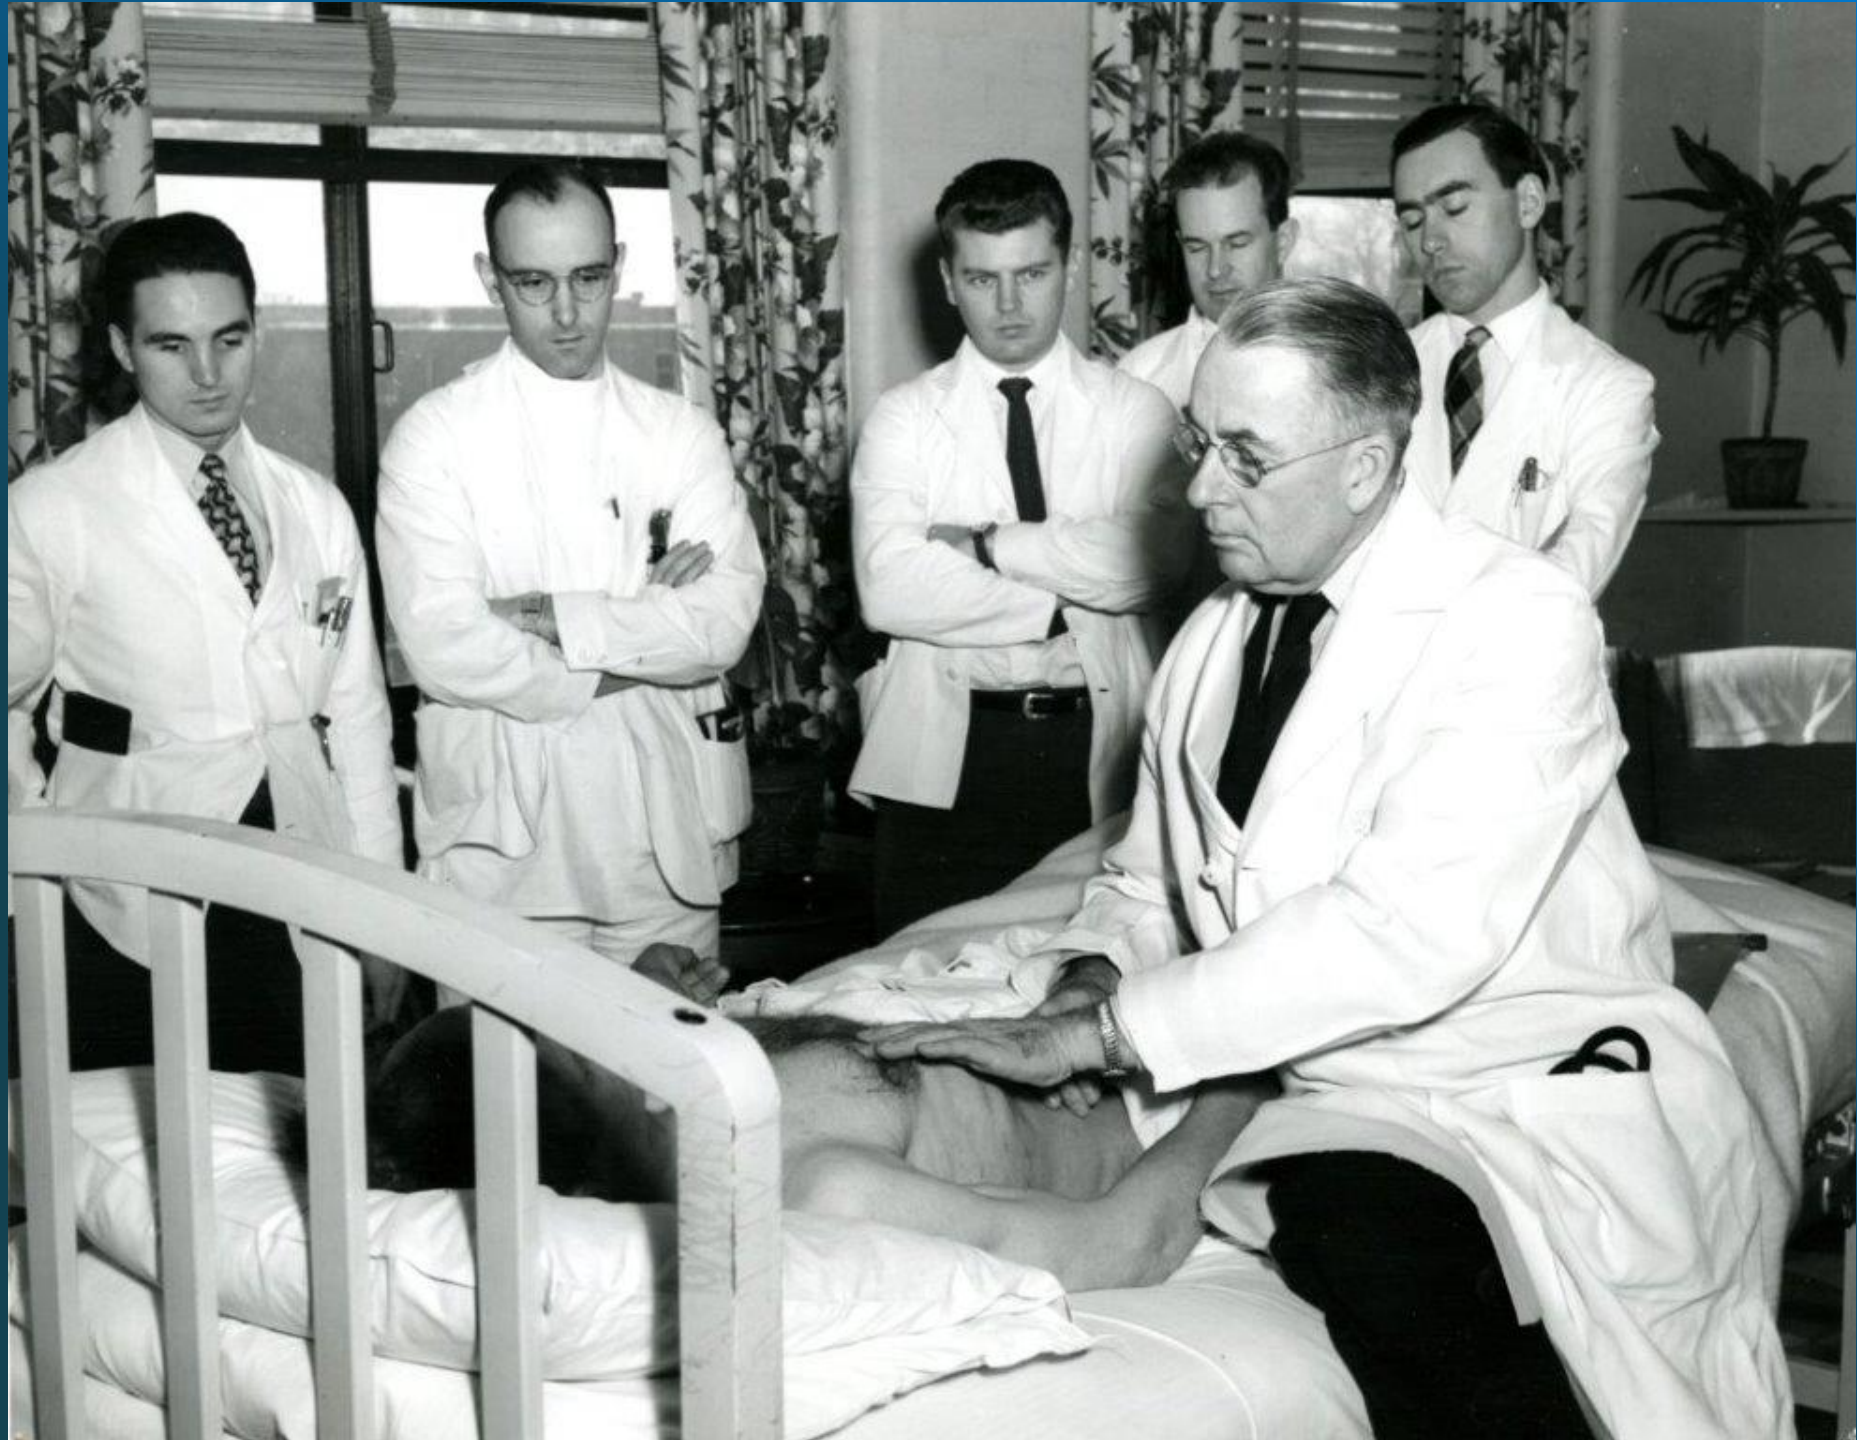

# Biopsychosocial (Bio-psycho-social) Model of Health and Disease

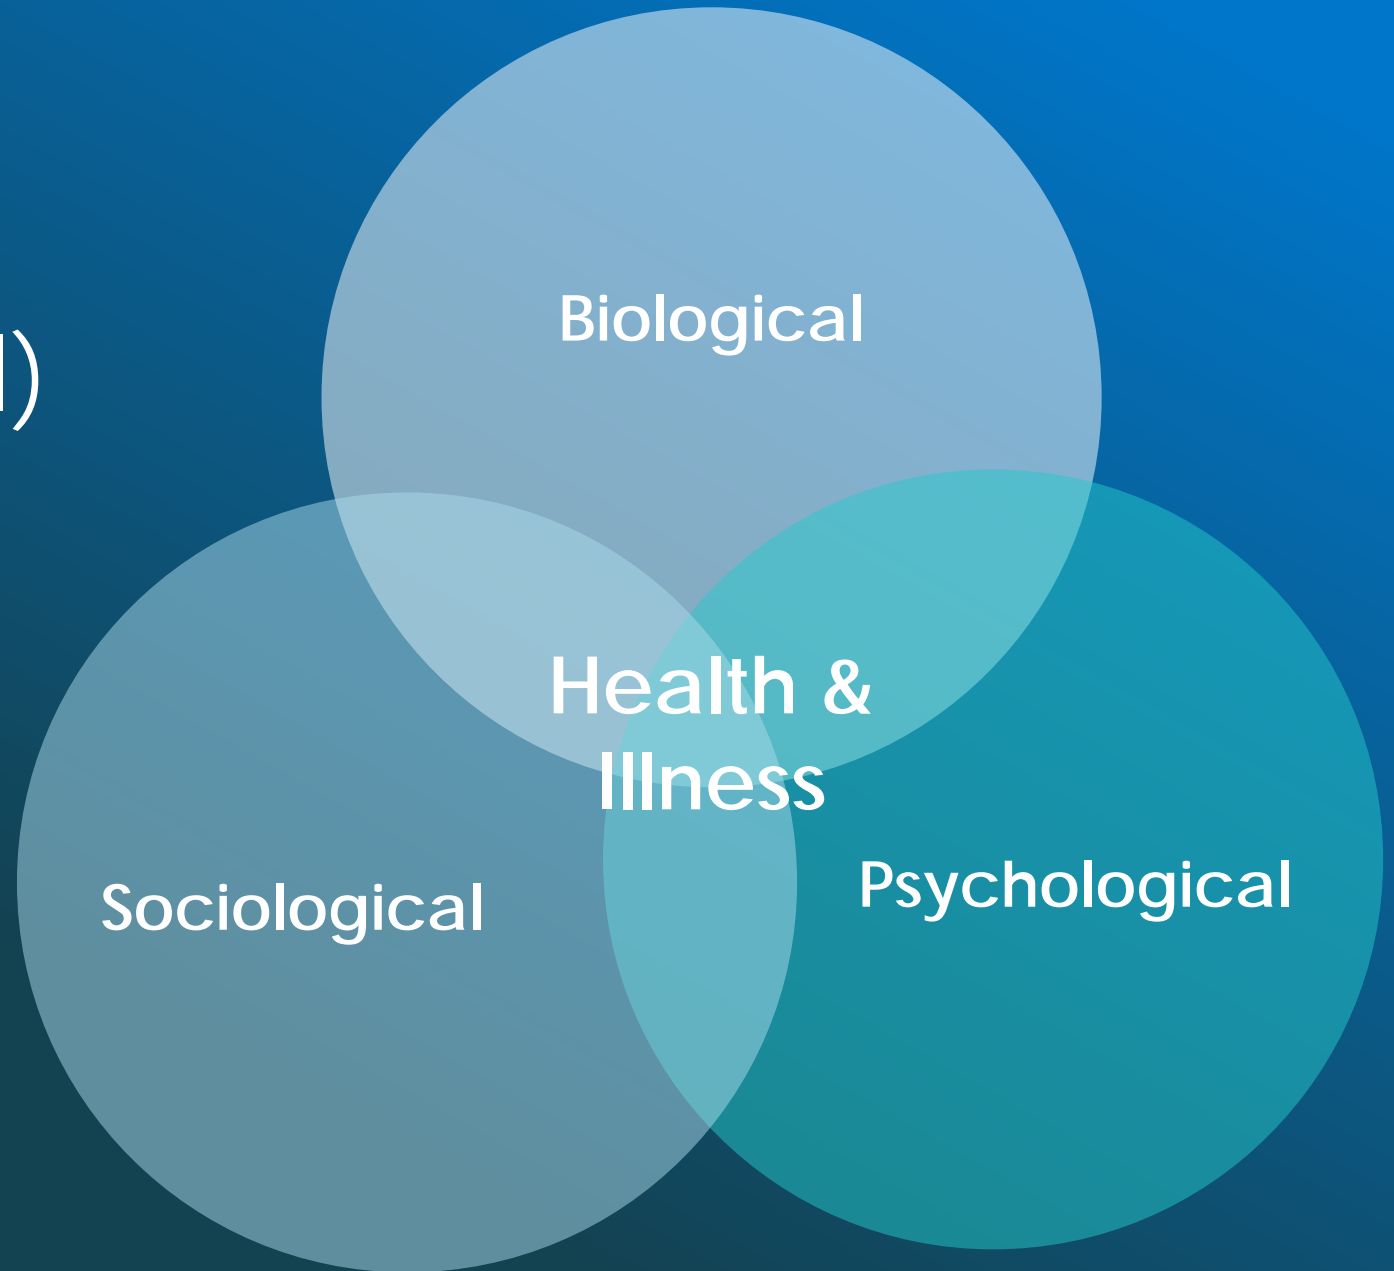



# Biopsychosocial Approach

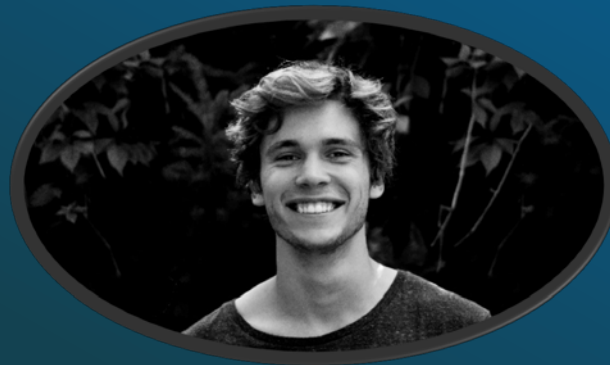

Person/Patient

Biosphere  
Society/Nation  
Culture  
Community  
Family  
Relationships

Nervous System  
Organs  
Tissues  
Cells  
Molecules  
Atoms

George  
Engel,  
MD

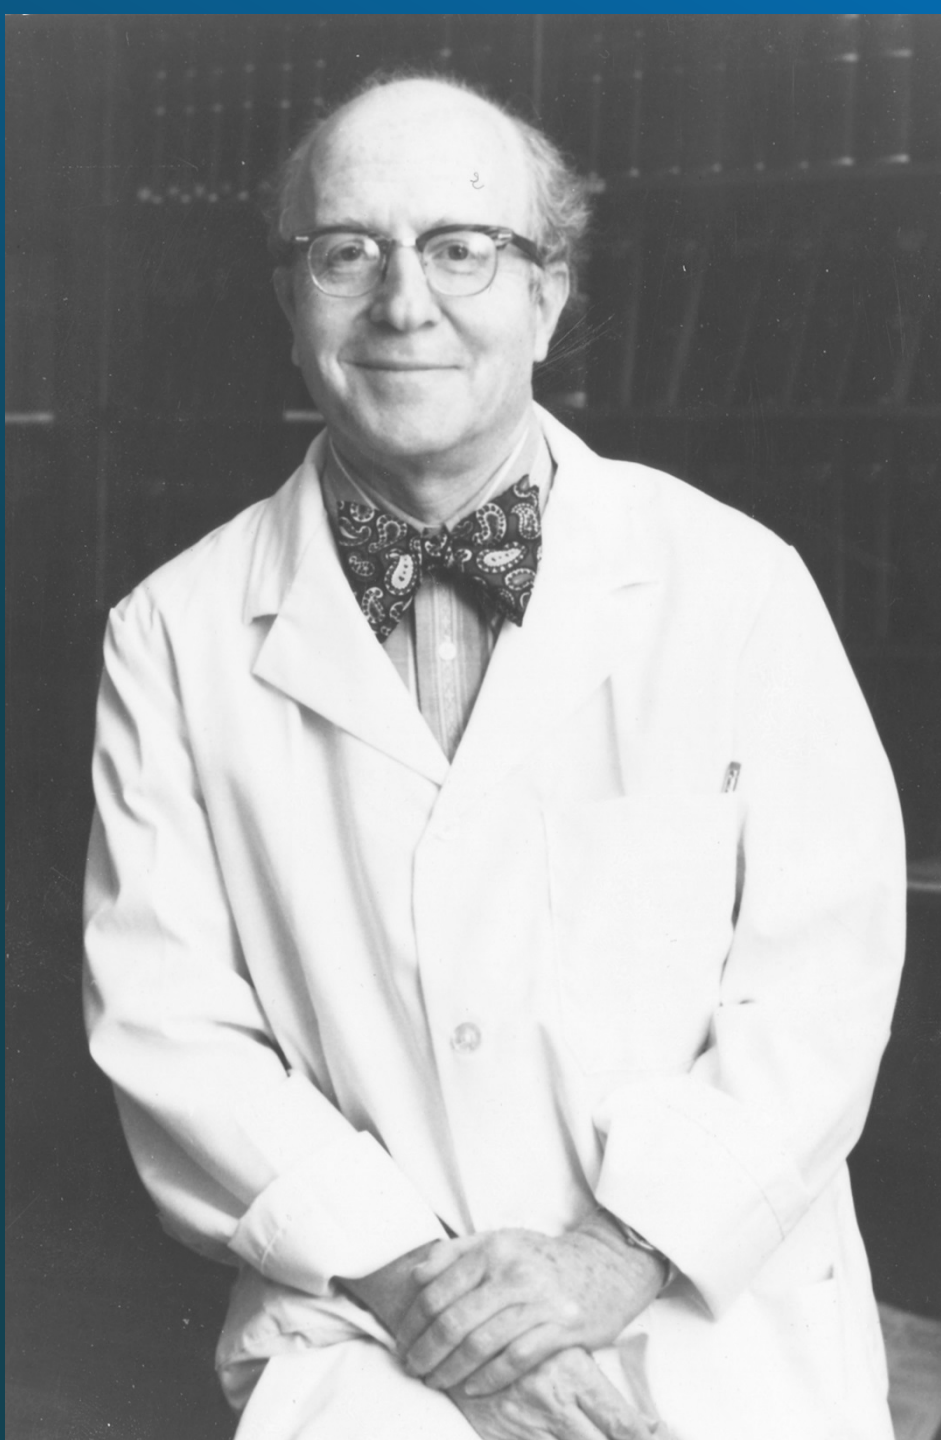

John Romano, MD

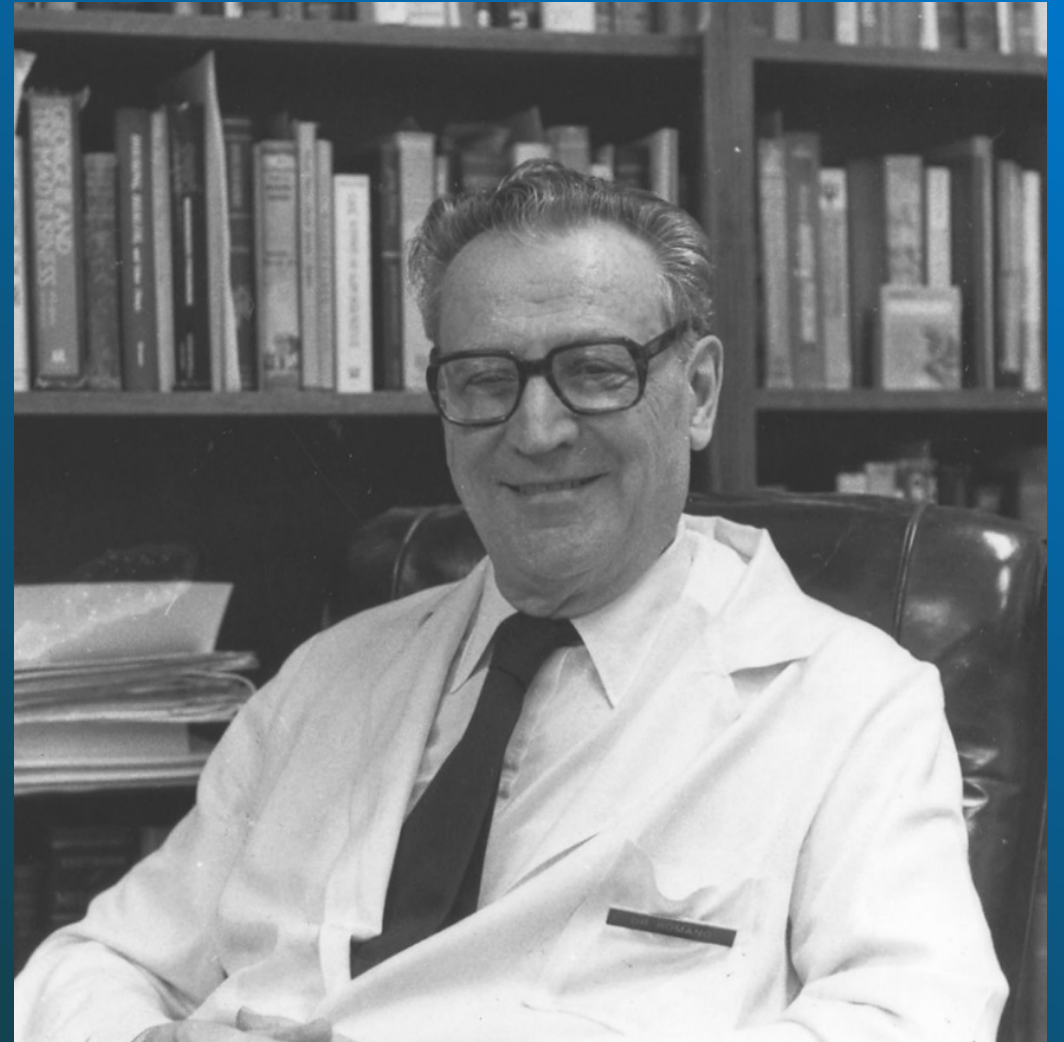



George  
Engel,  
MD

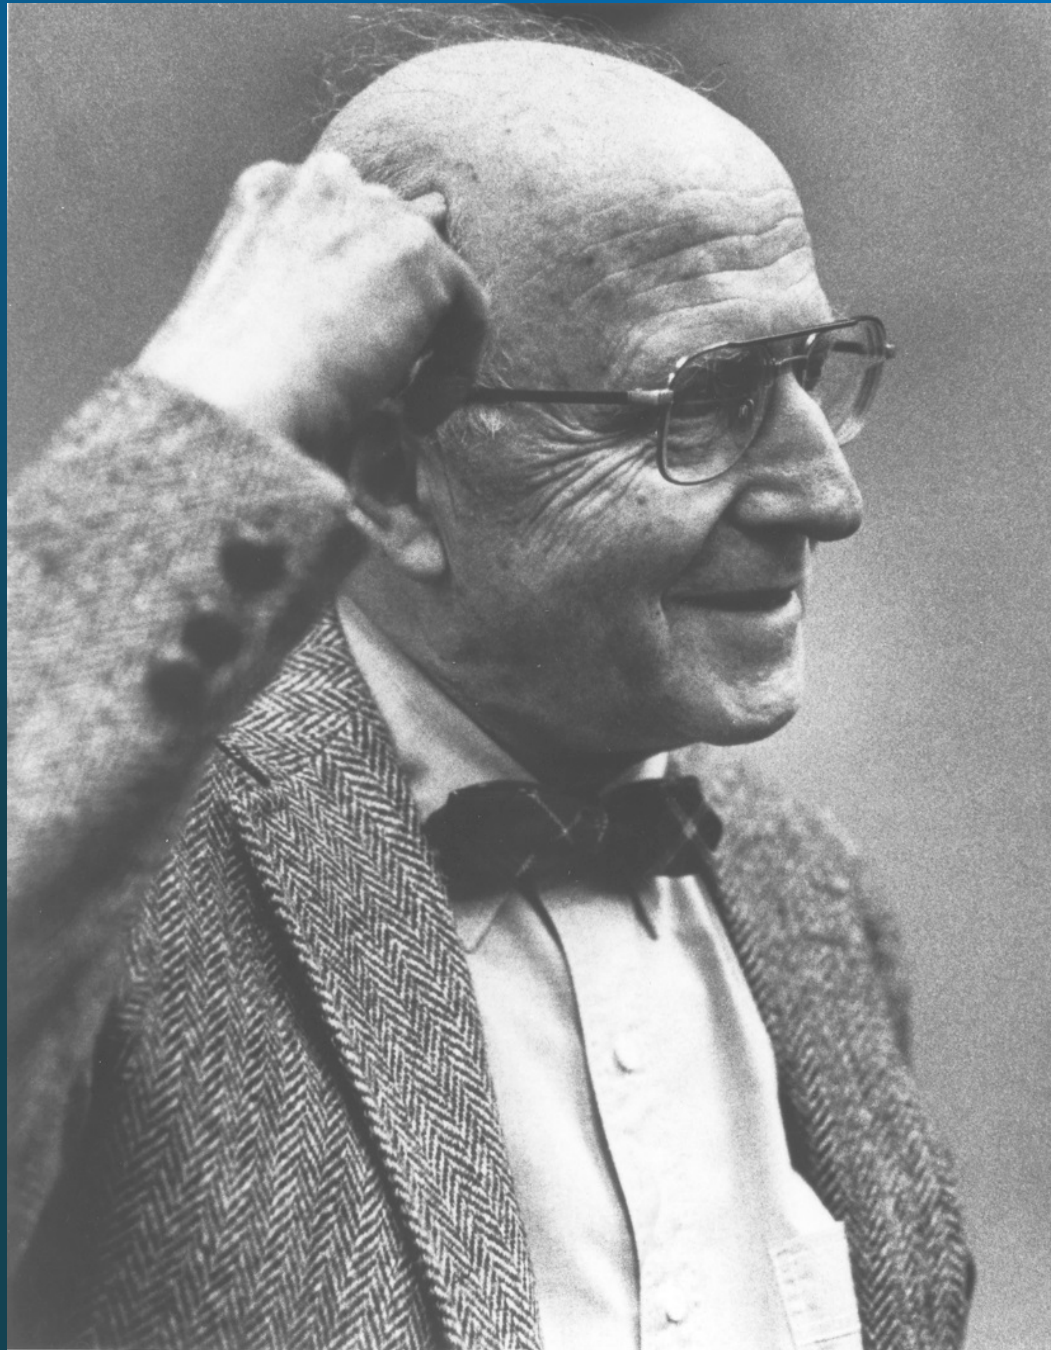



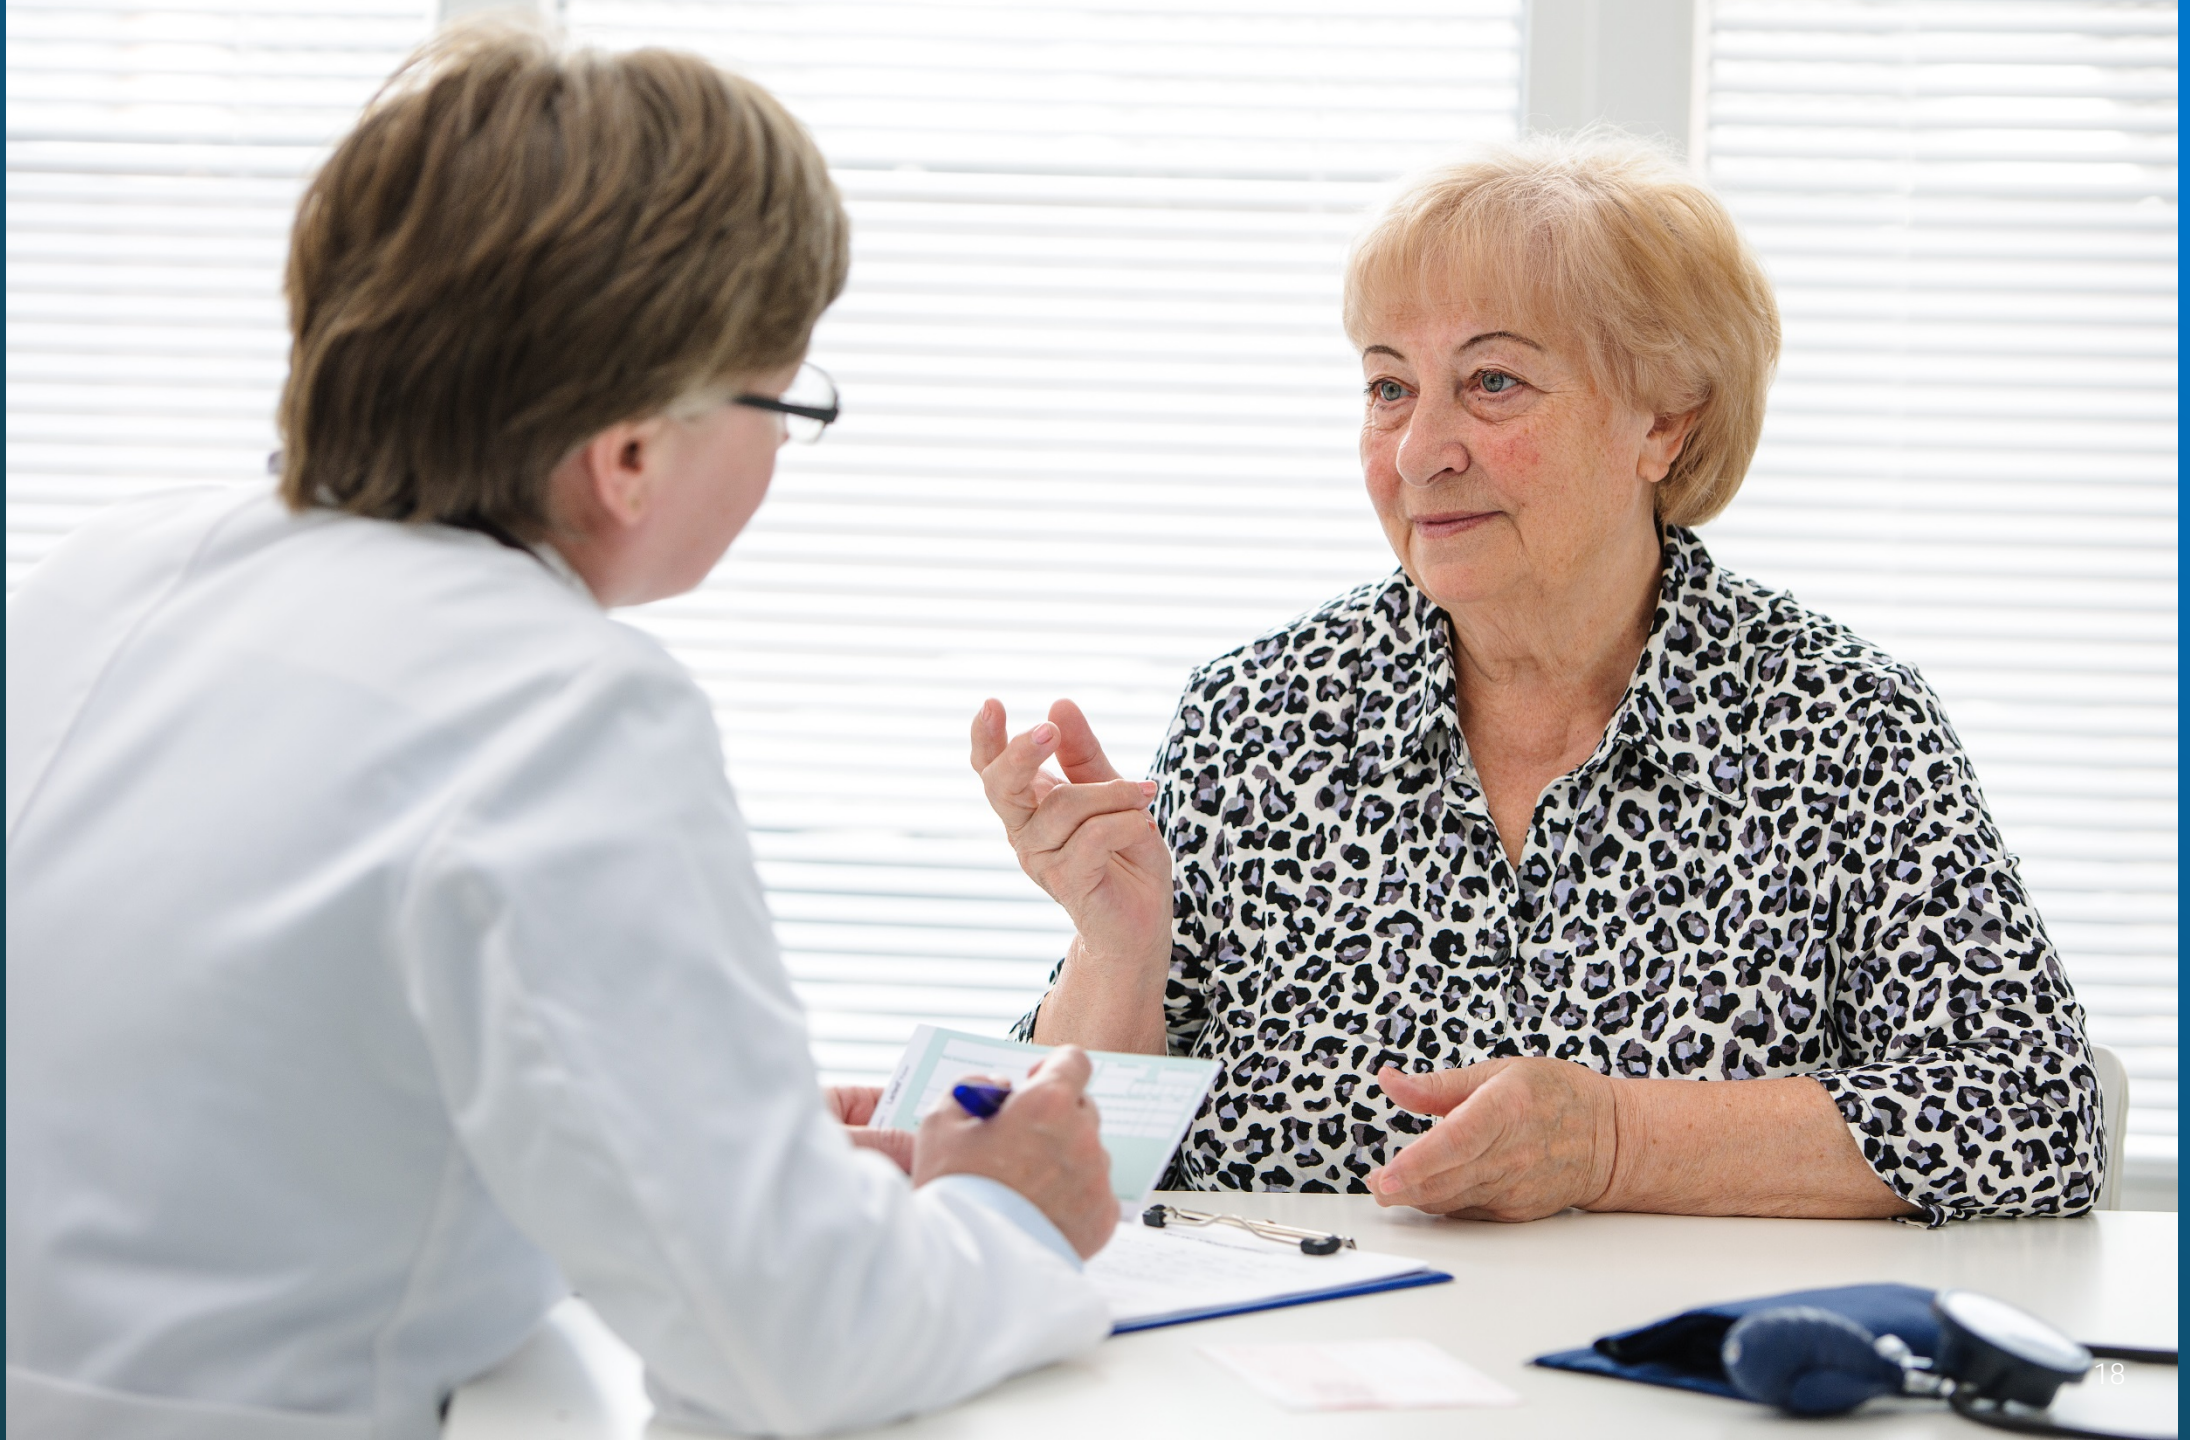



# Double Helix Curriculum, University of Rochester

Patient-  
Centered

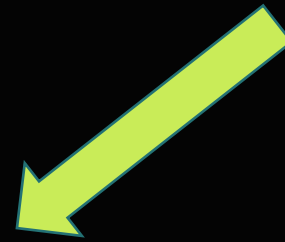

Science-Based

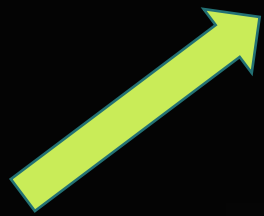



# Ronald M. Epstein, MD – Mindful Practice

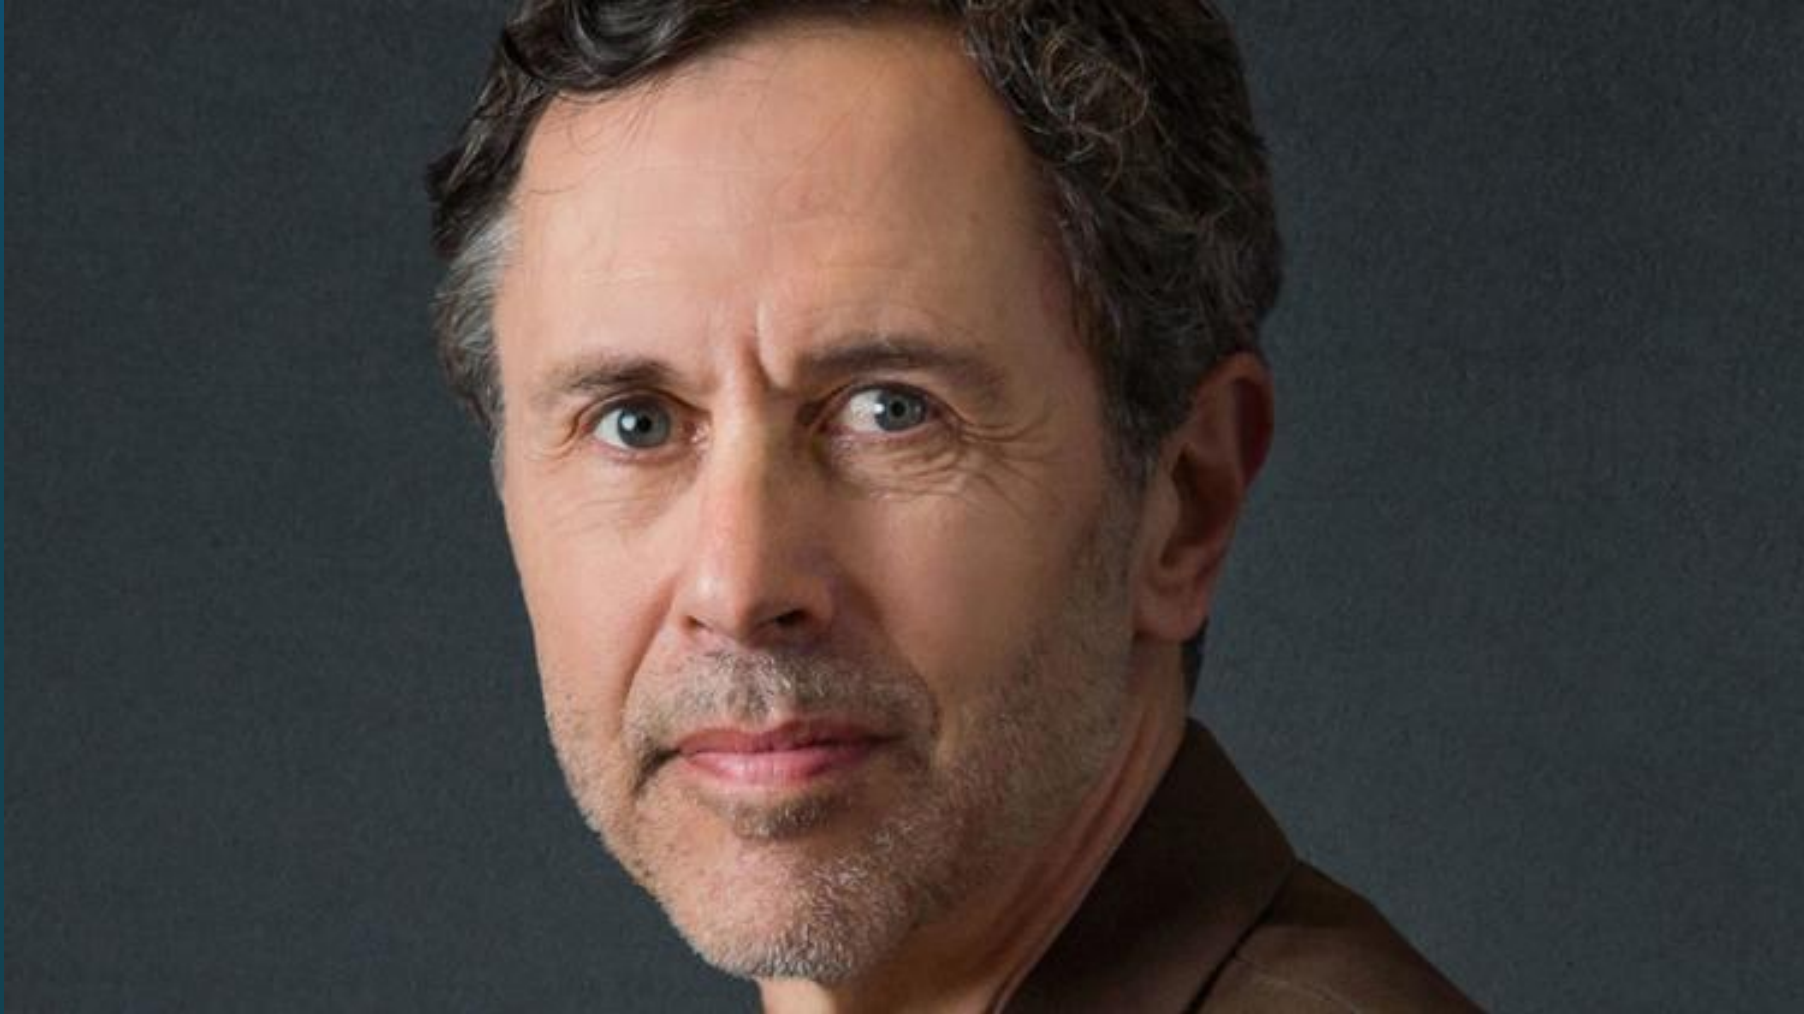

Stephen S. Reardon, photographer

# Attending

MEDICINE,  
MINDFULNESS,  
*and* HUMANITY

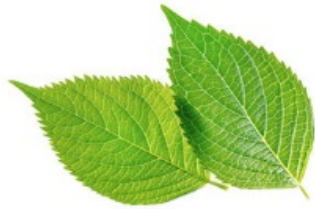

Ronald Epstein, M.D.



*Register Today!*  
Mindful Practice Workshop  
Enhancing Quality of Care, Quality of Caring  
and Resilience

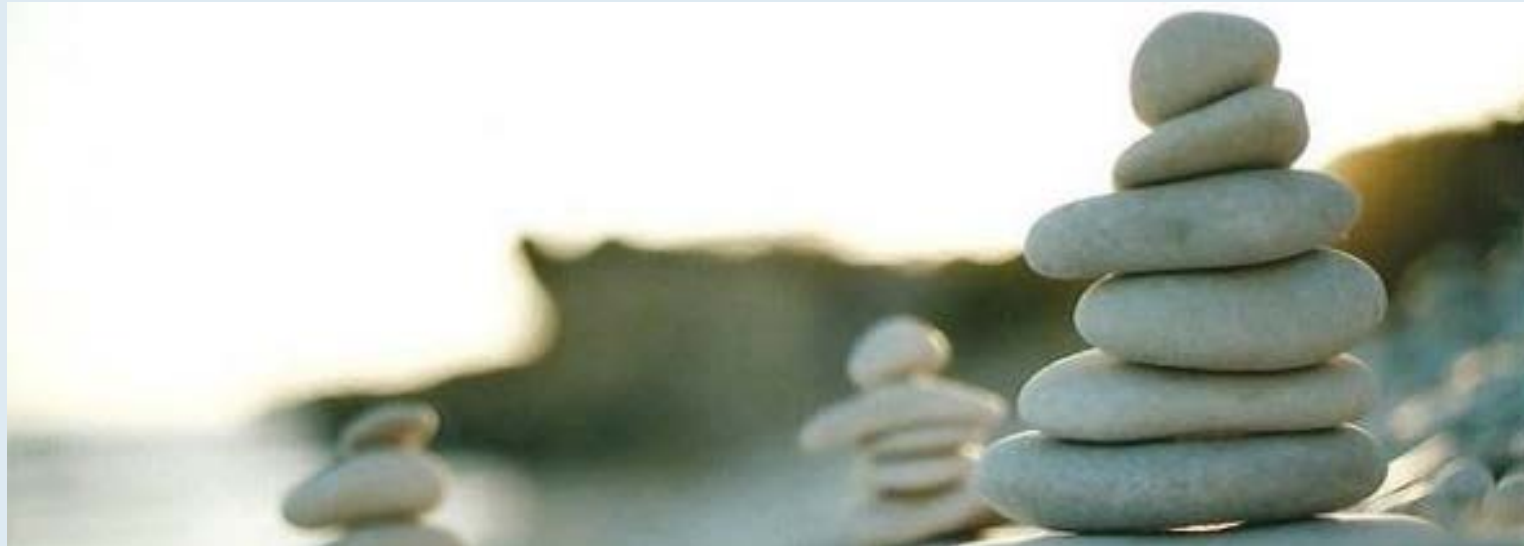

**October 26-29, 2016**

**Sponsored by:** The Department of Family Medicine - Mindful Practice Programs

**Hosted by:** The Center for Experiential Learning

**A 4-day, retreat-like workshop** designed to improve the quality of care that clinicians provide while improving their own resilience and well-being. It offers an experiential learning environment, with a focus on developing the capacity for self-awareness in stressful and demanding situations.



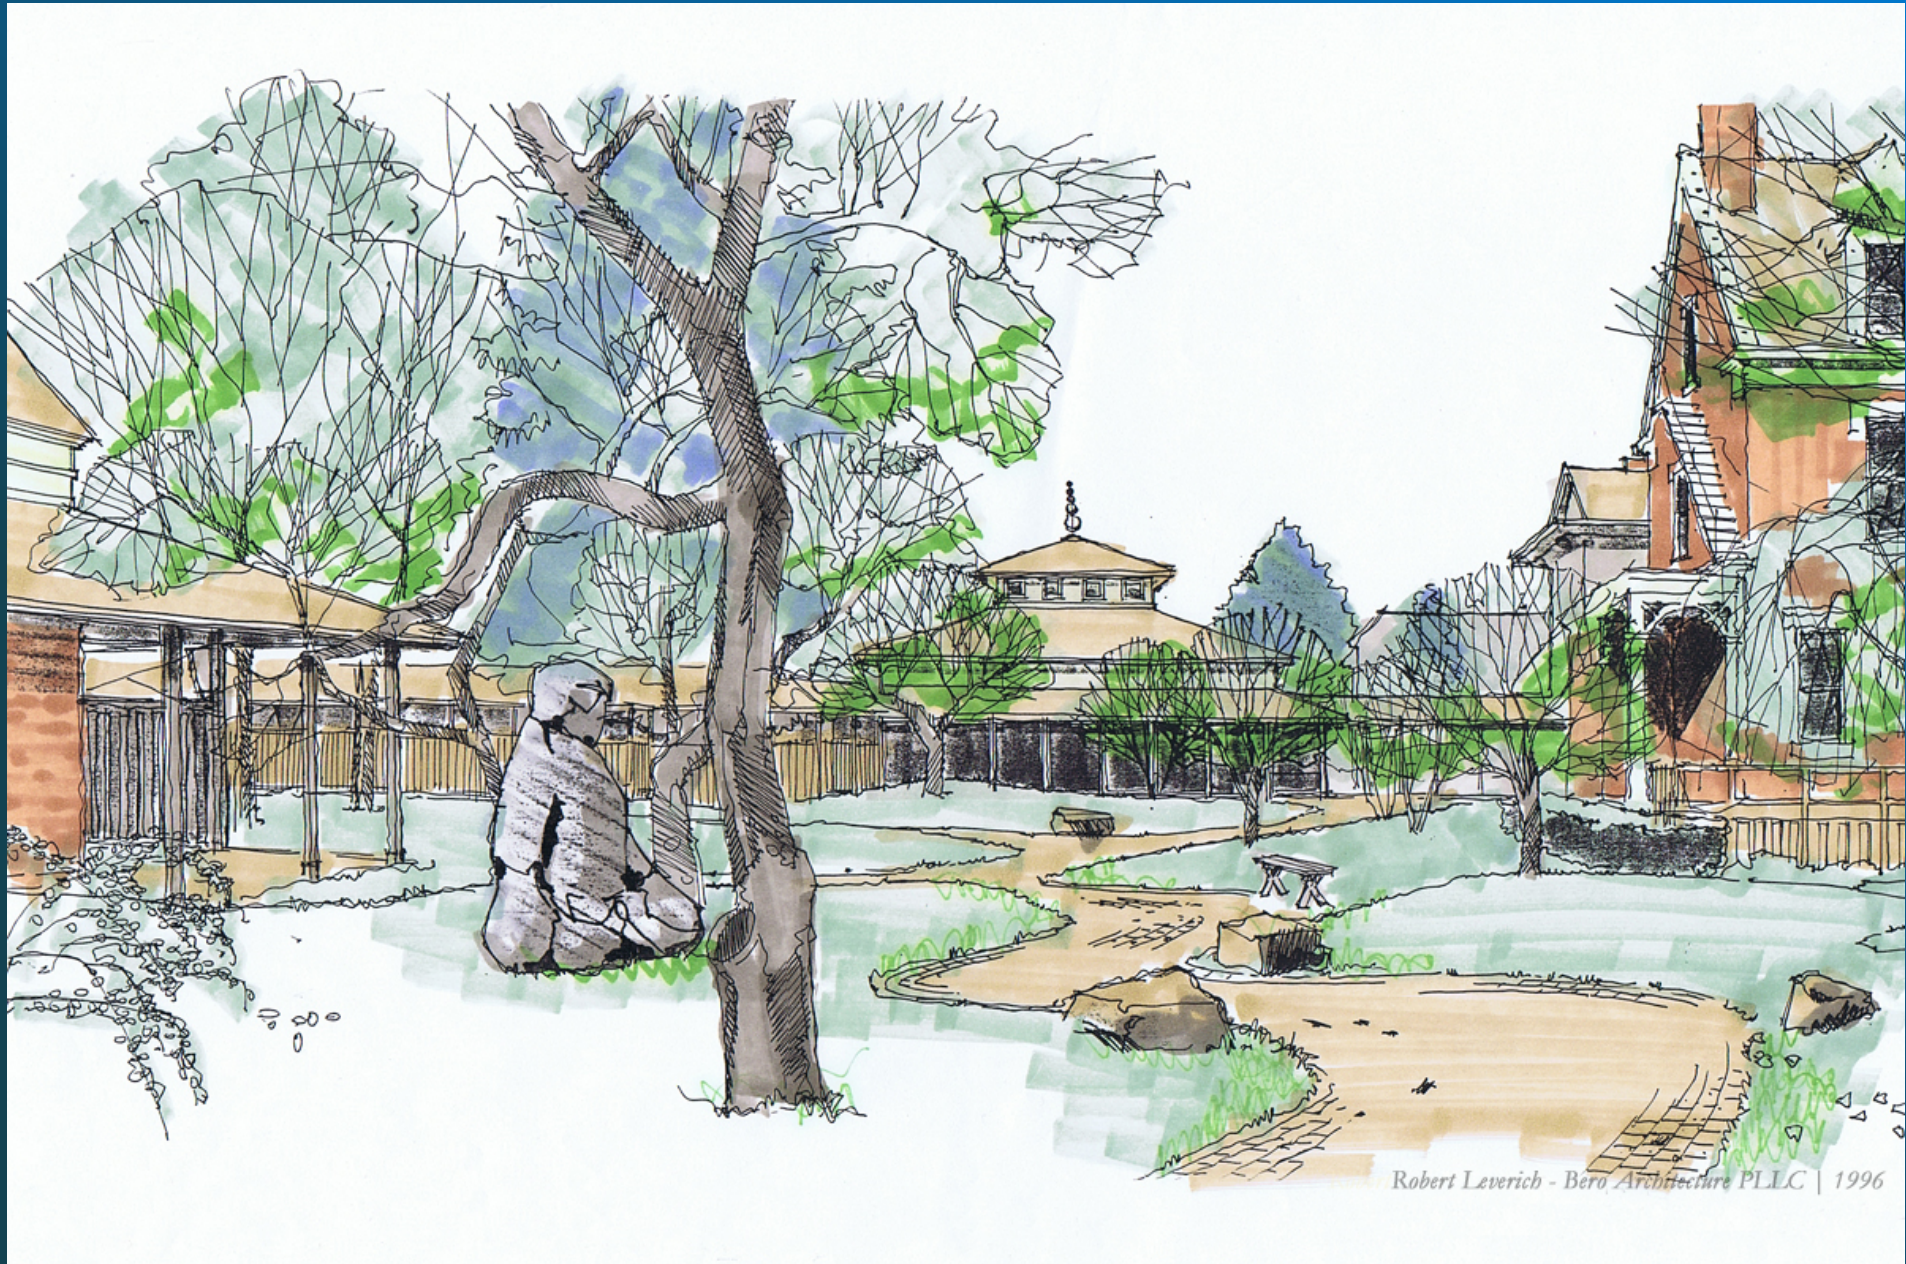

Robert Leverich; Bero Architecture PLLC; 1996; pre-design



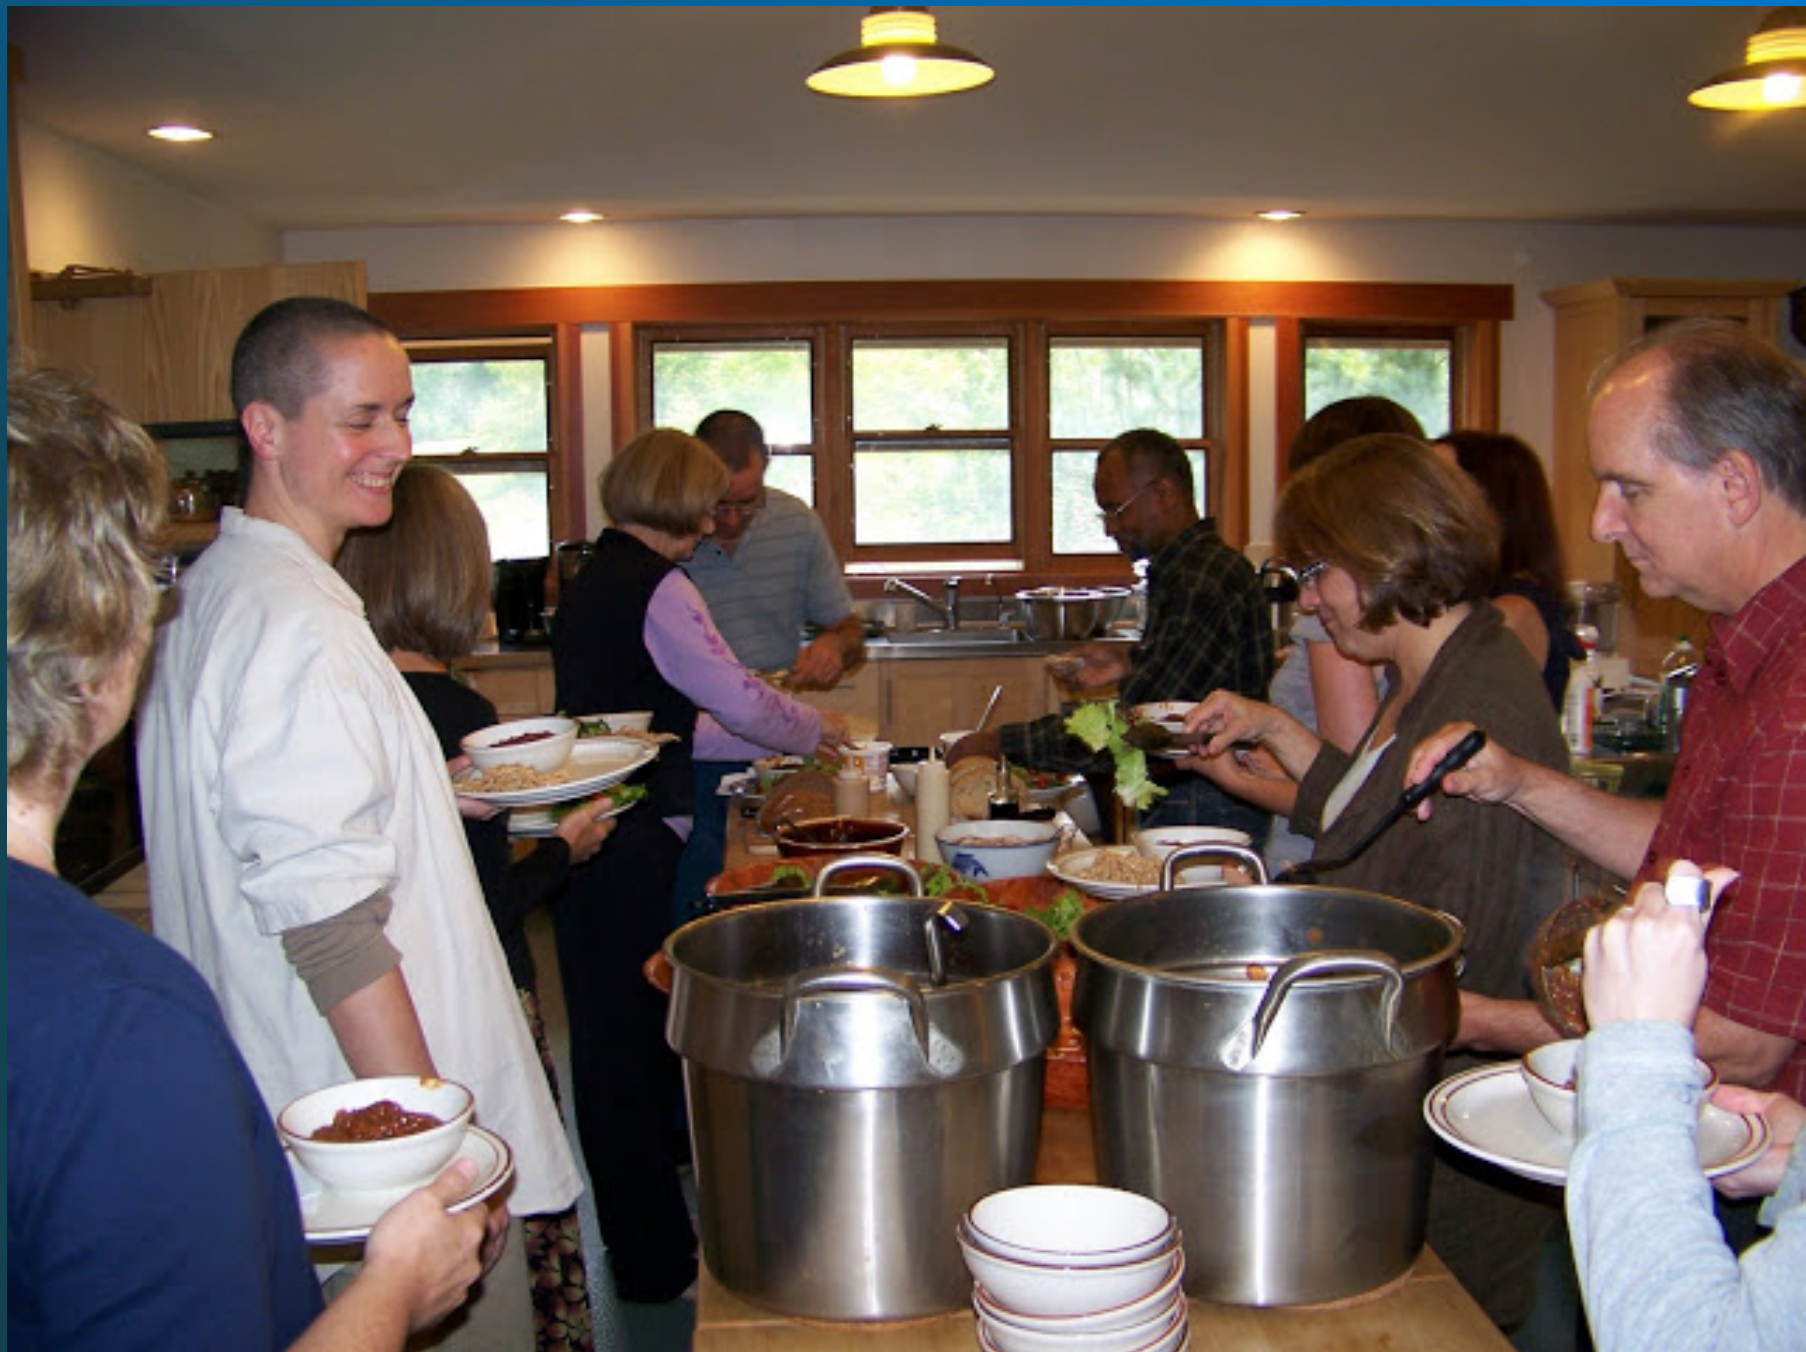

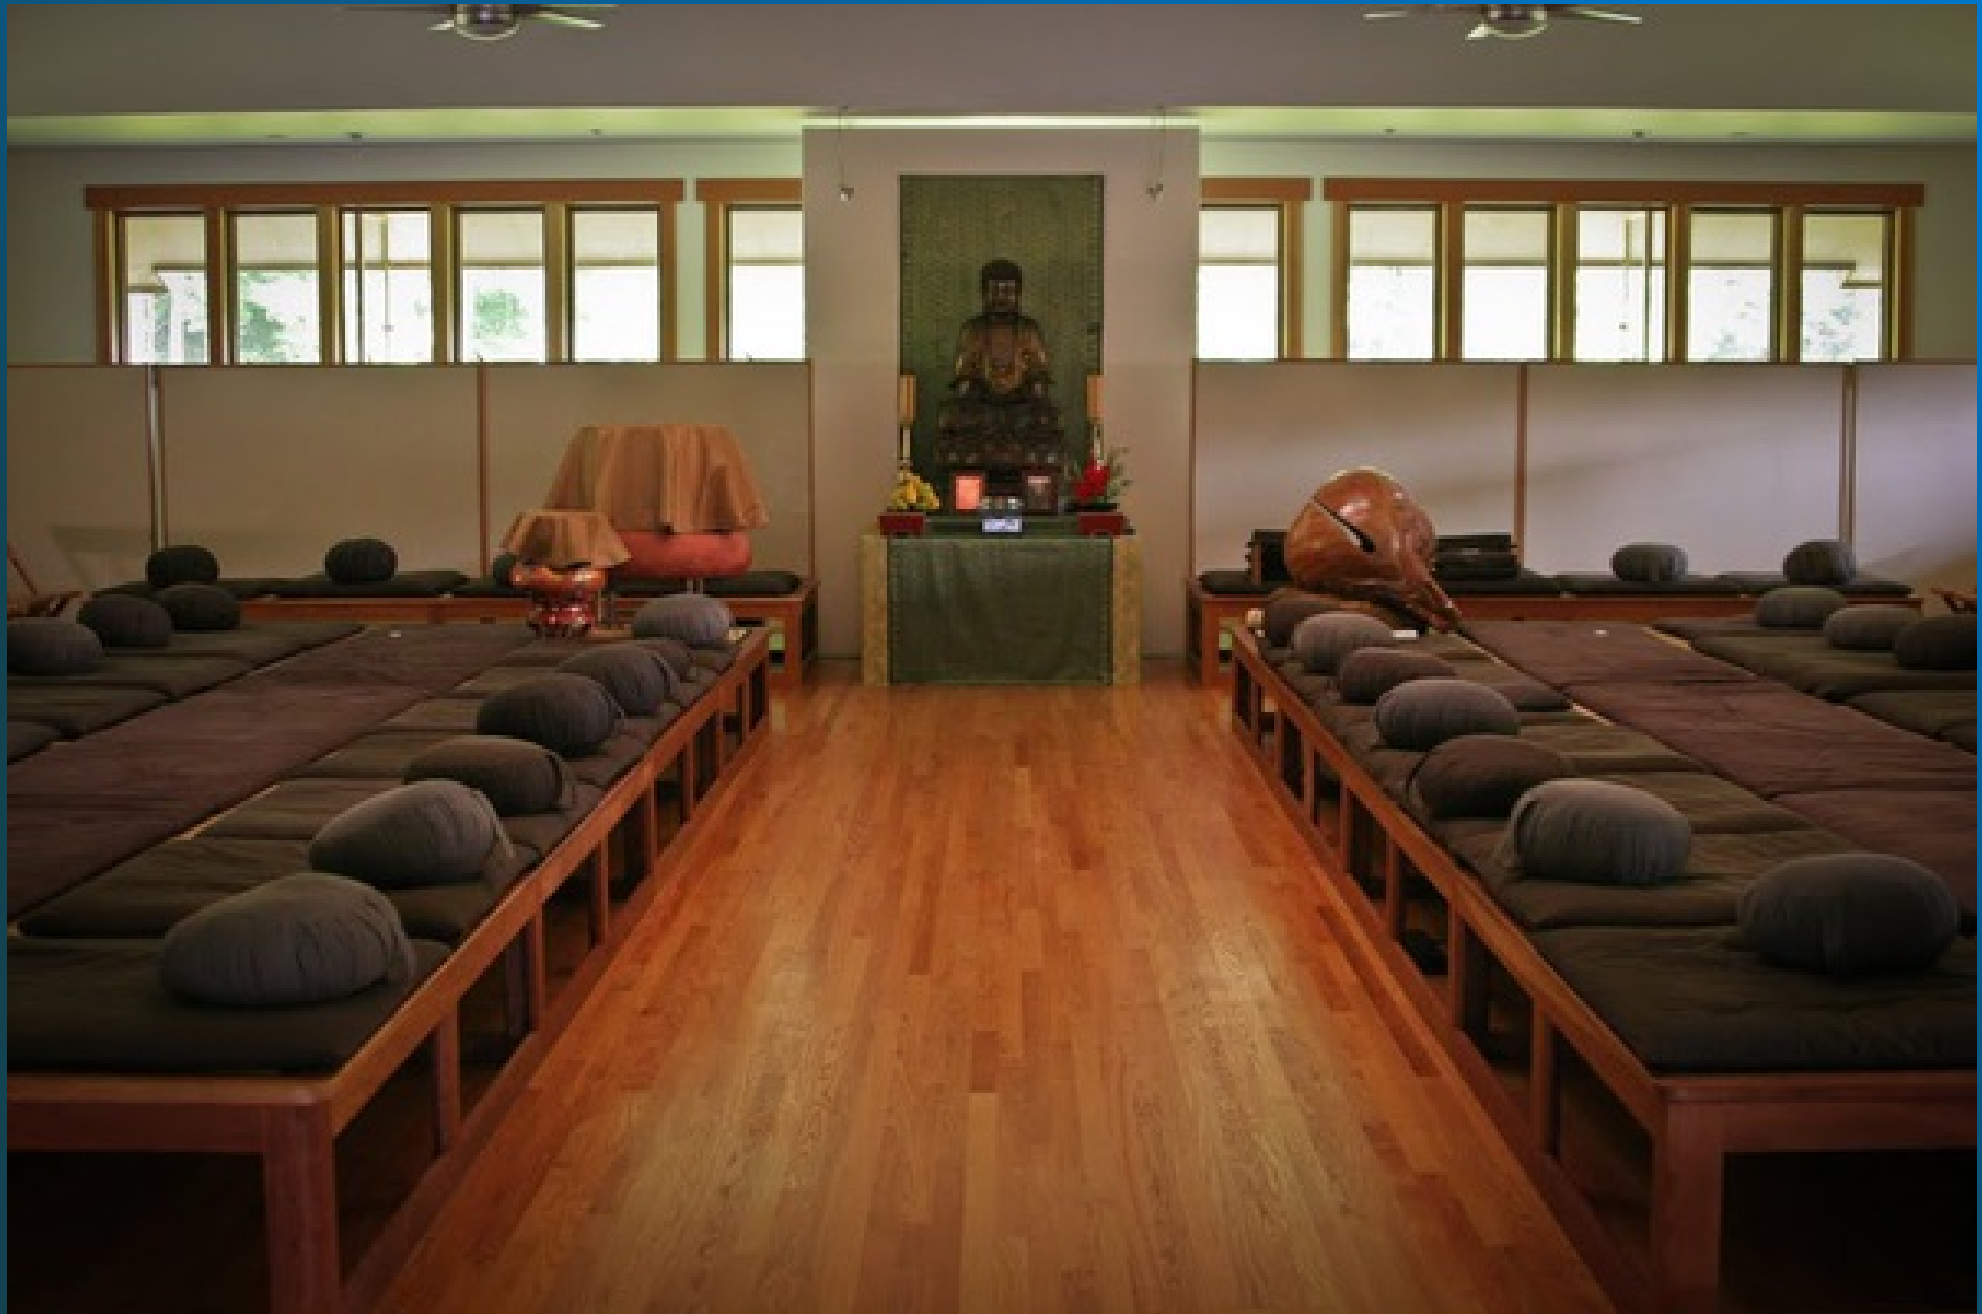



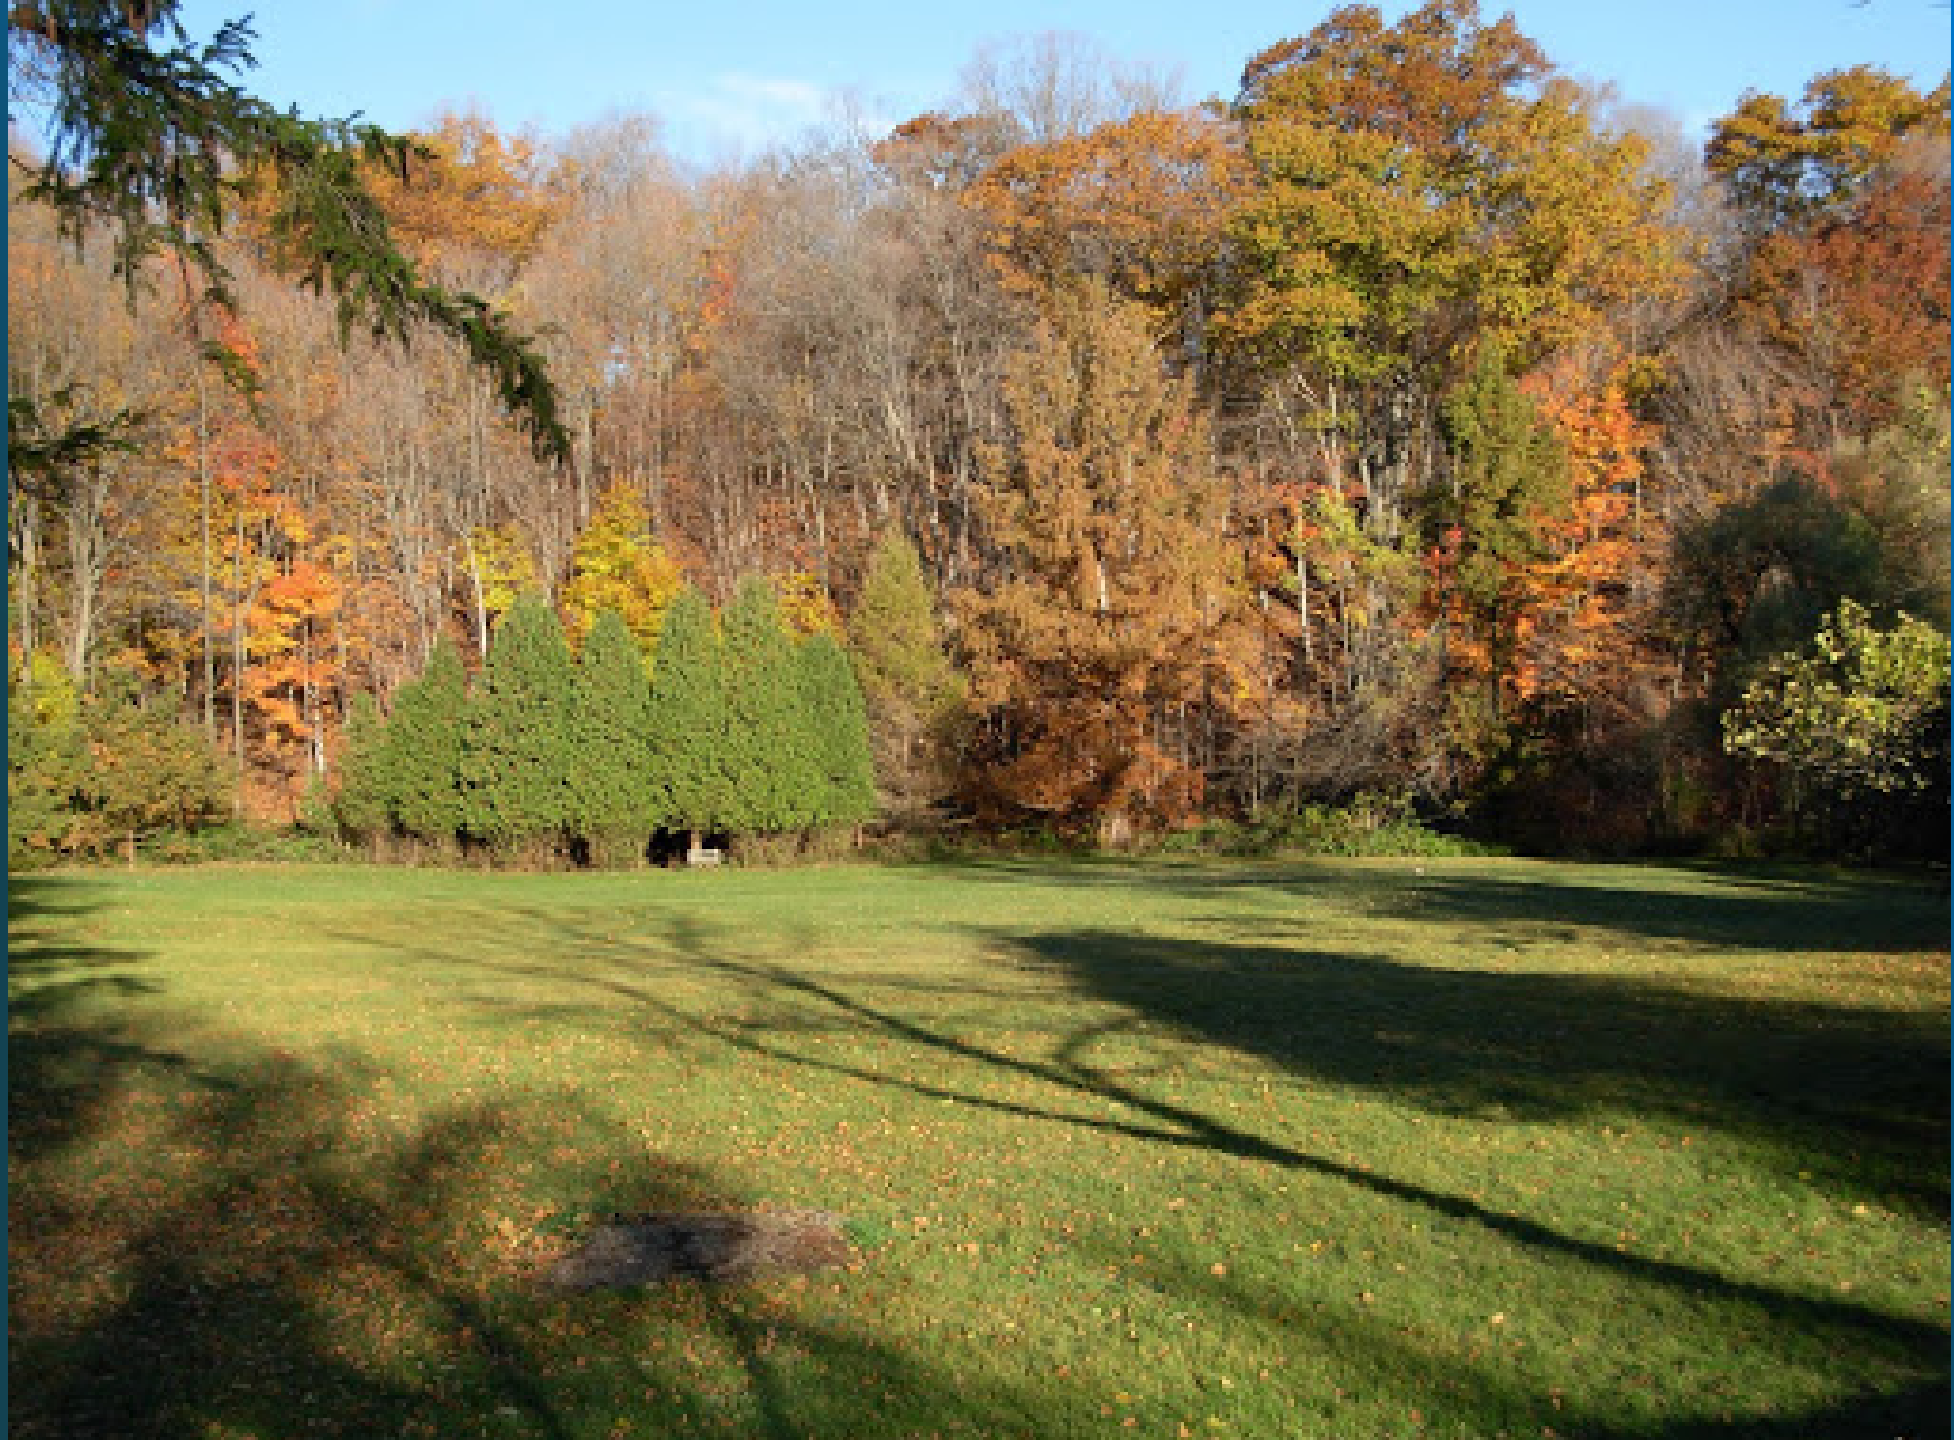

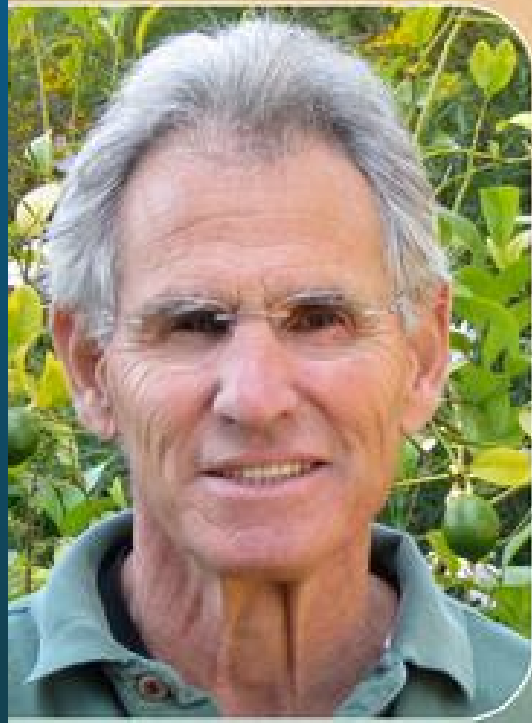

# Stress Reduction

JON KABAT-ZINN



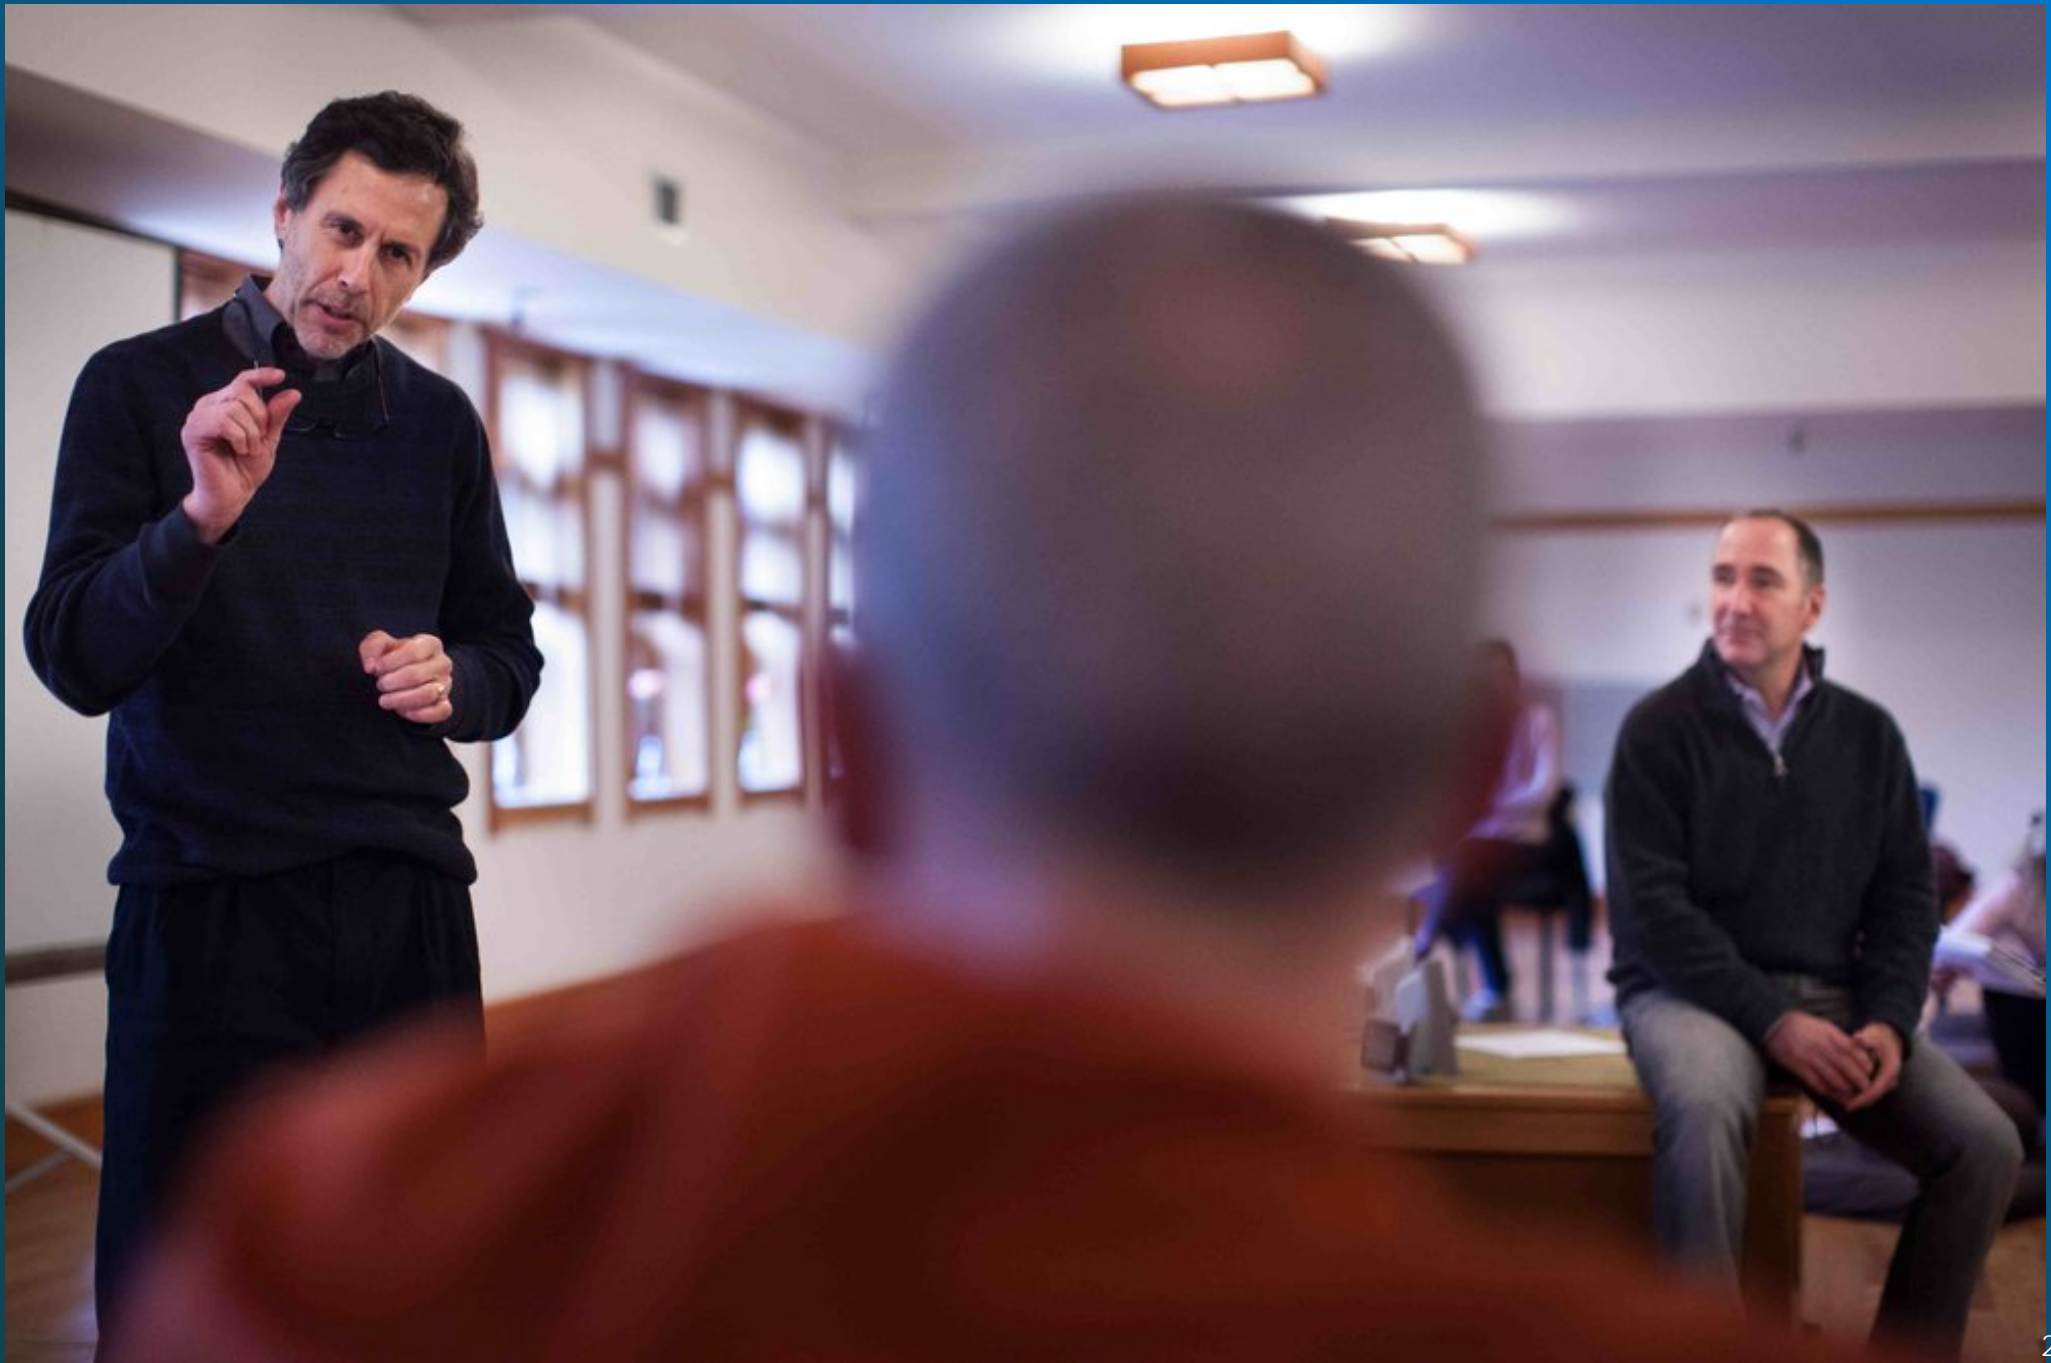



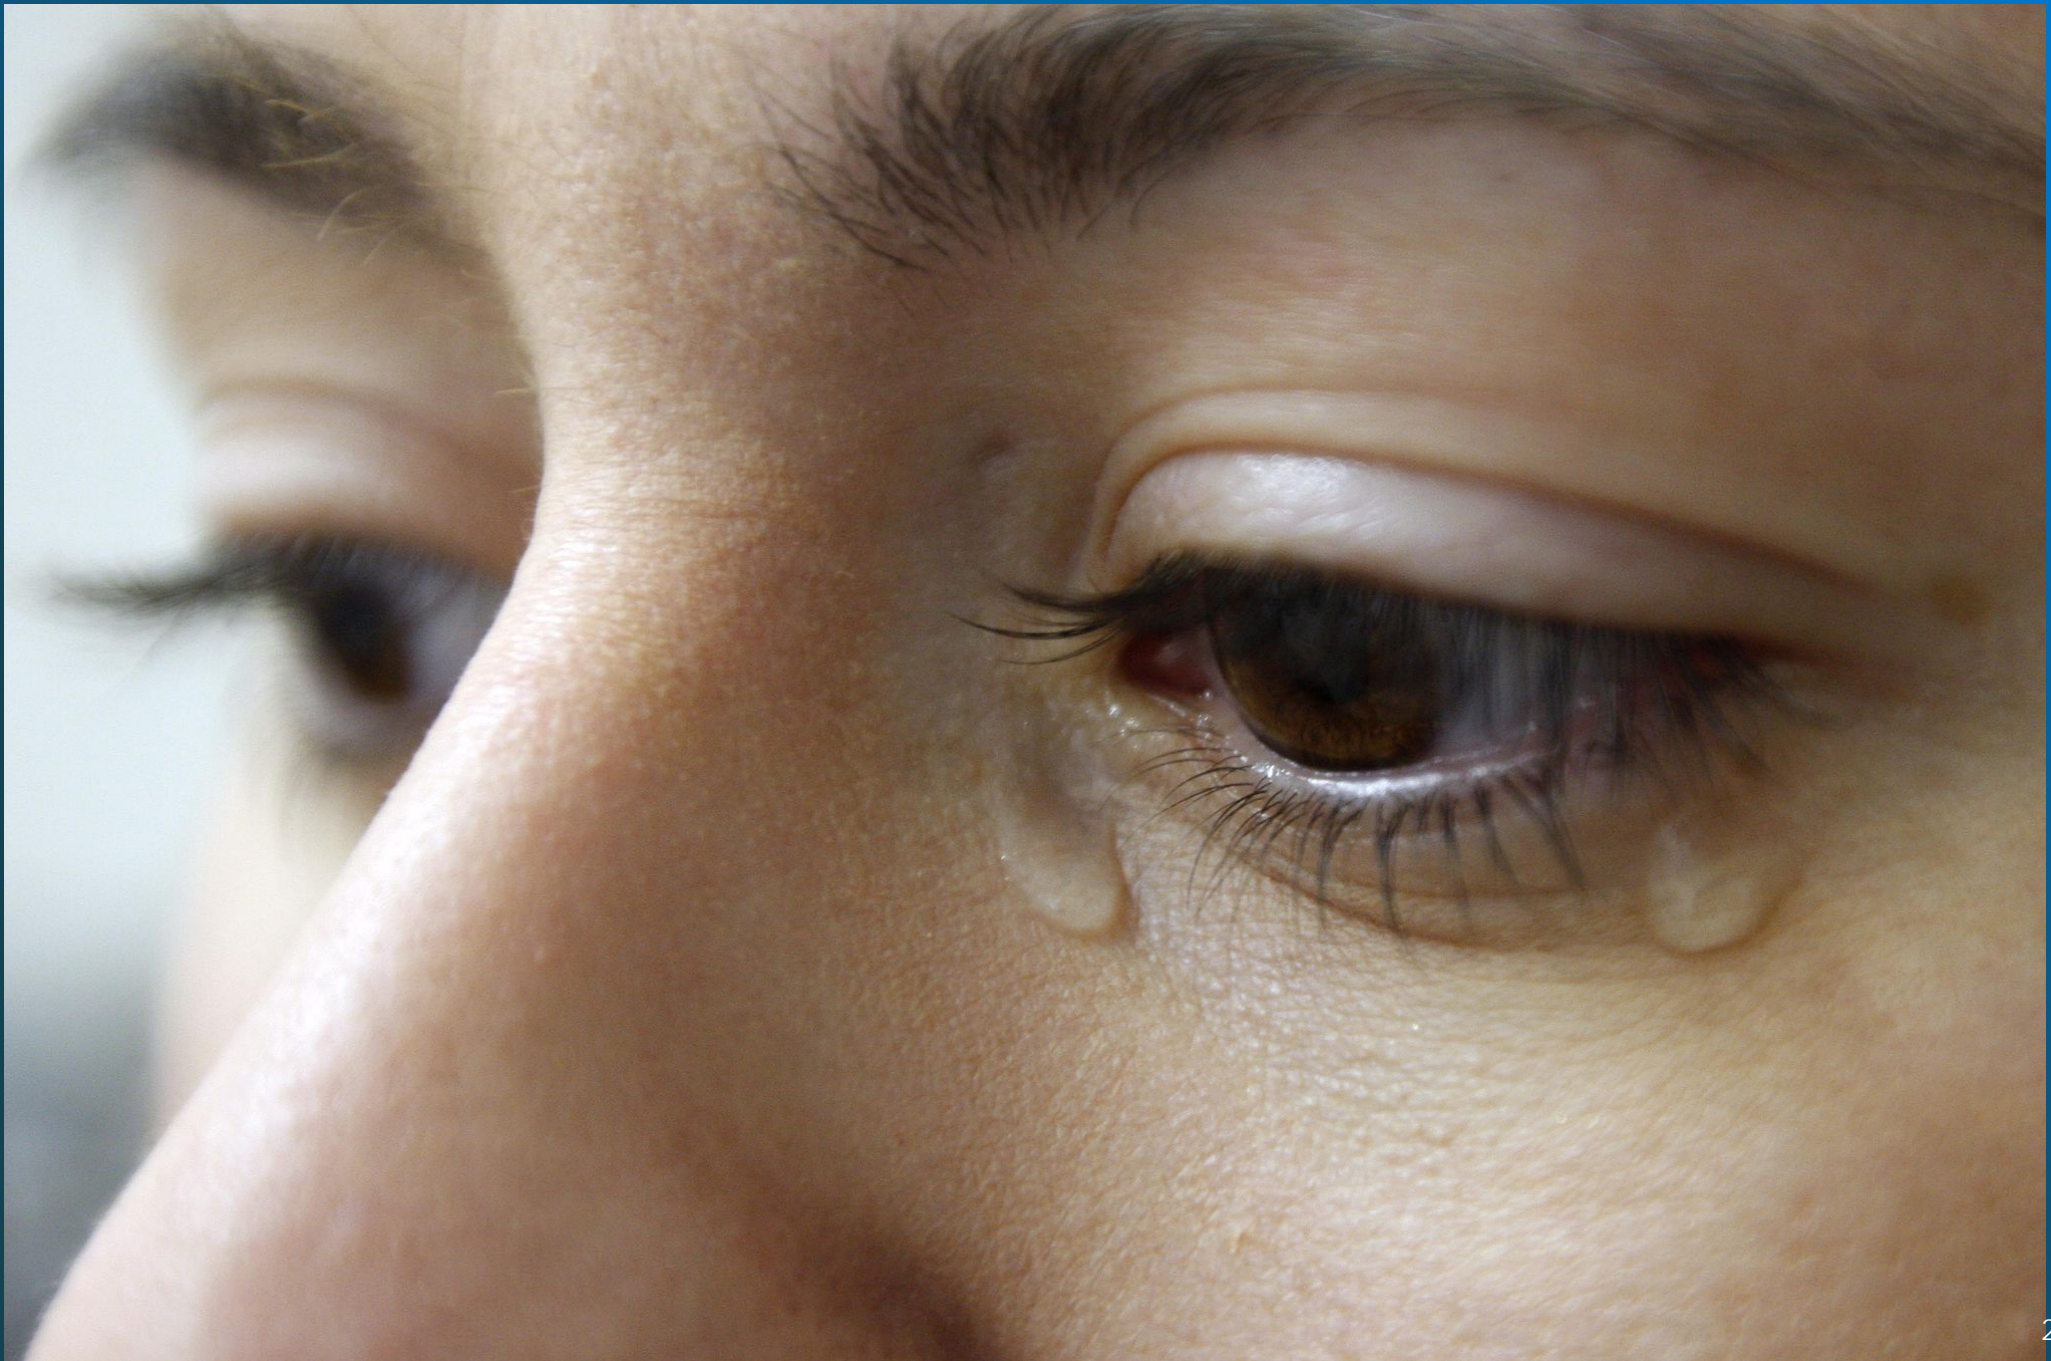



# CCARE

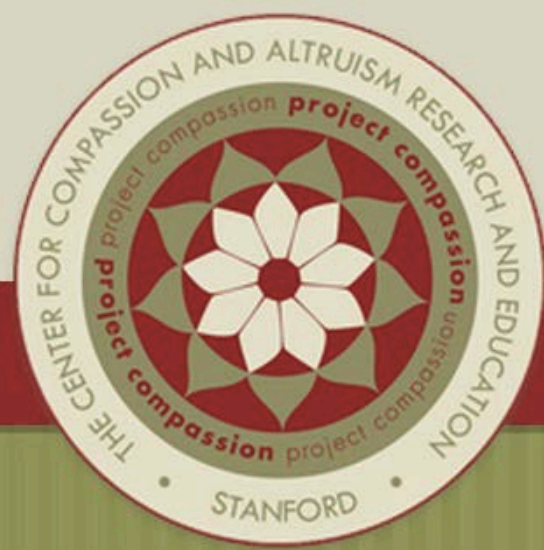

ABOUT RESEARCH EDUCATION

EVENTS

VIDEOS

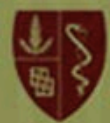

STANFORD  
SCHOOL OF MEDICINE

THE CENTER FOR COMPASSION AND  
ALTRUISM RESEARCH AND EDUCATION

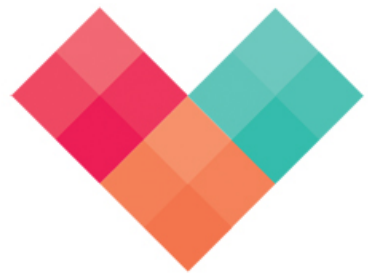

HEARTS  
in Healthcare

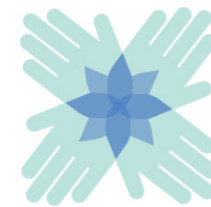

the schwartz center  
FOR COMPASSIONATE HEALTHCARE

*All Healthcare Givers Invited*

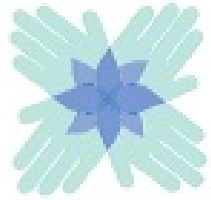

the schwartz center  
**Rounds®**

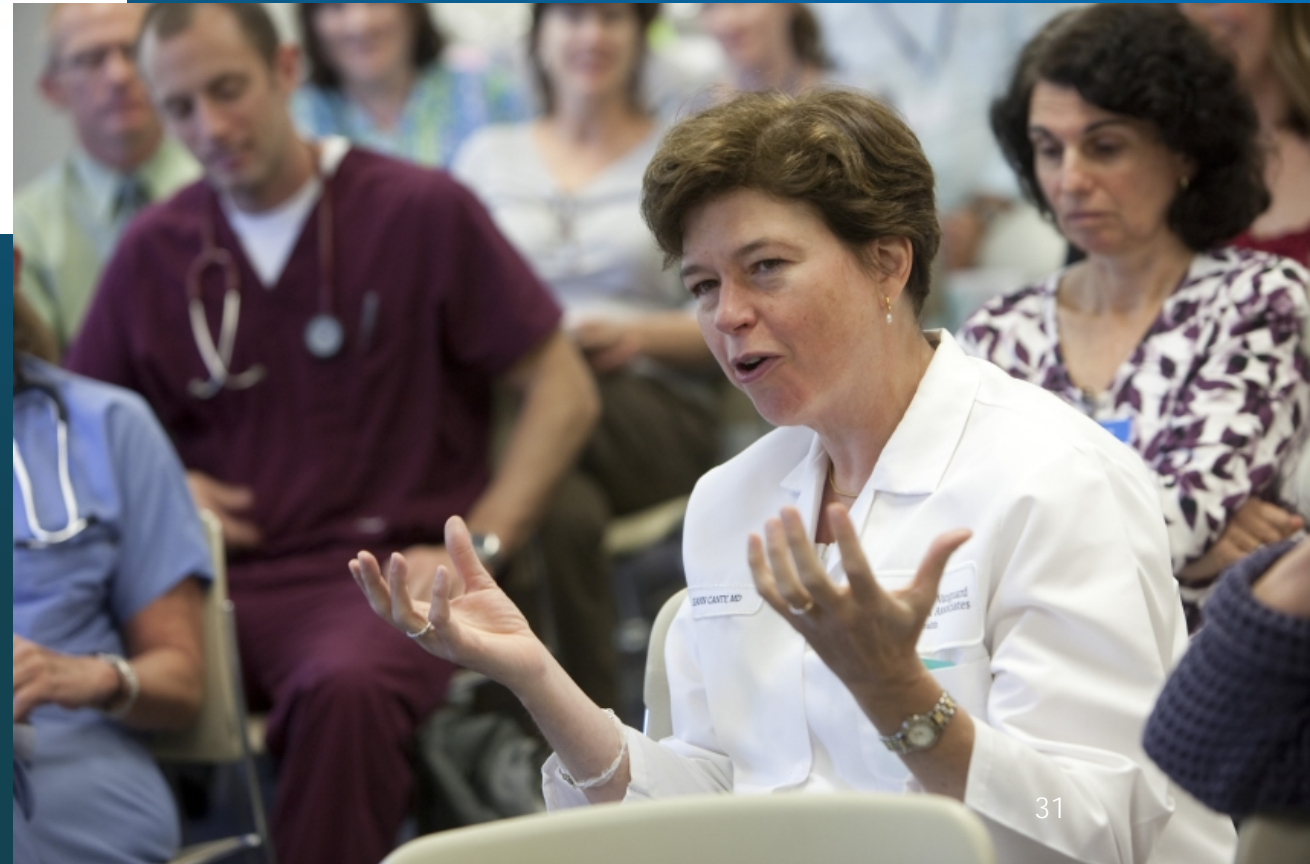



marc.ucla

mindful awareness research center

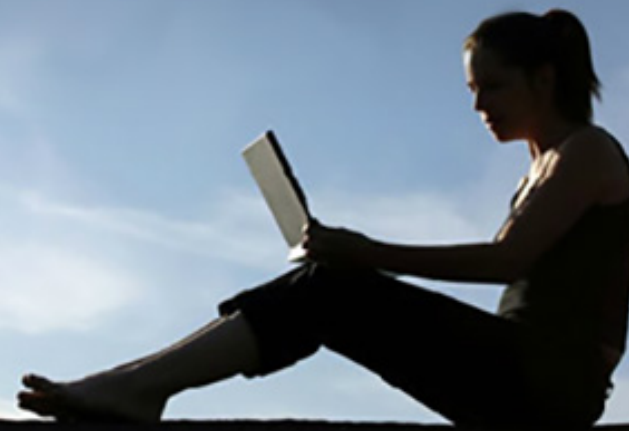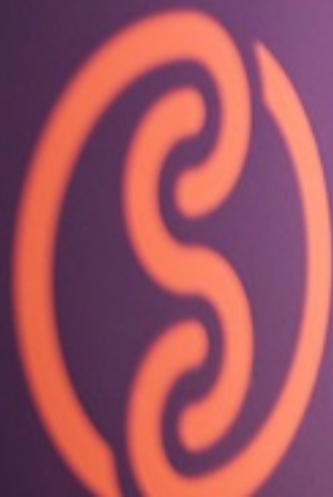

Center for  
Investigating  
Healthy Minds

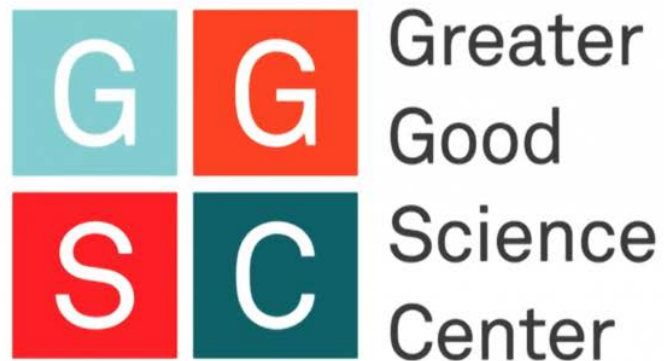

**Berkeley**  
UNIVERSITY OF CALIFORNIA

Magazine covers with headline articles  
about mindfulness



# Neuroscience of the Mindful Brain

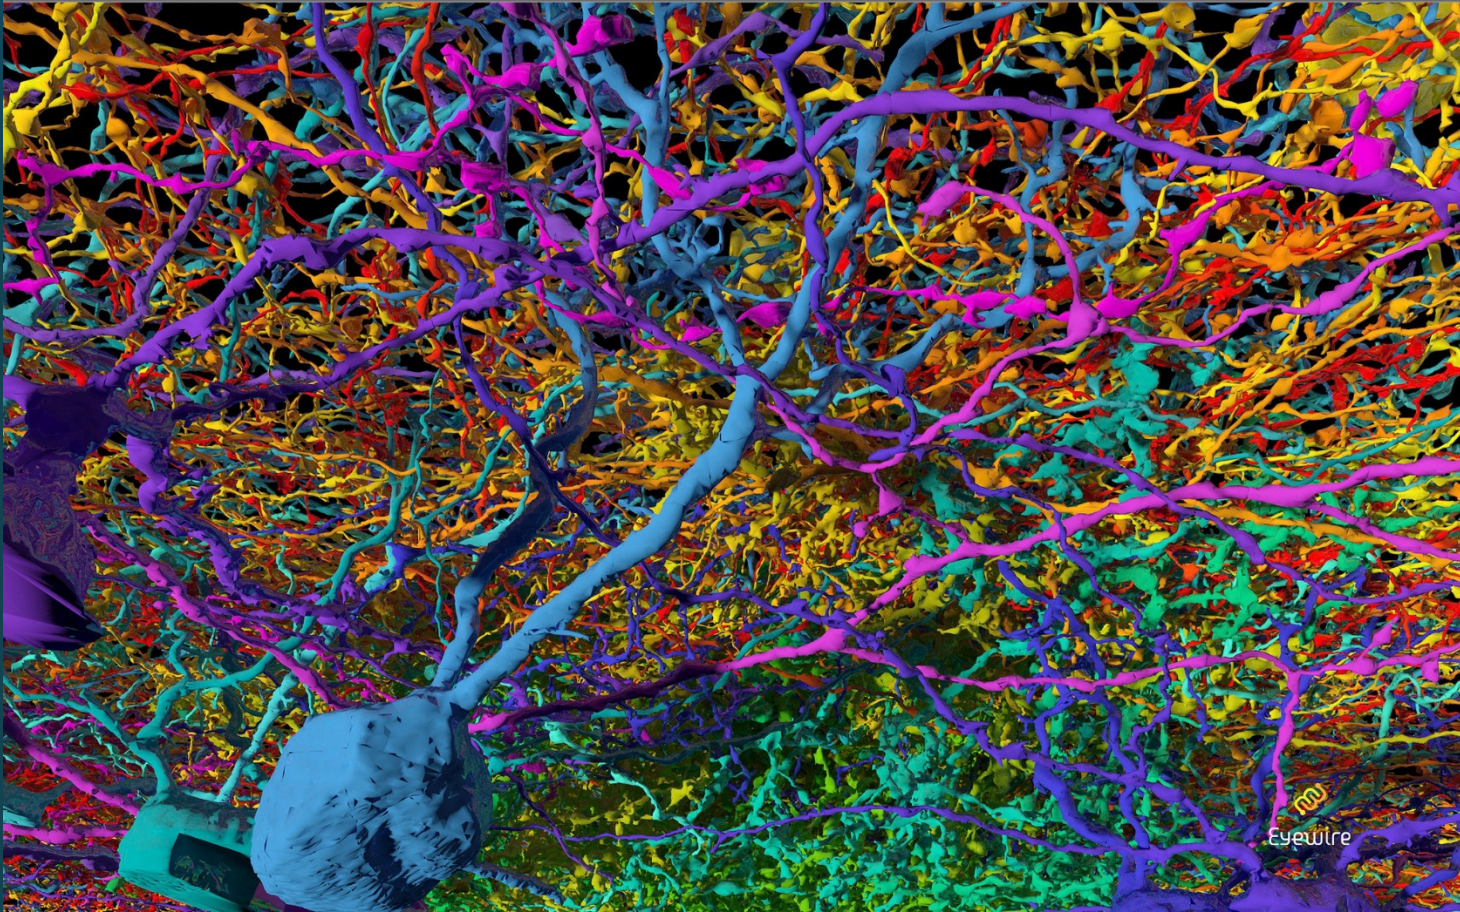

- Contemplative Neuroscience
- Affective Neuroscience
- Interpersonal Neurobiology



How Its Unique Patterns Affect the Way You Think,  
Feel, and Live—and How You Can Change Them

# THE EMOTIONAL LIFE OF YOUR BRAIN

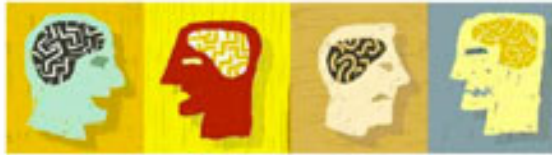

RICHARD J. DAVIDSON, Ph.D.  
and SHARON BEGLEY,  
bestselling author of *Train Your Mind, Change Your Brain*

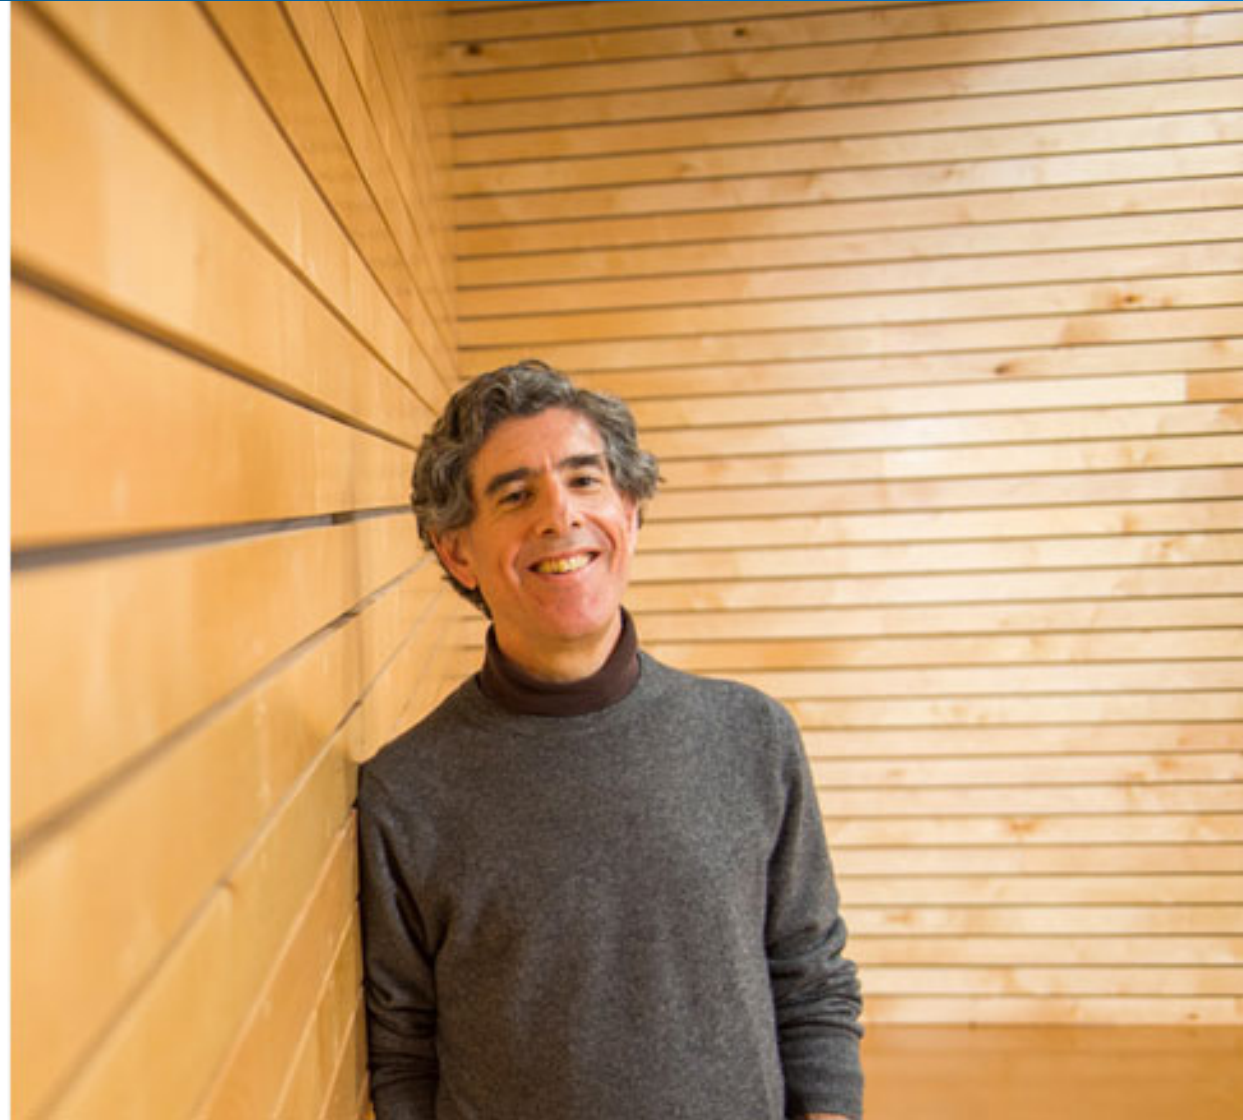



# THE MINDFUL BRAIN

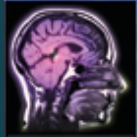

REFLECTION AND ATTUNEMENT  
IN THE CULTIVATION OF  
WELL-BEING

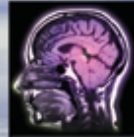

DANIEL J. SIEGEL

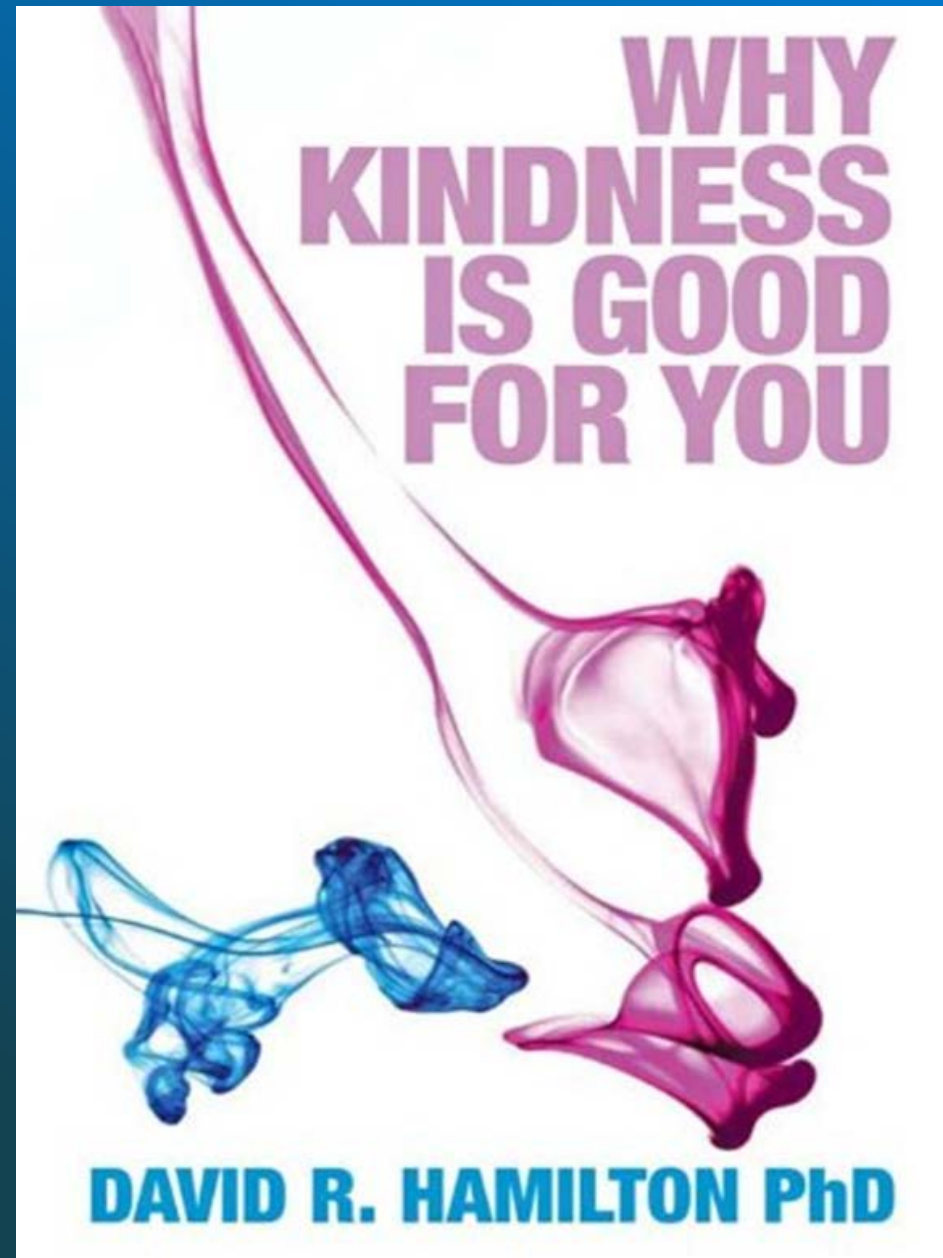

# Dopamine

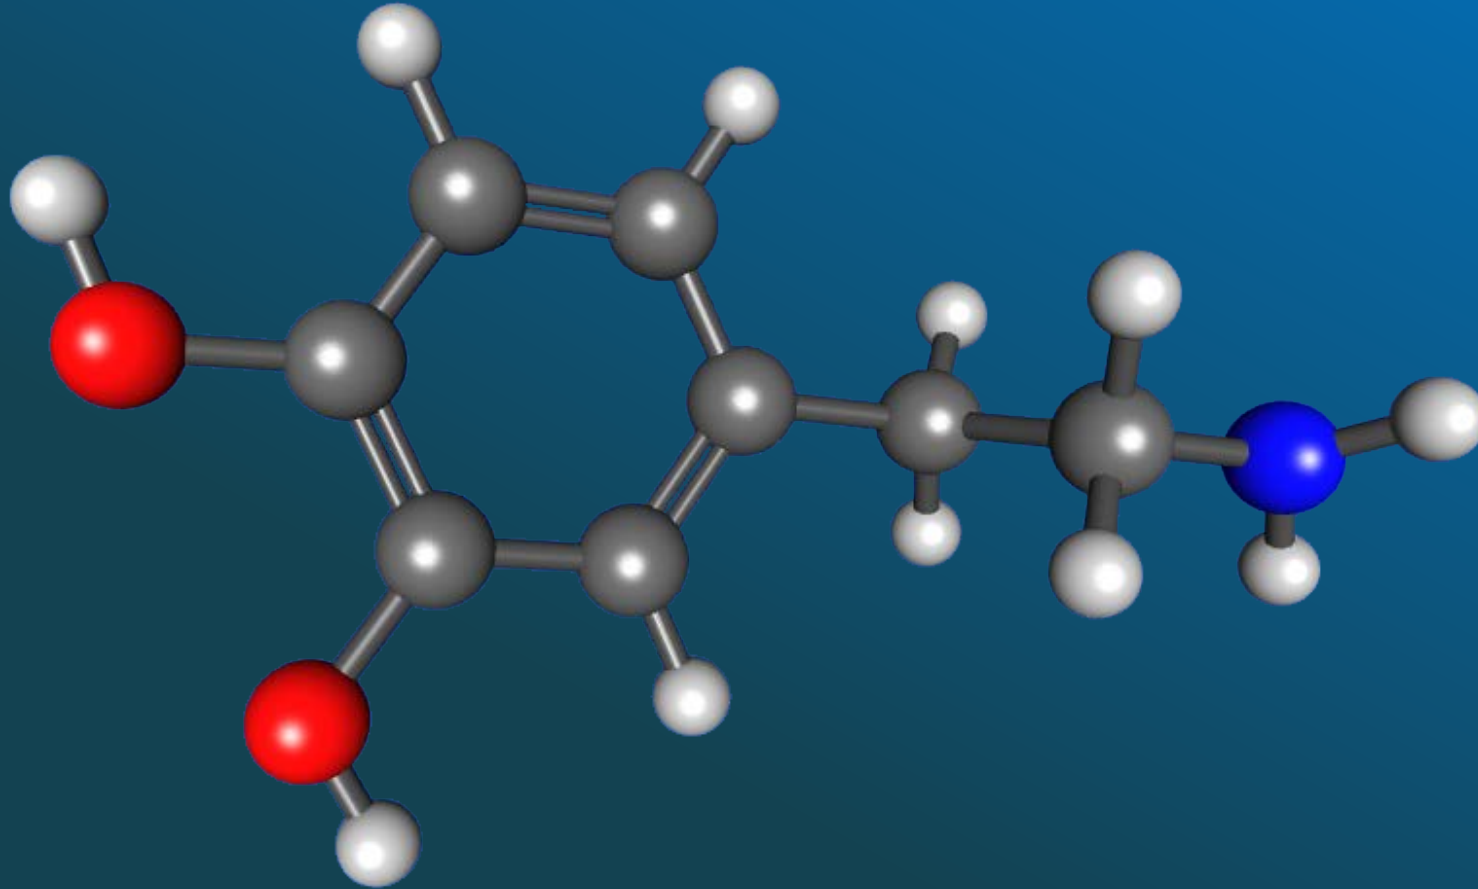



Cortisol

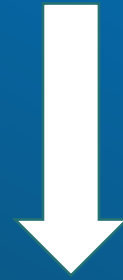

Blood Pressure

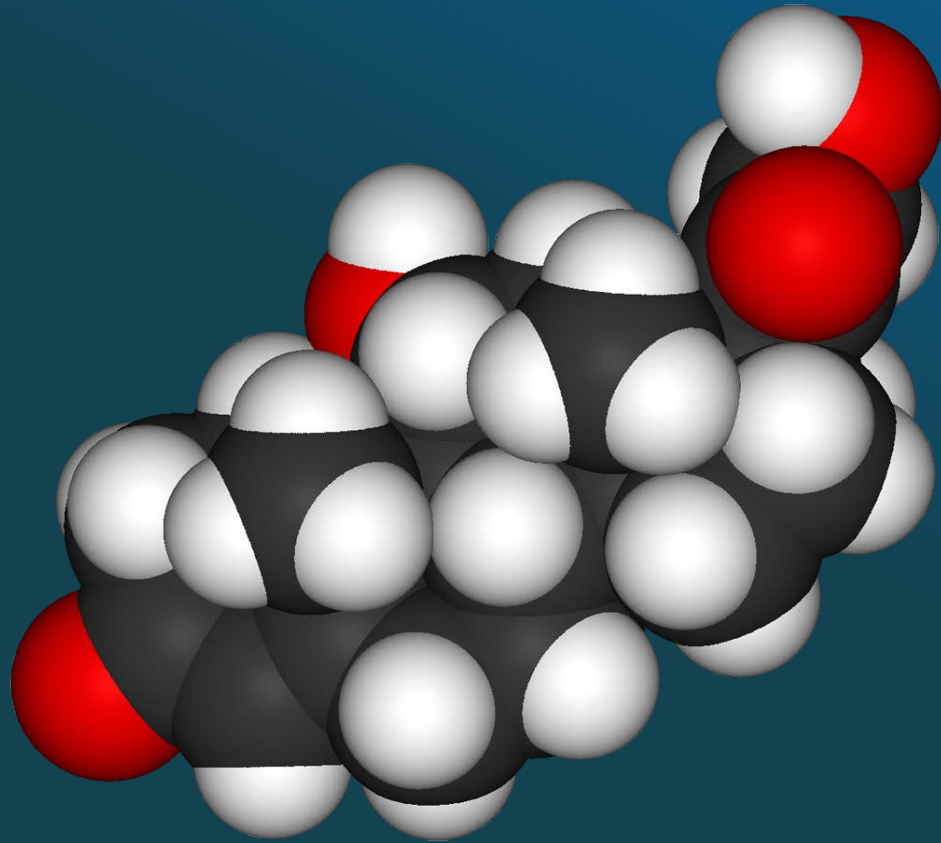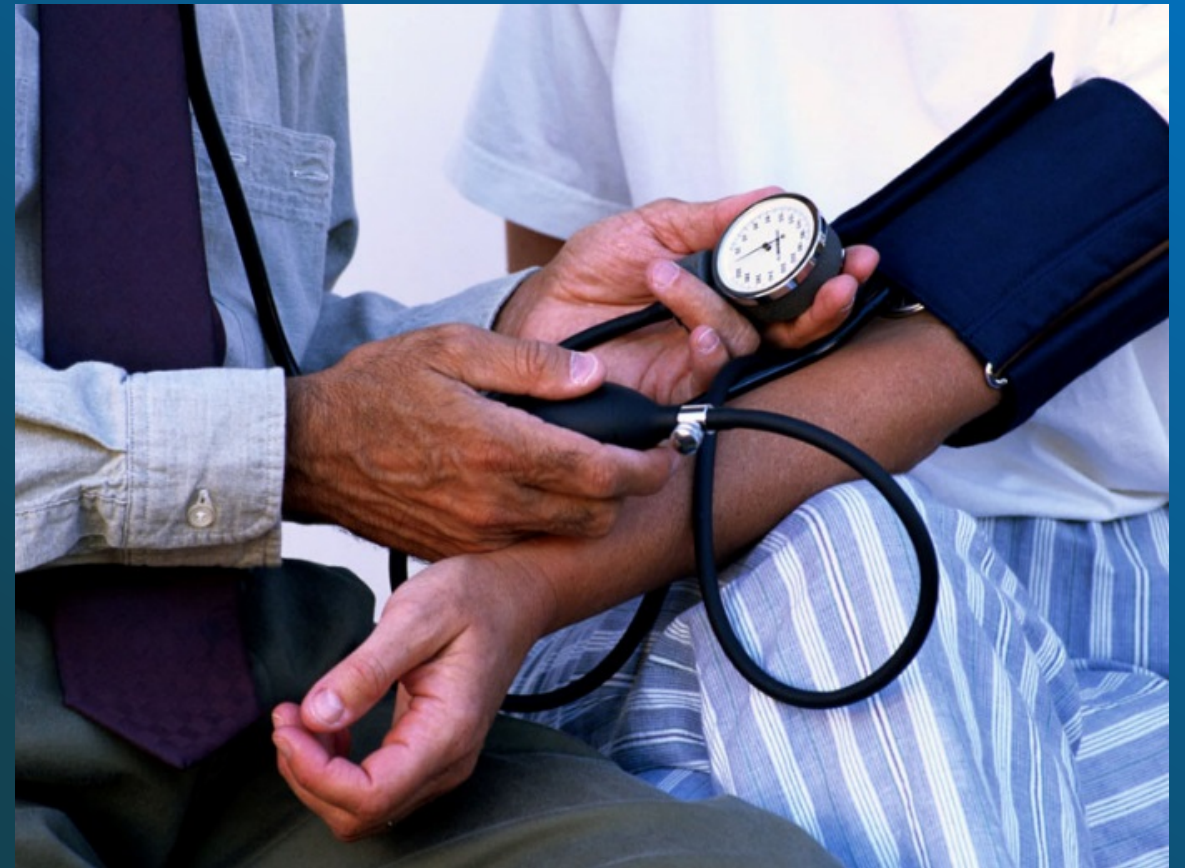



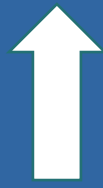

# Oxytocin

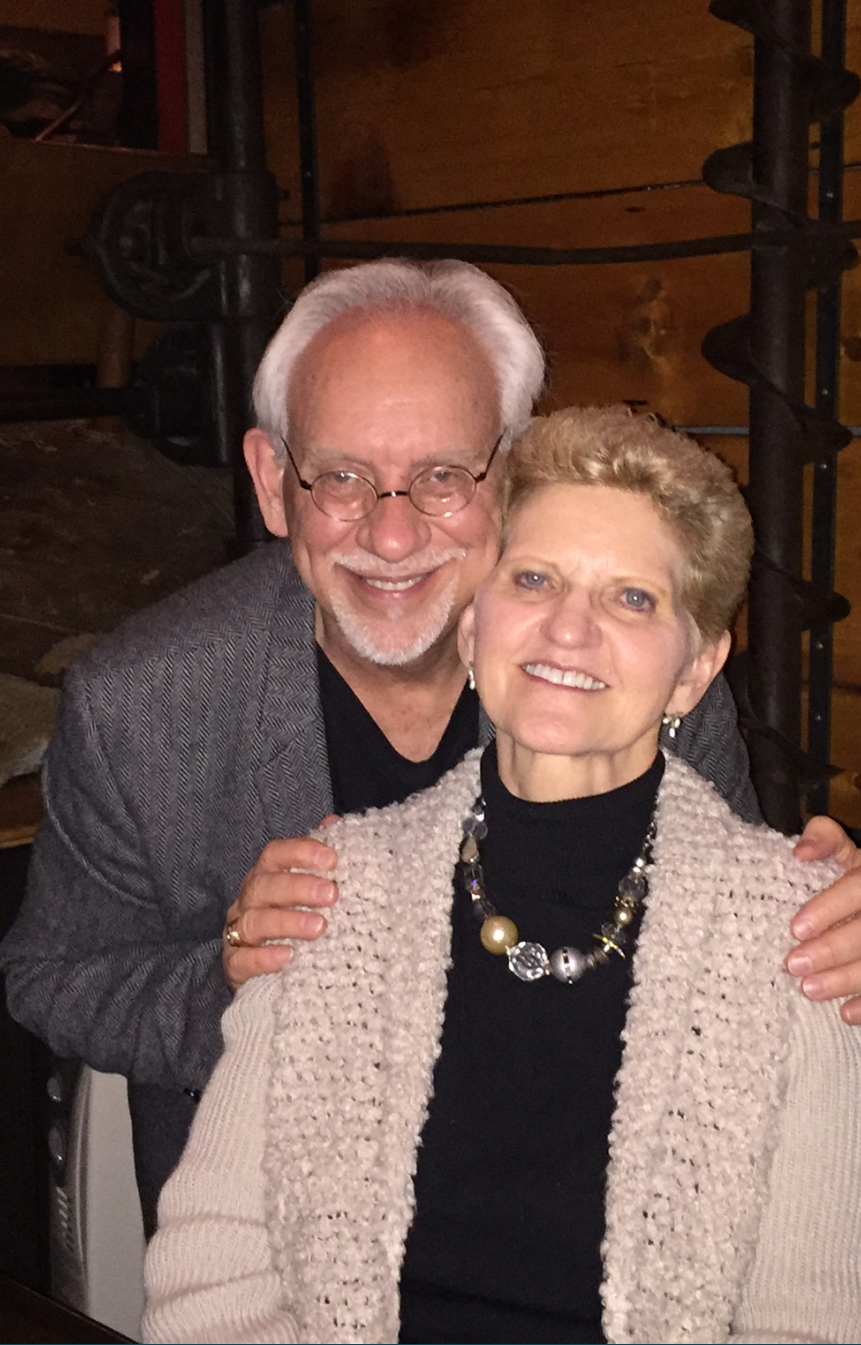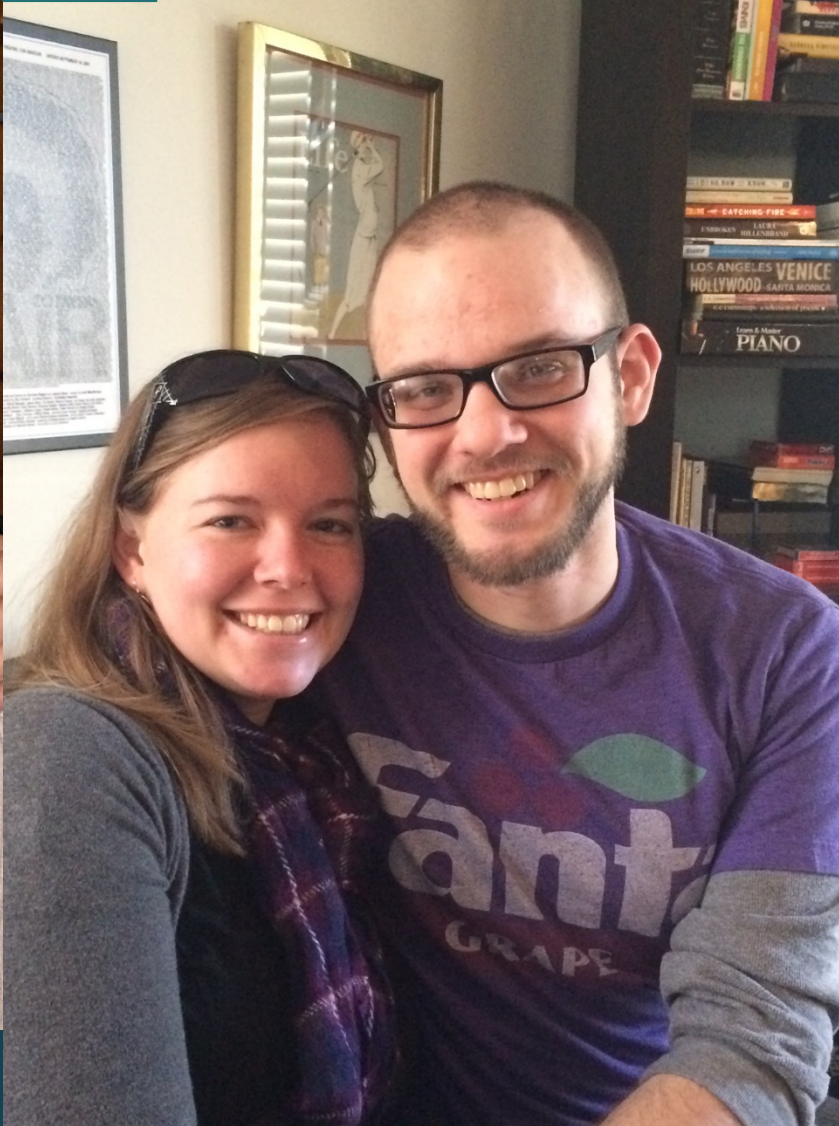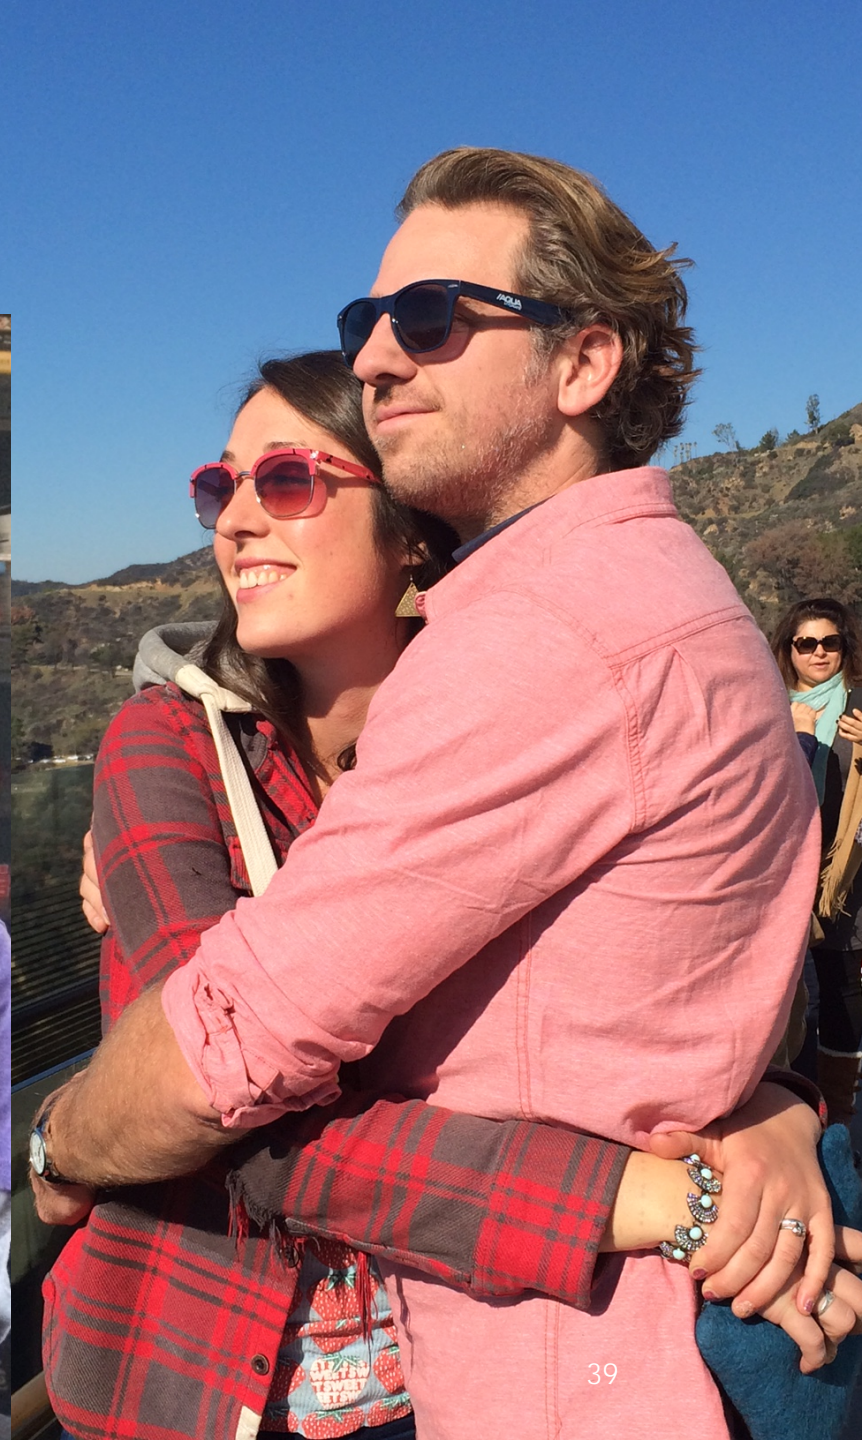



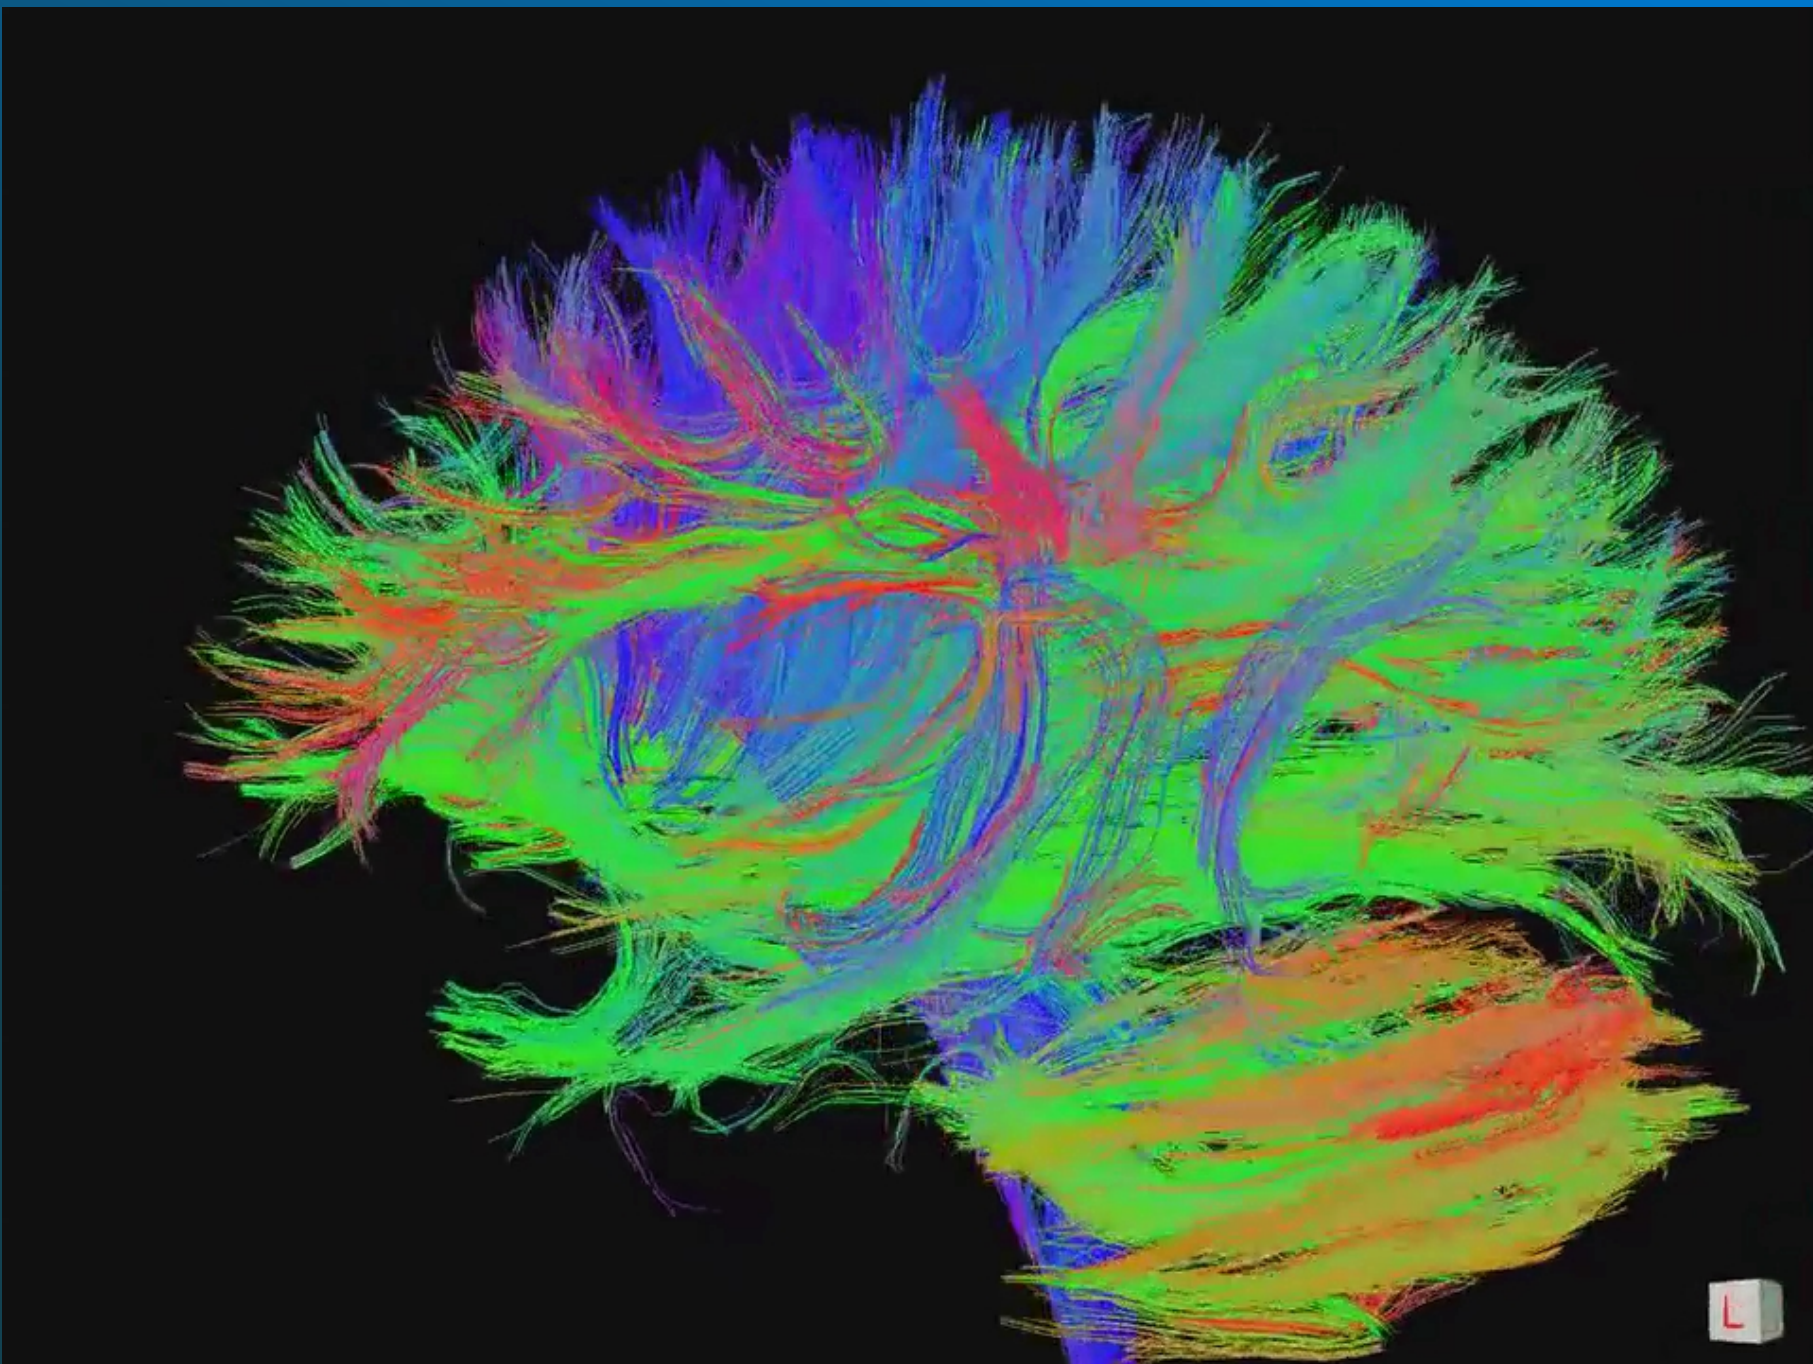



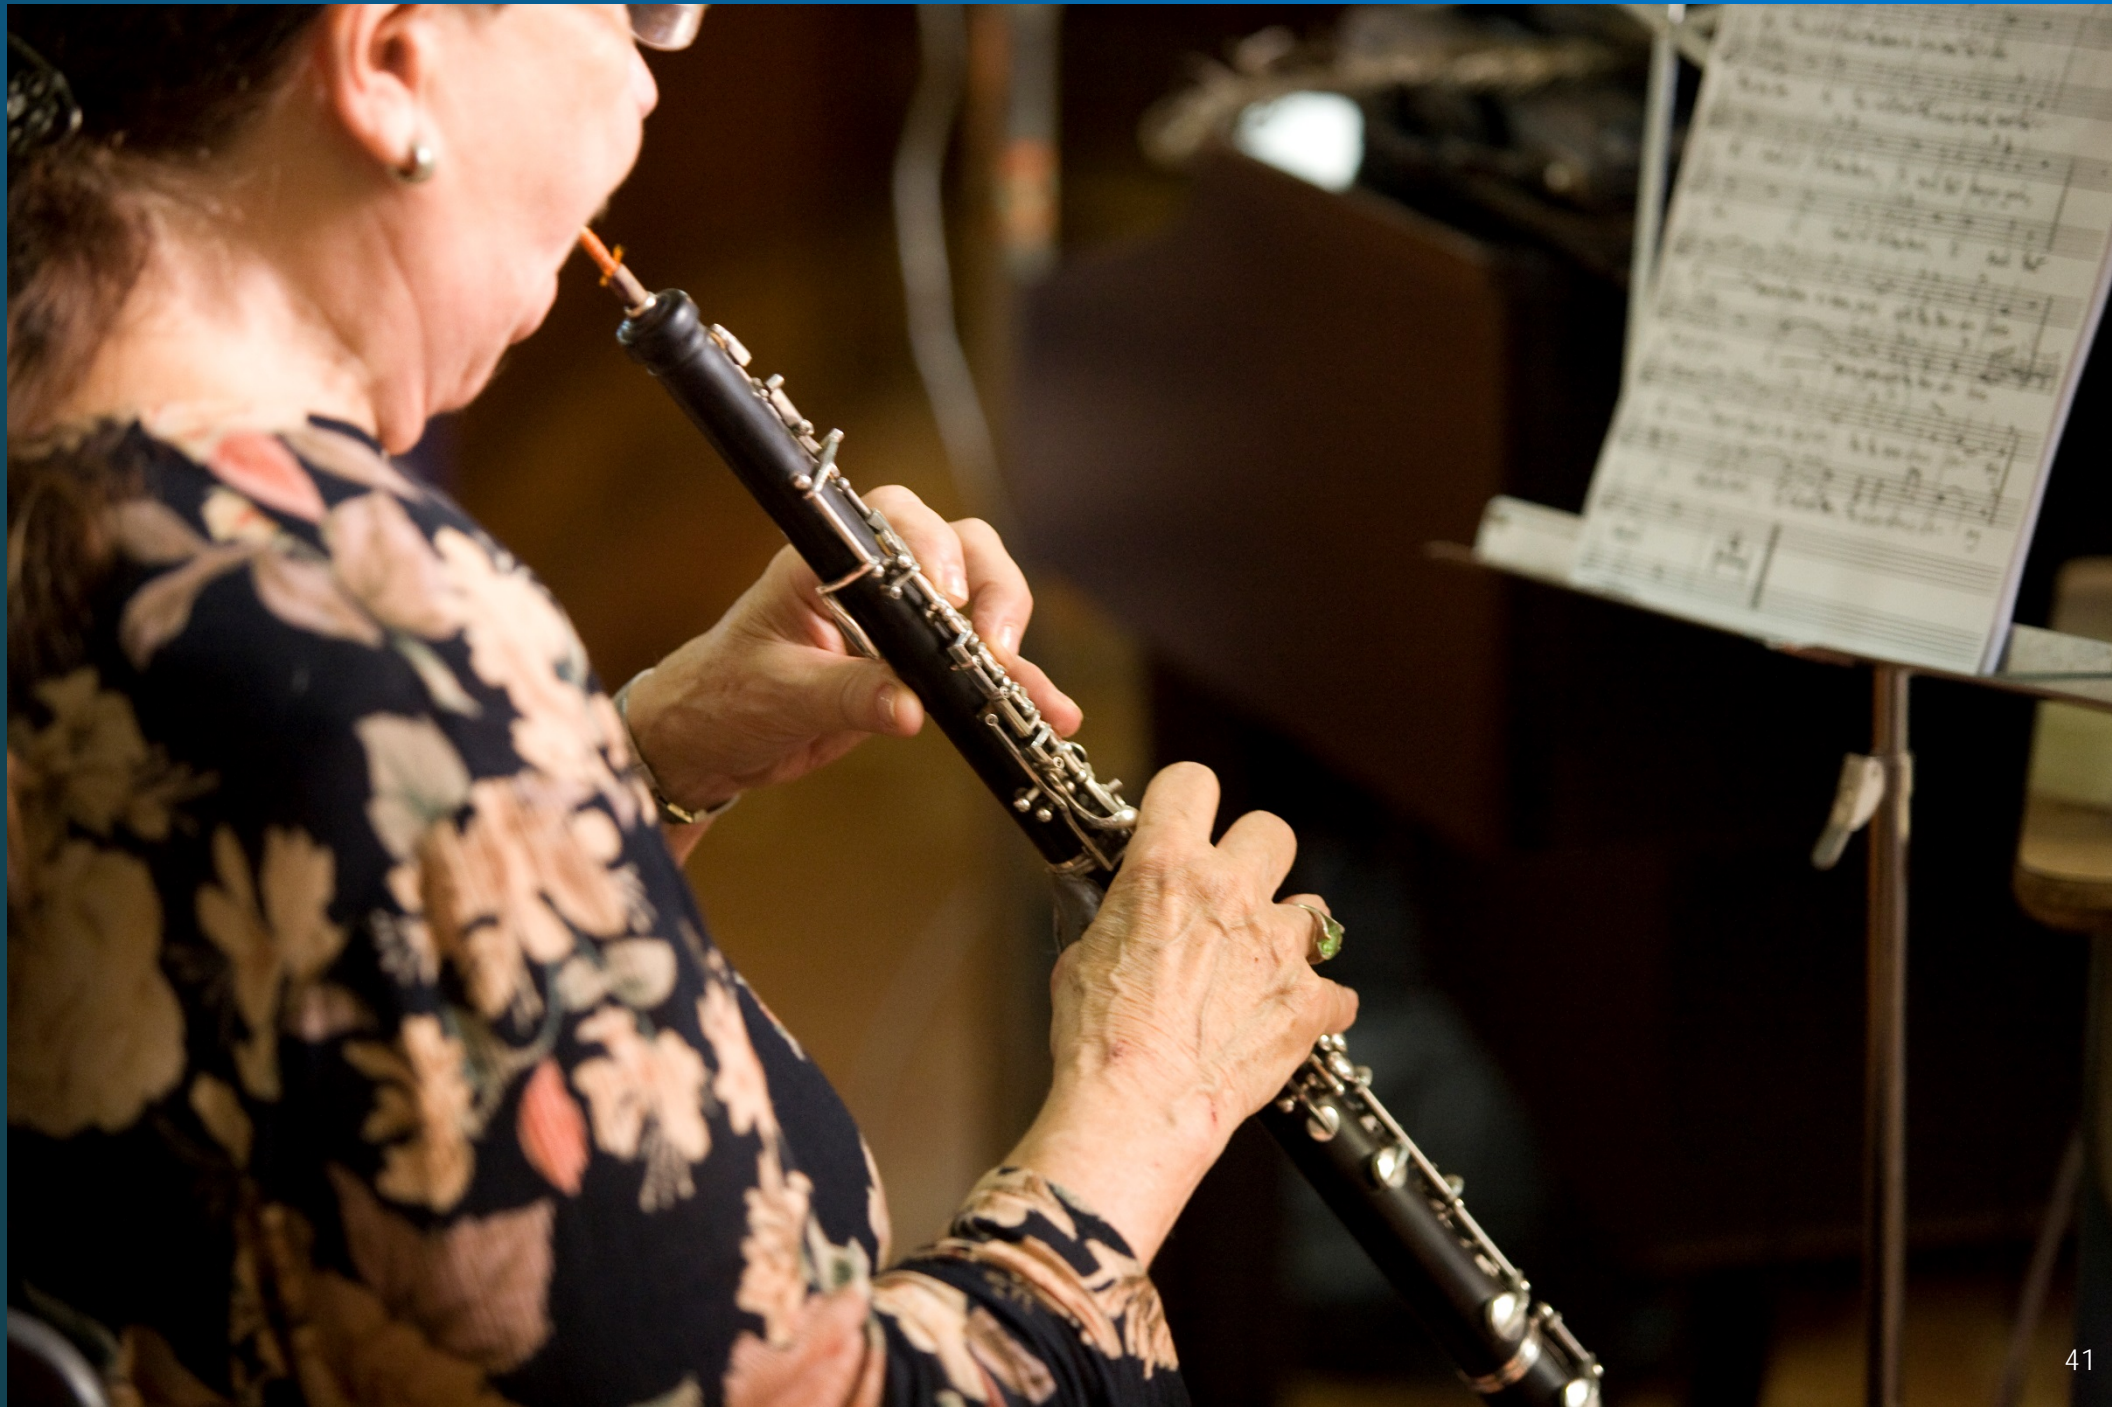



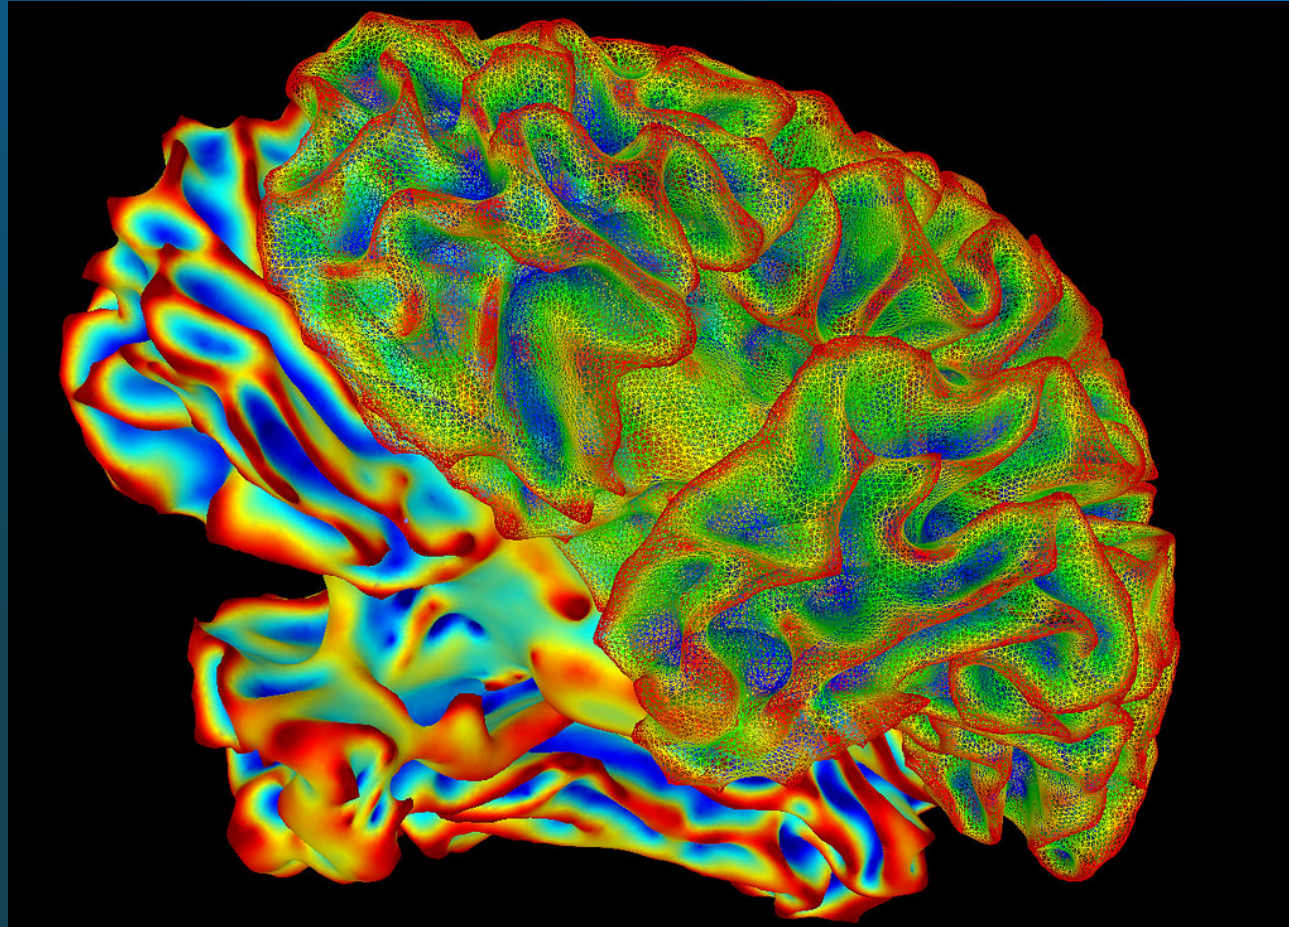

Credit: National Institute of Mental Health, National Institutes of Health

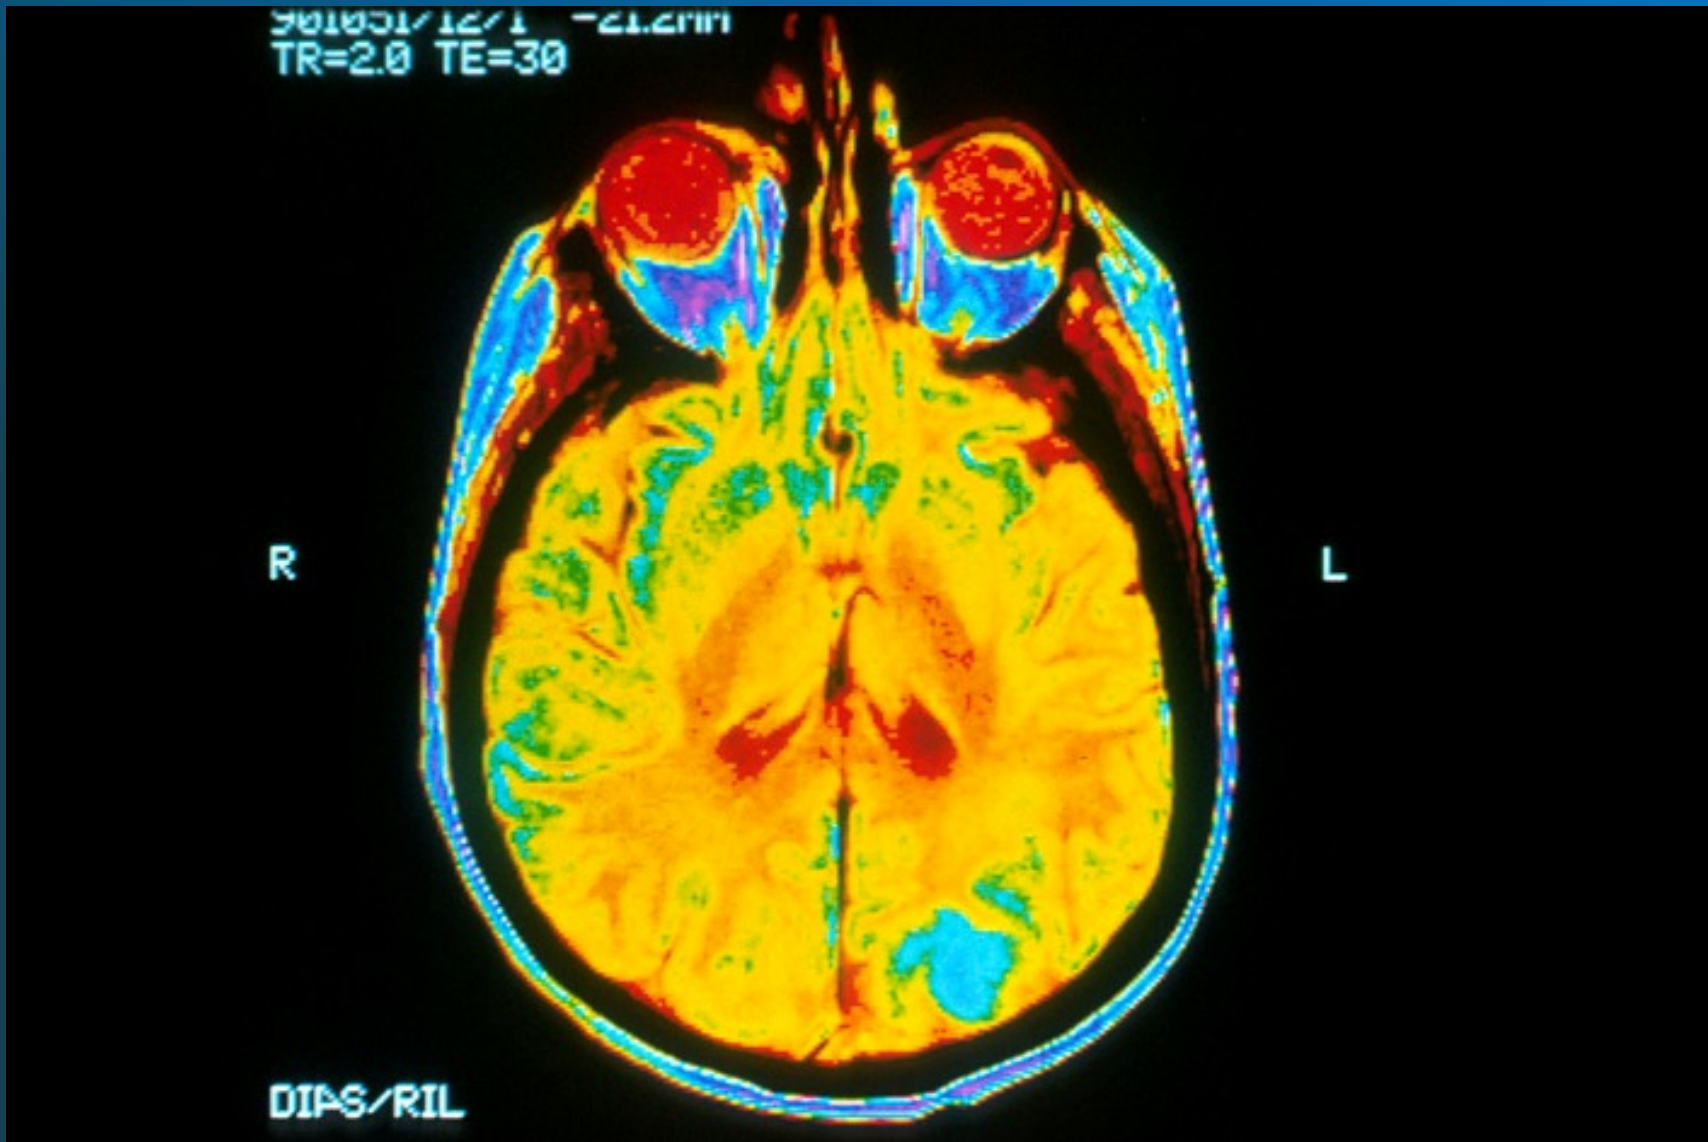



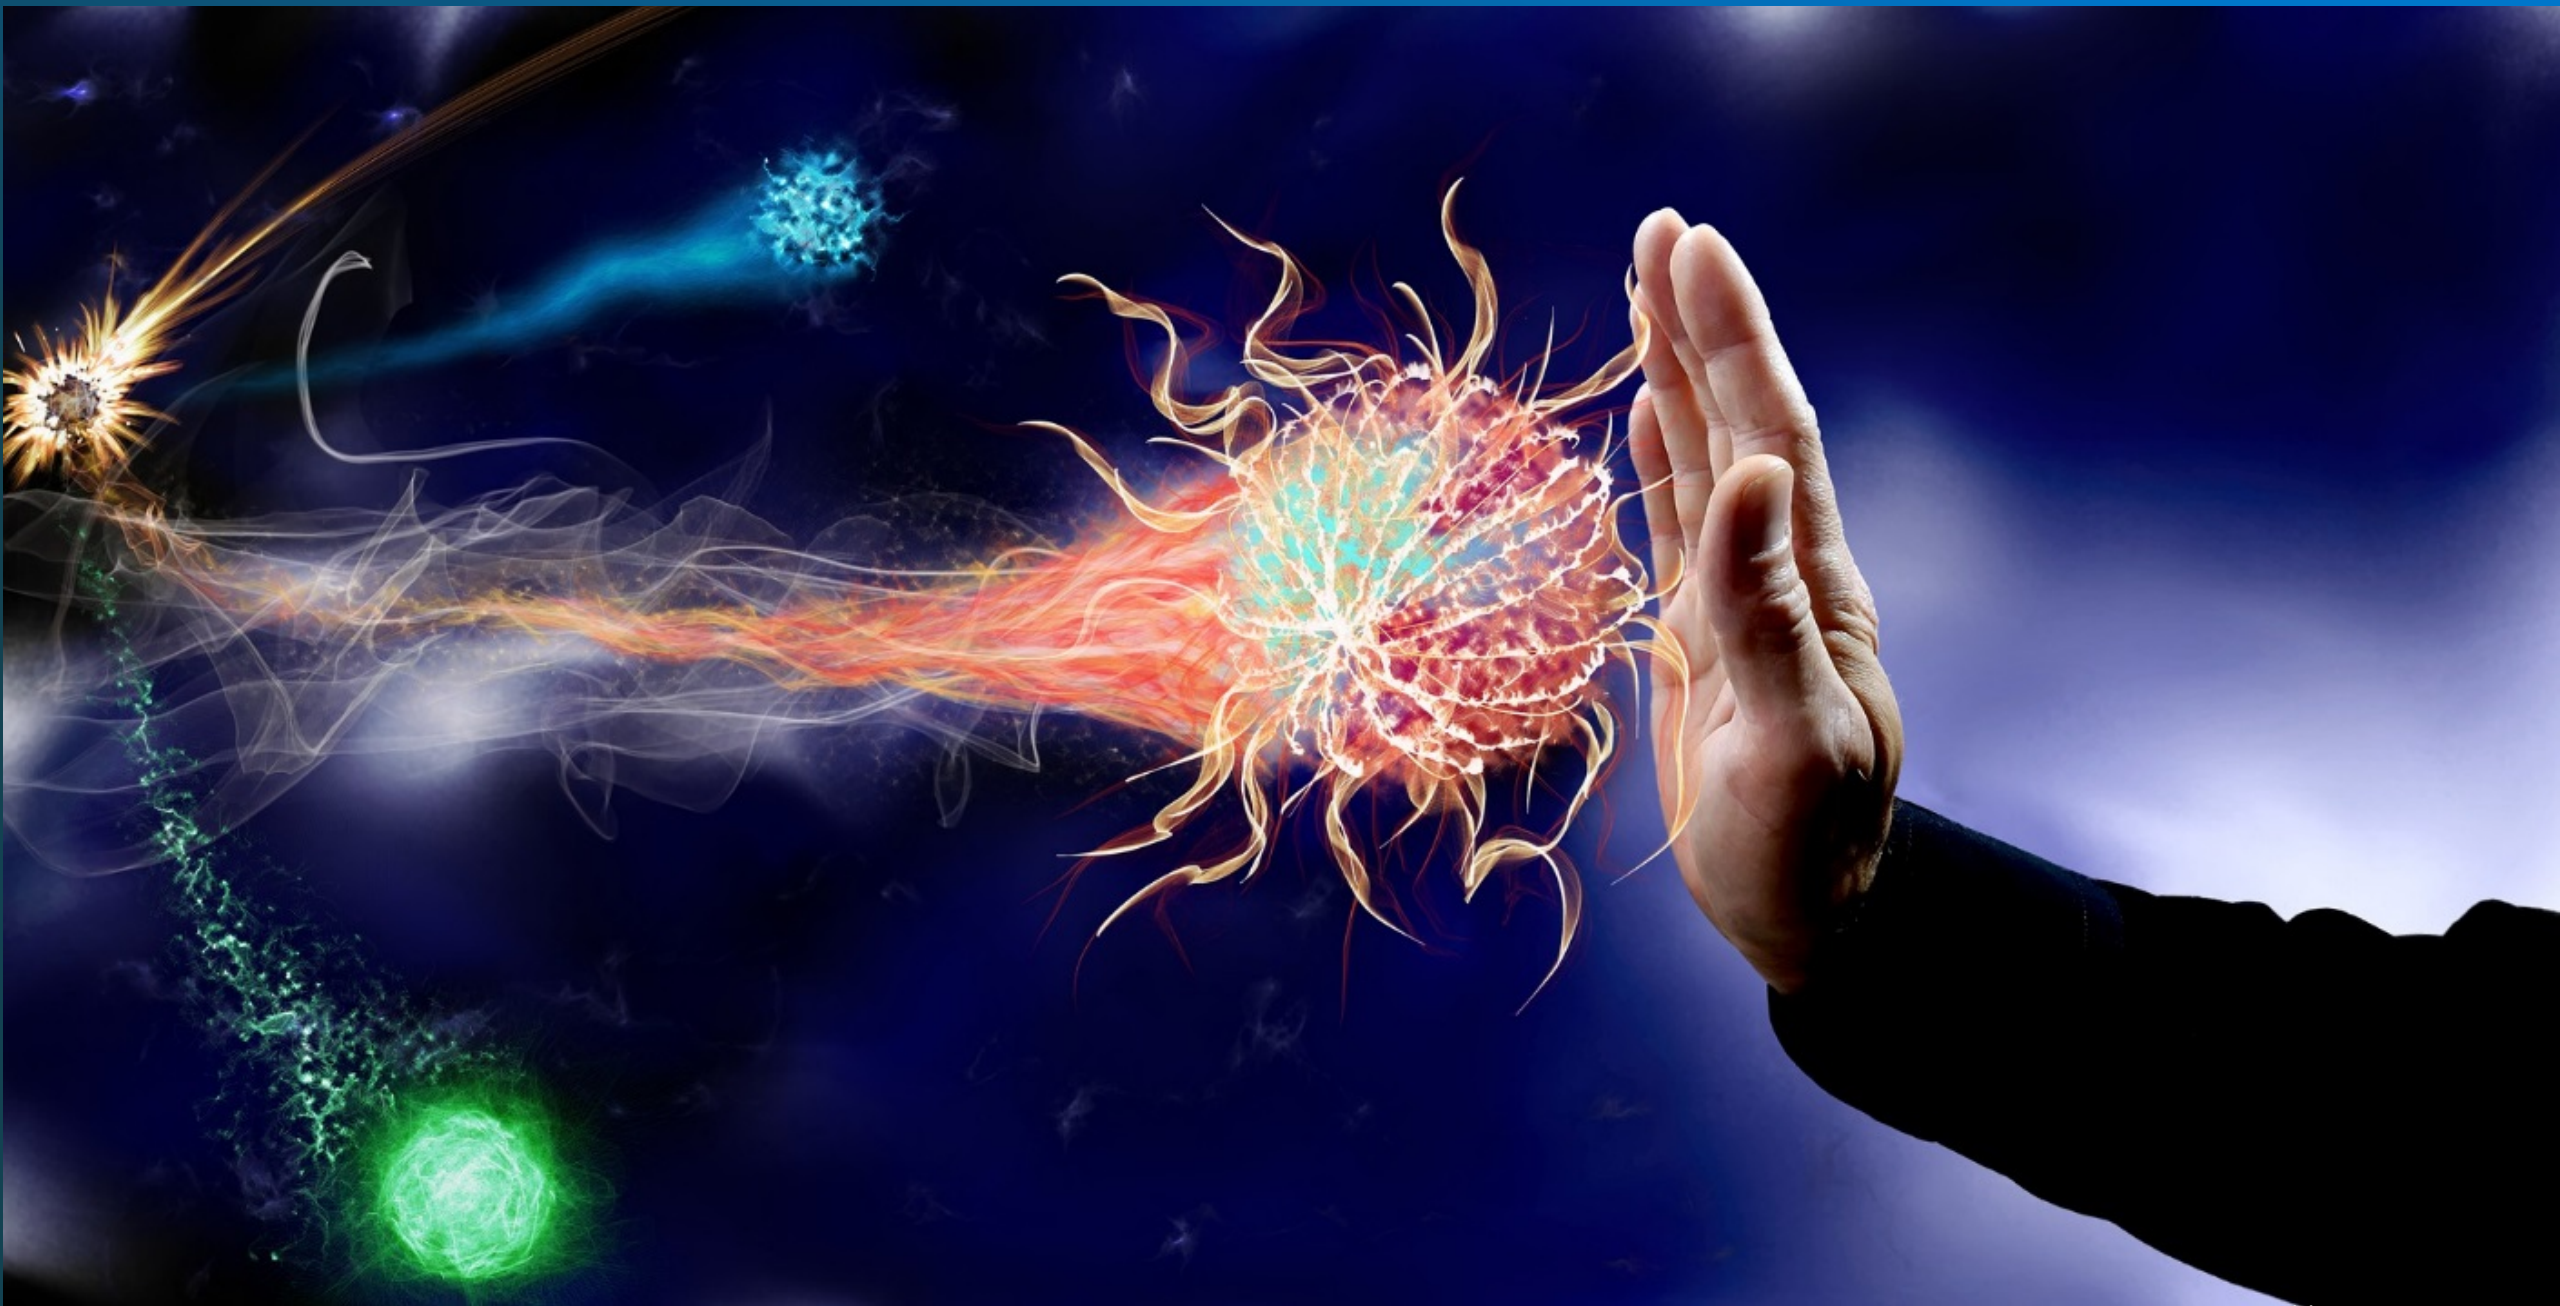

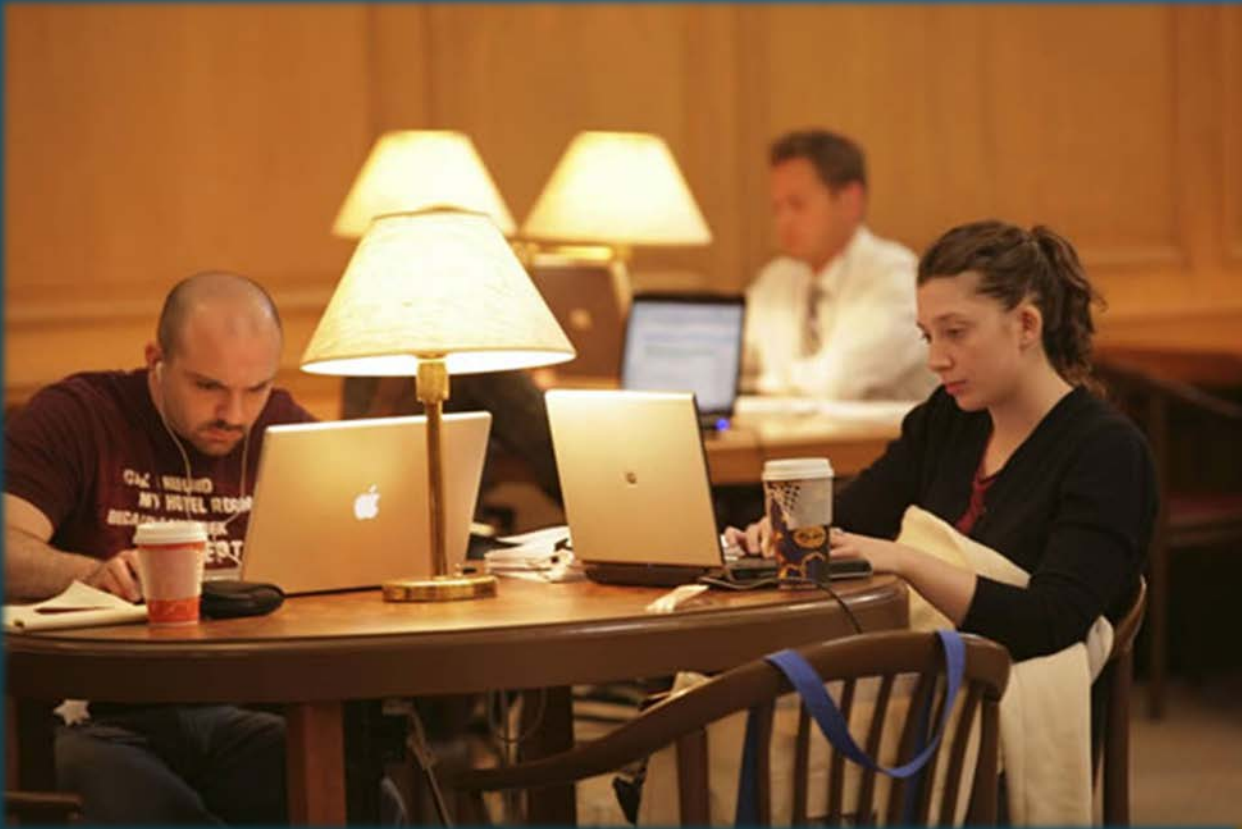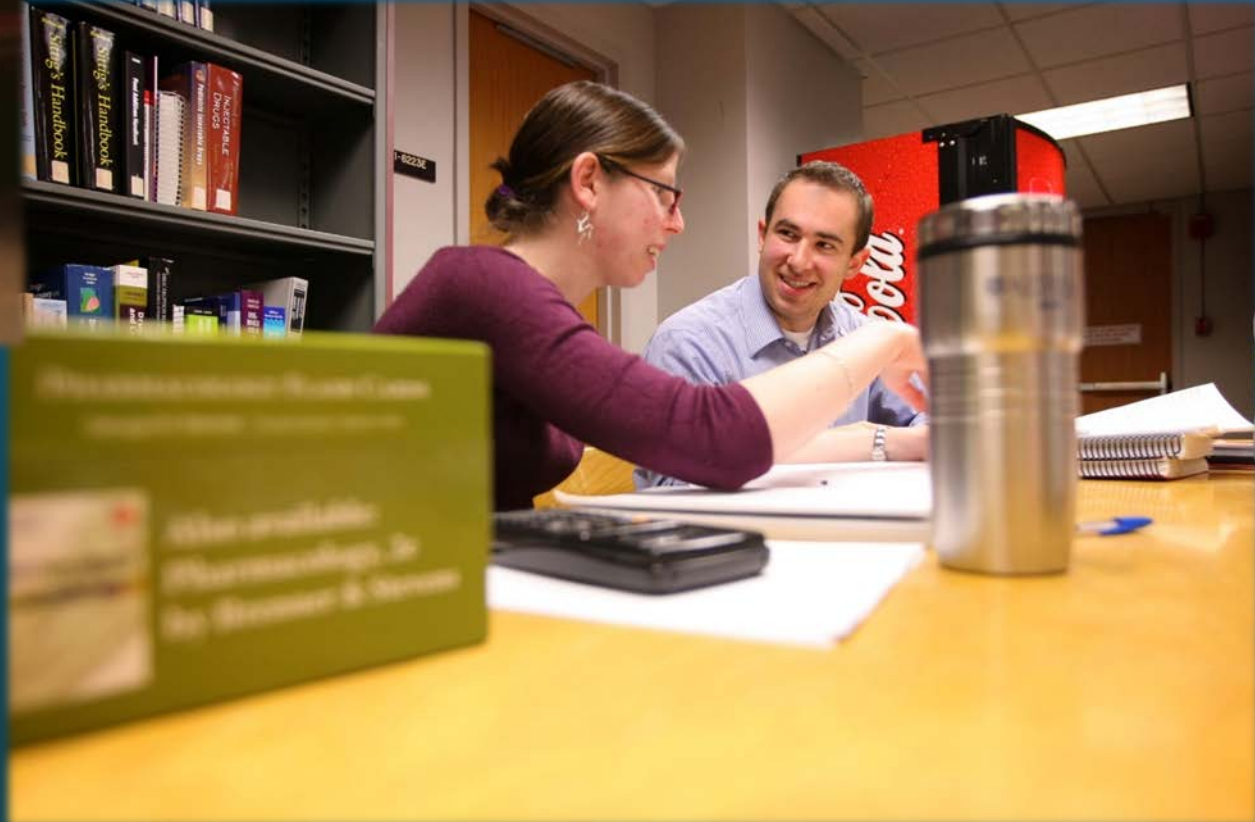



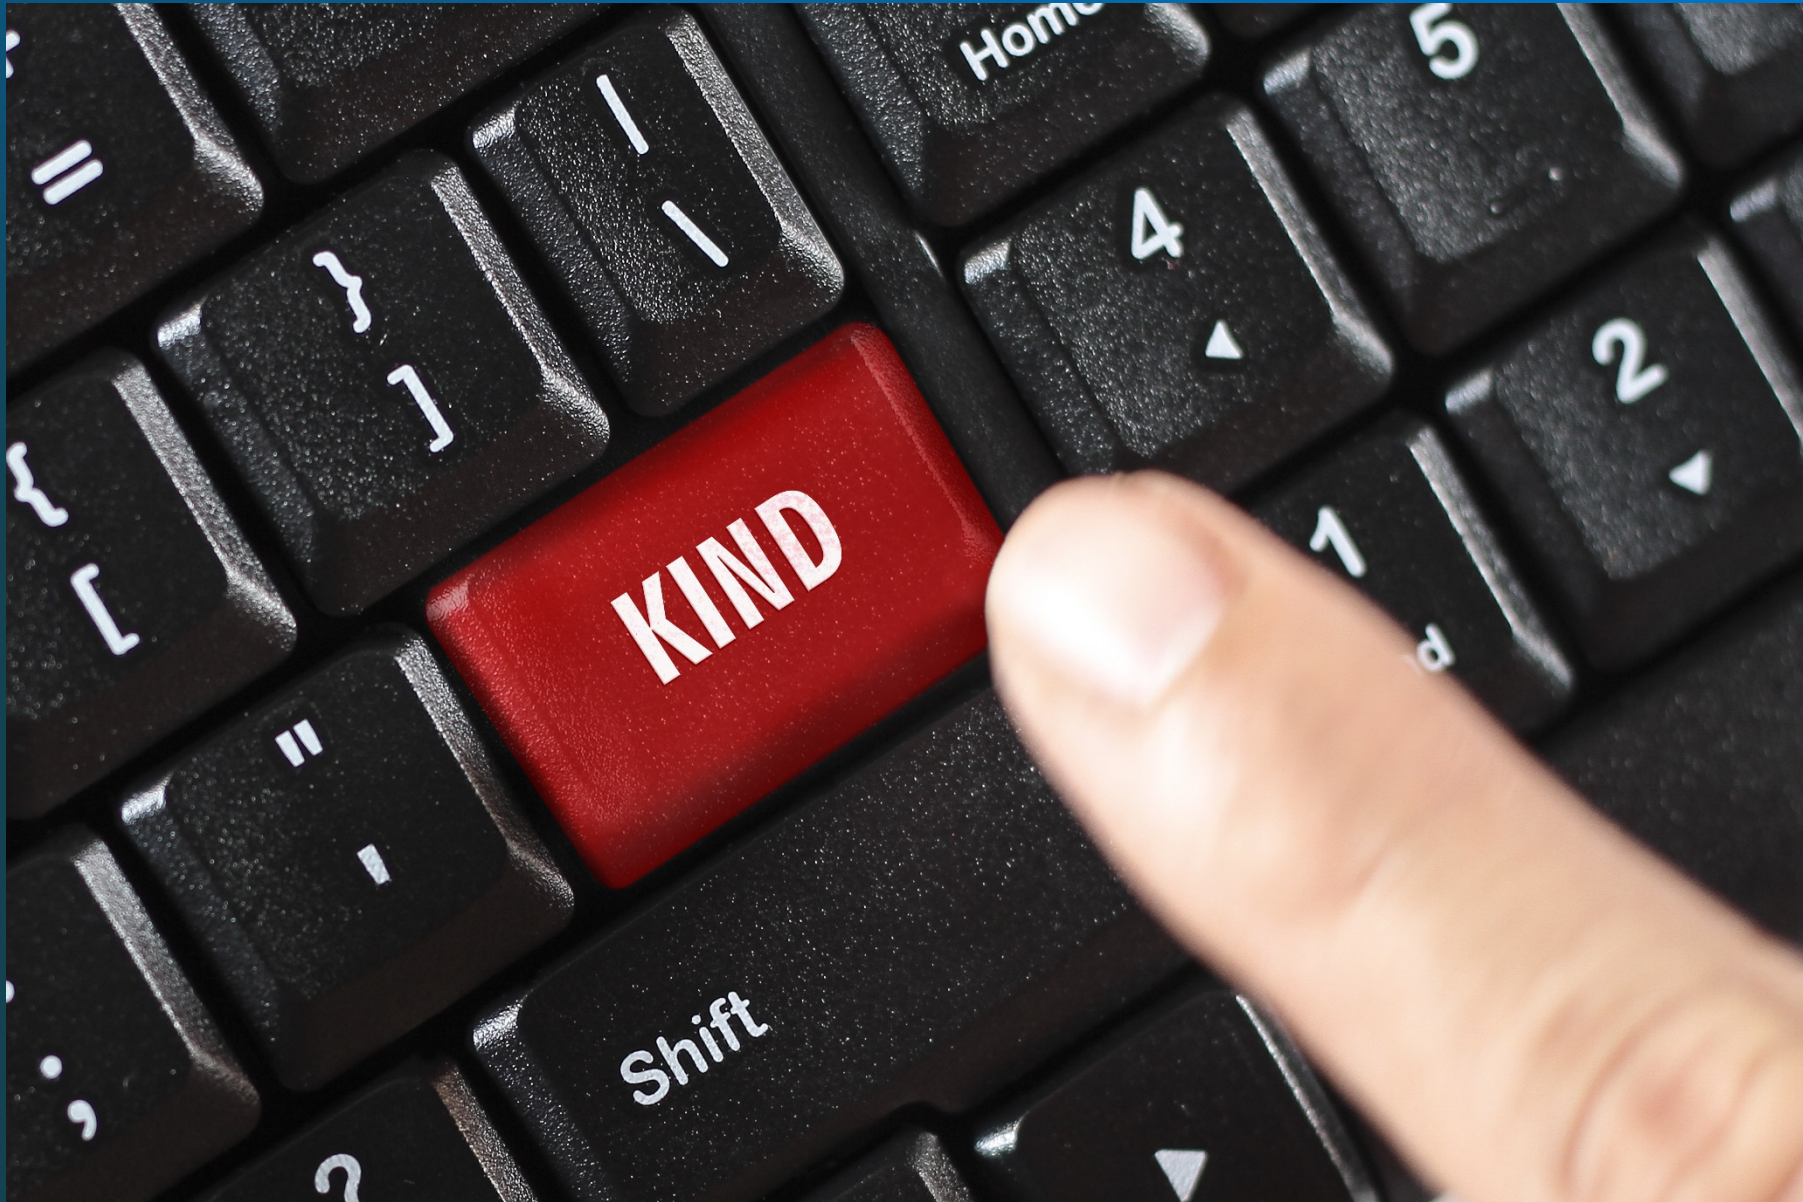

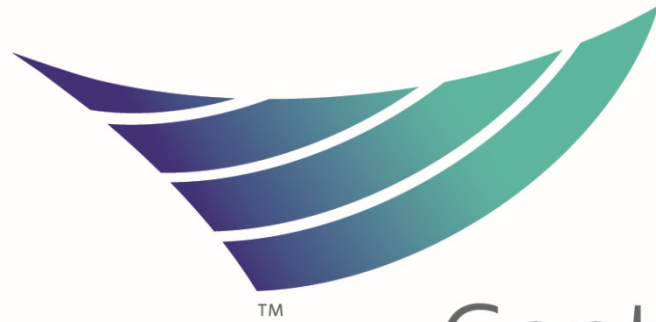

TM

Center for  
Creative  
Leadership®

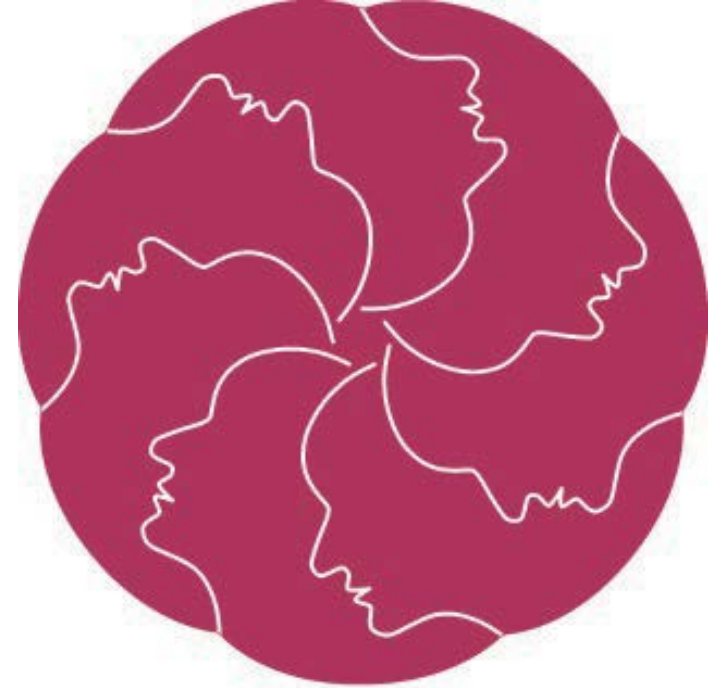

MIND & LIFE  
I N S T I T U T E

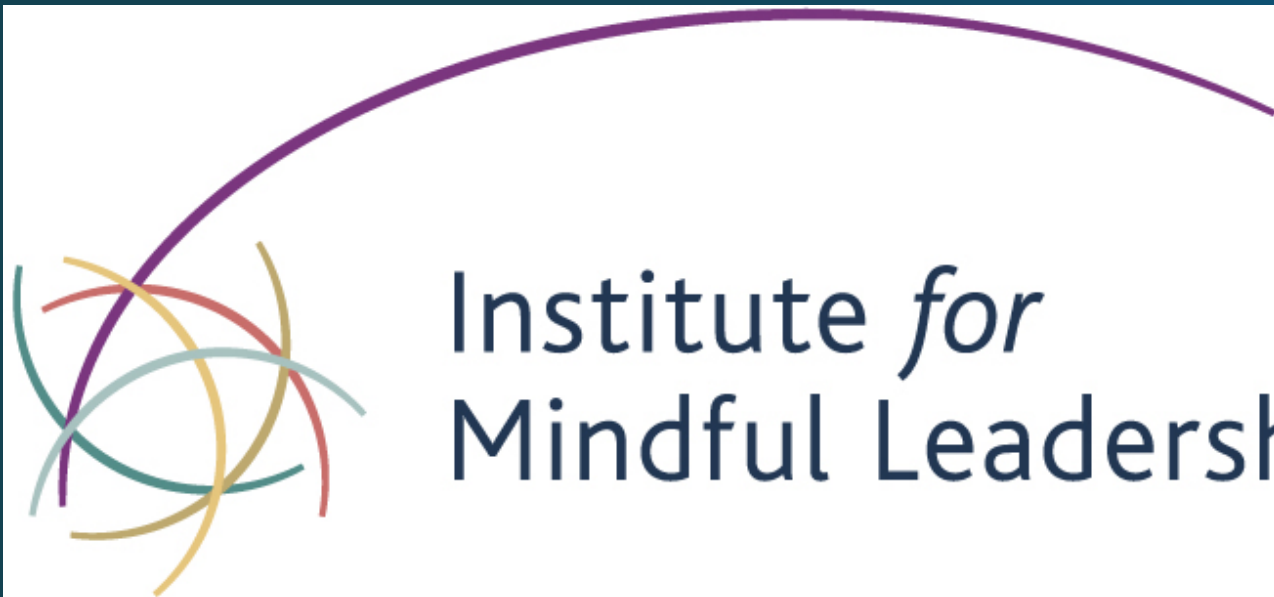

Institute *for*  
Mindful Leadership



# Google



Google Search

I'm Feeling Lucky

FOREWORDS BY JON KABAT-ZINN AND DANIEL GOLEMAN

NEW YORK  
TIMES  
BESTSELLER

# Search Inside Yourself

THE UNEXPECTED PATH TO ACHIEVING  
SUCCESS, HAPPINESS (AND WORLD PEACE)

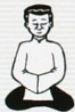

CHADE-MENG TAN

"This book and the course it's based on represent one of the greatest aspects of Google's culture—that one individual with a great idea can really change the world."

—ERIC SCHMIDT, executive chairman of Google

THE #1 BESTSELLER  
THE TENTH ANNIVERSARY EDITION

LOOK  
INSIDE

# DANIEL GOLEMAN

Author of *Social Intelligence*

THE GROUNDBREAKING BOOK  
THAT REDEFINES WHAT IT  
MEANS TO BE SMART

# Emotional Intelligence

WHY IT CAN MATTER  
MORE THAN IQ

Copyrighted Material  
BESTSELLING AUTHOR OF  
*EMOTIONAL INTELLIGENCE*

# DANIEL GOLEMAN

THE REVOLUTIONARY BOOK  
BY THE AUTHOR WHO REDEFINED  
WHAT IT MEANS TO BE SMART

# Social Intelligence

THE NEW SCIENCE OF  
HUMAN RELATIONSHIPS

Copyrighted Material



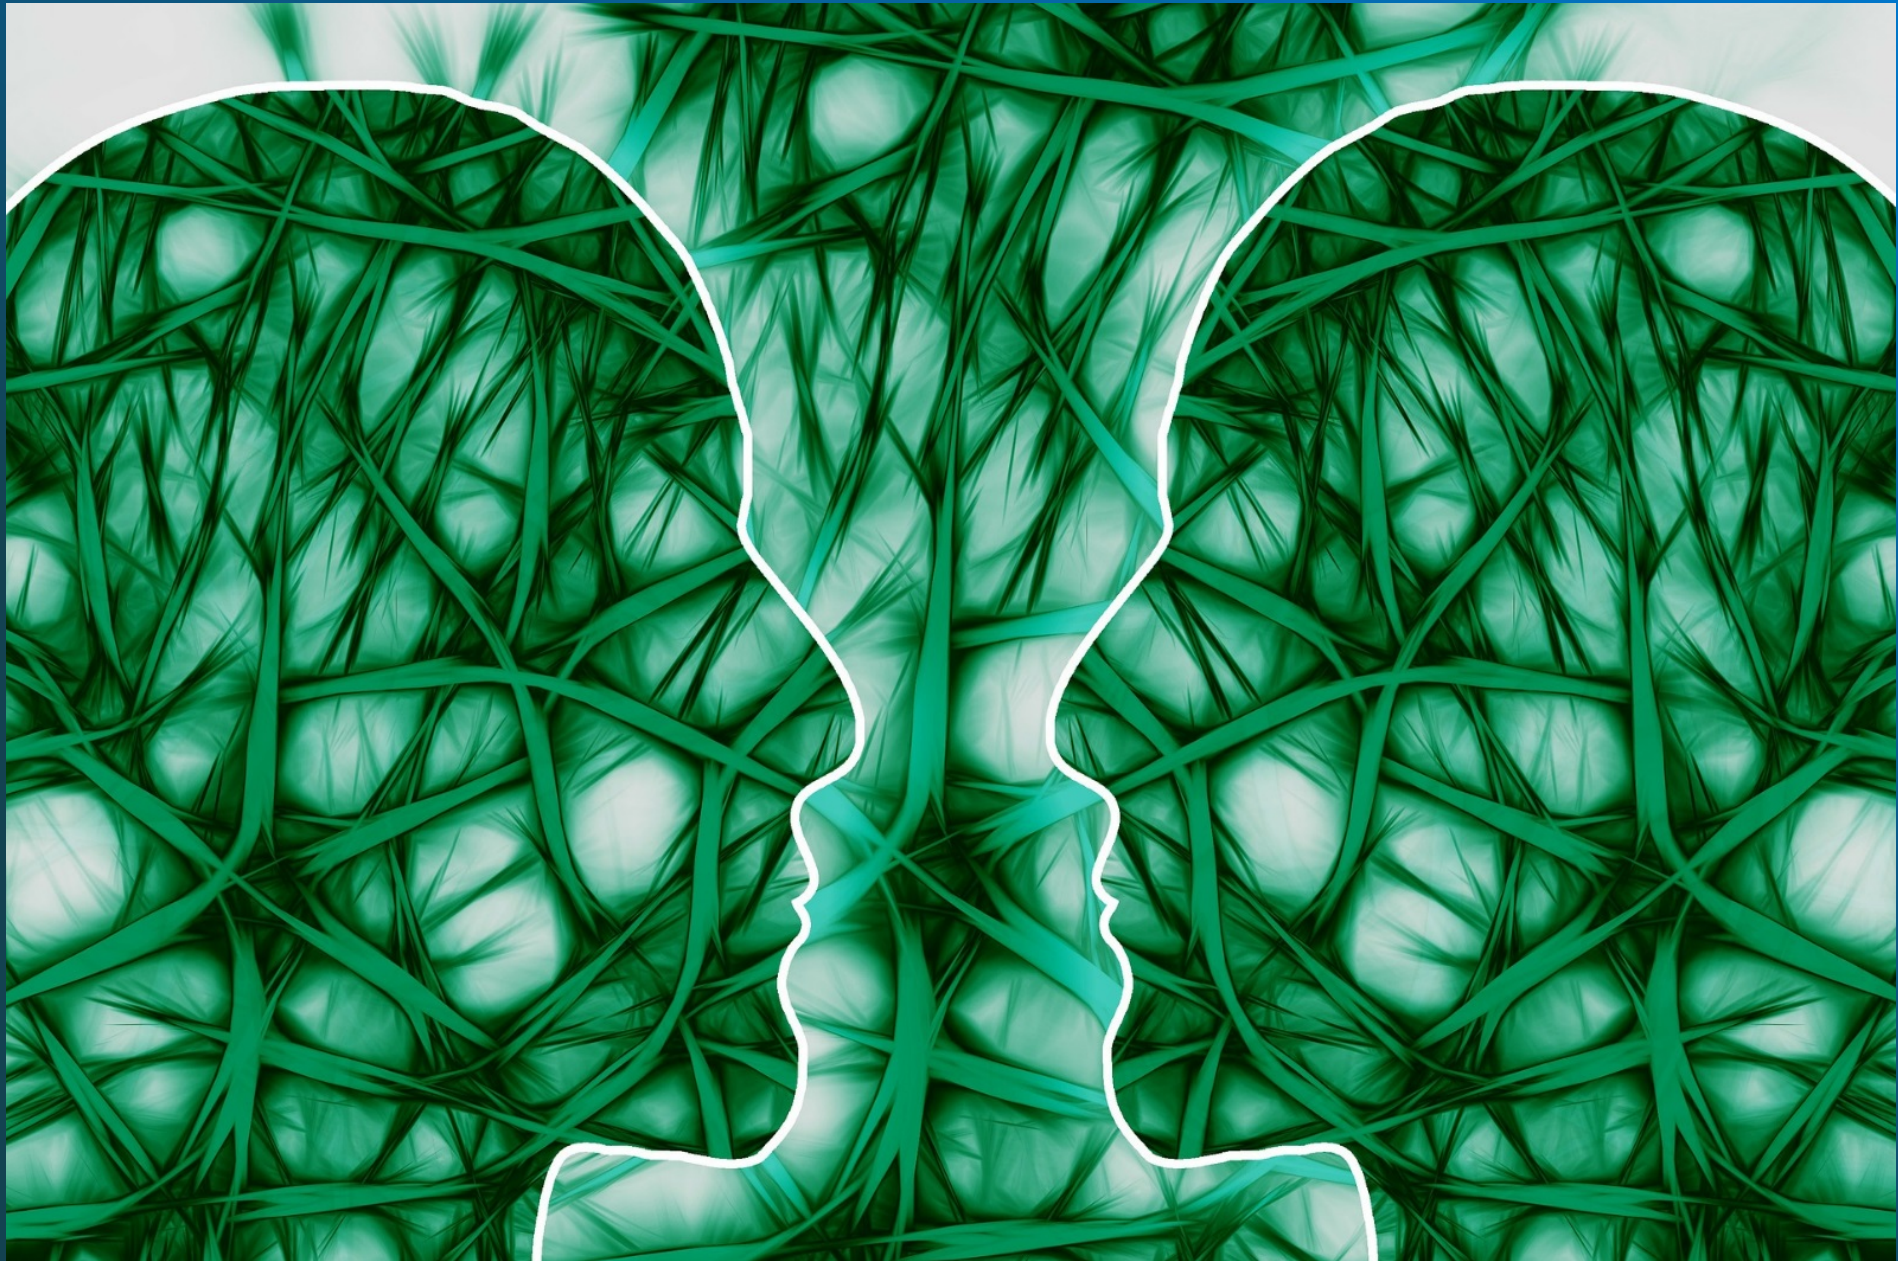

# Cognitive culture

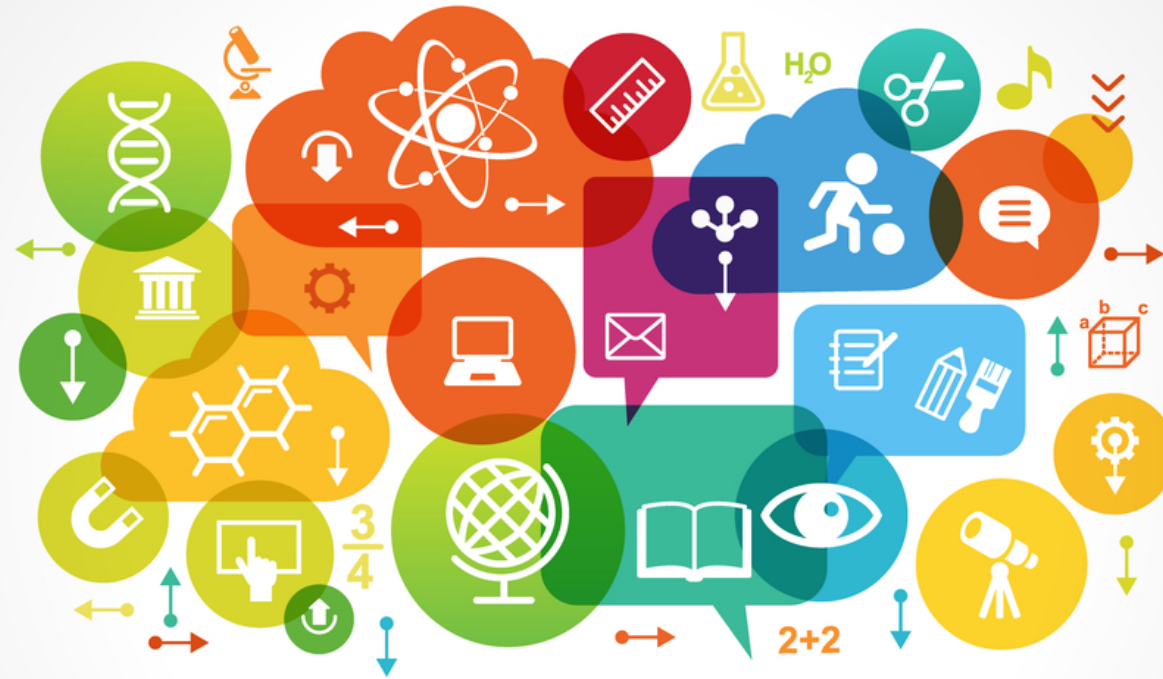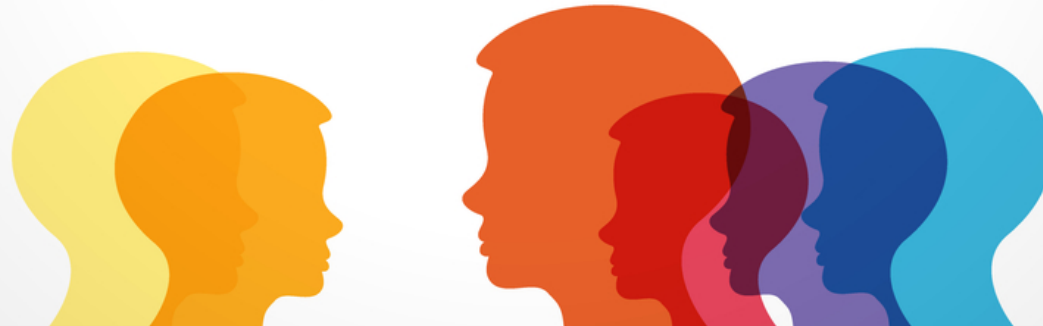



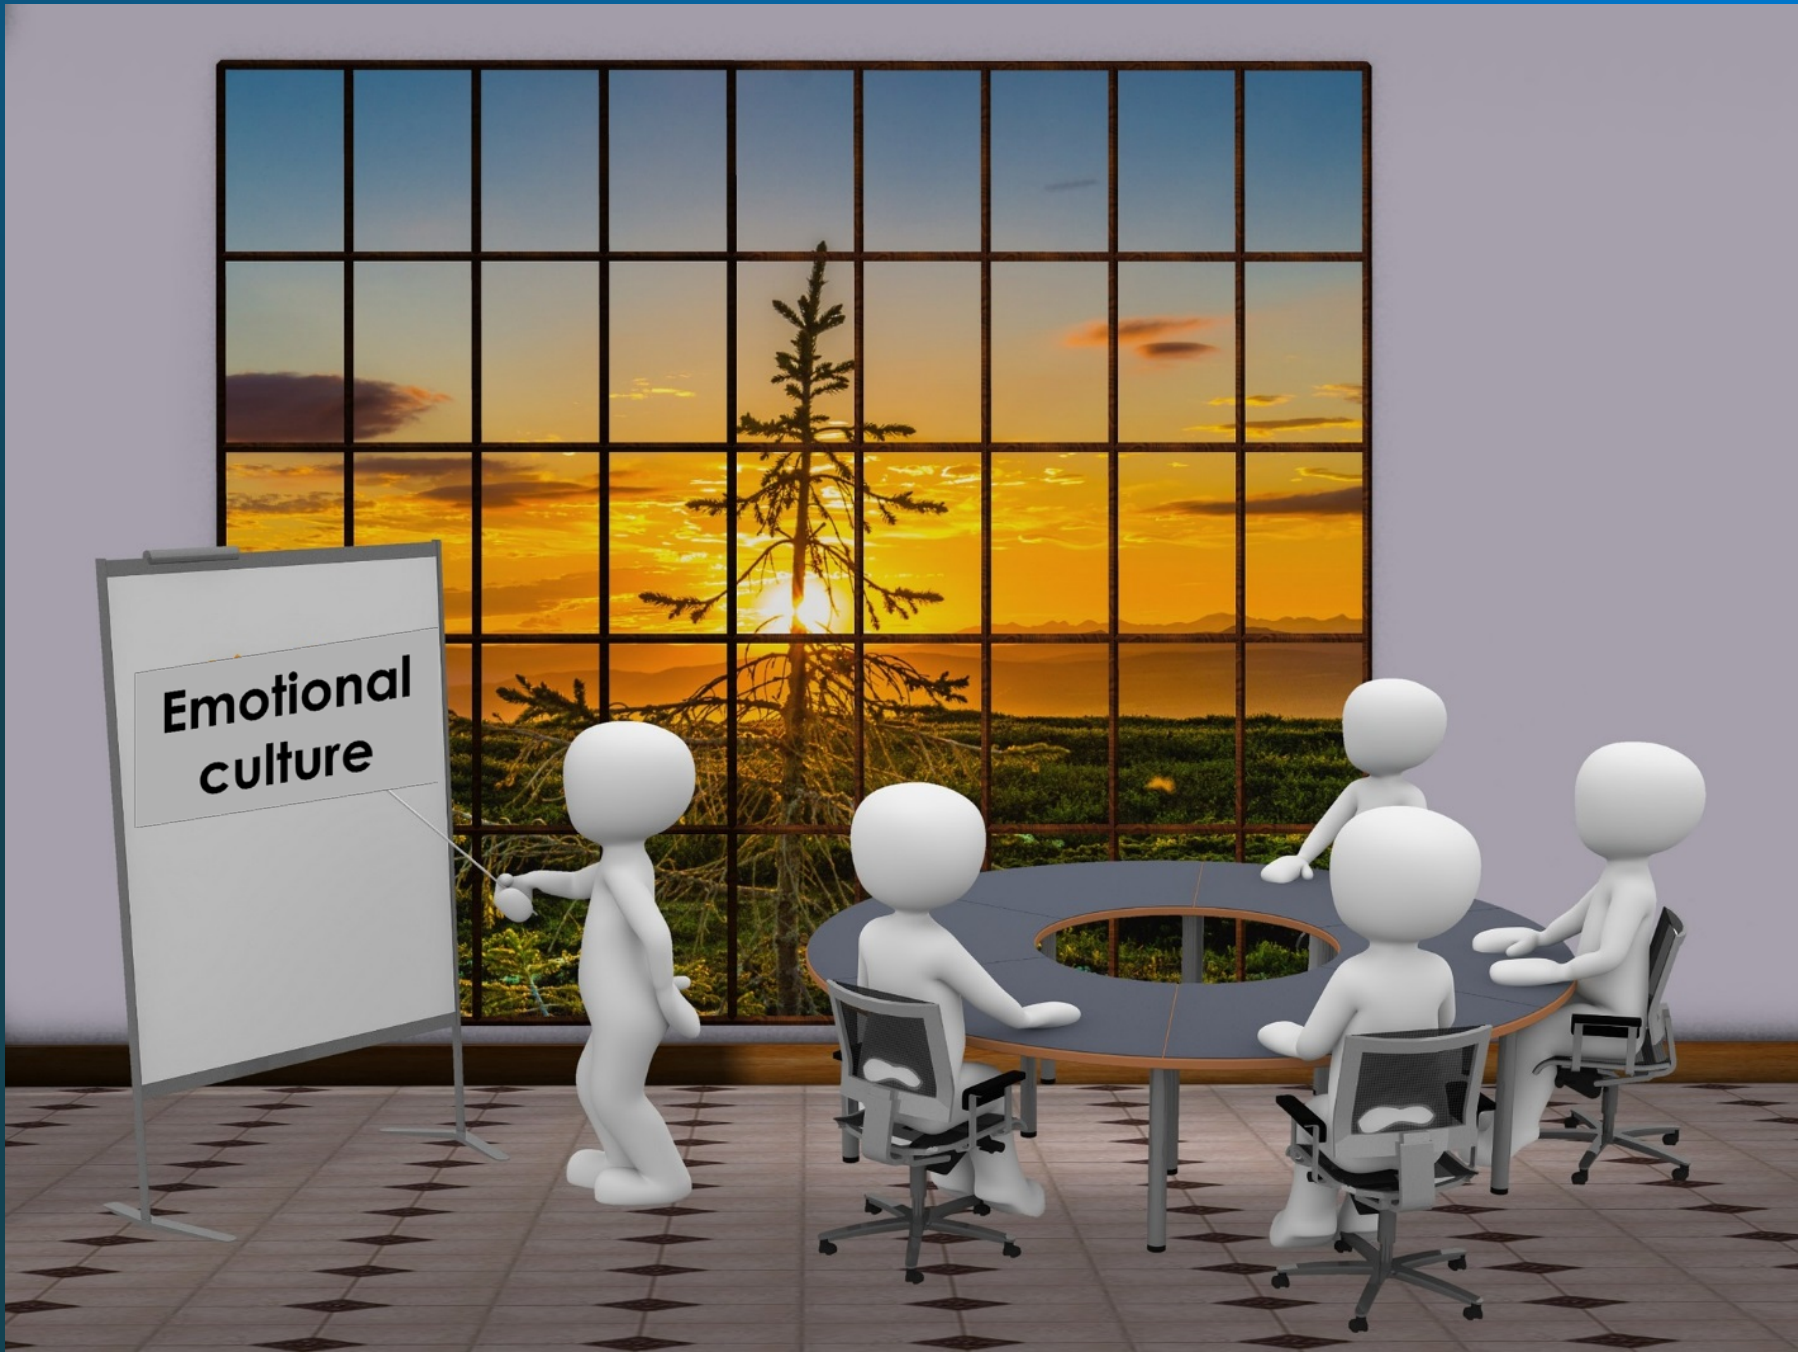

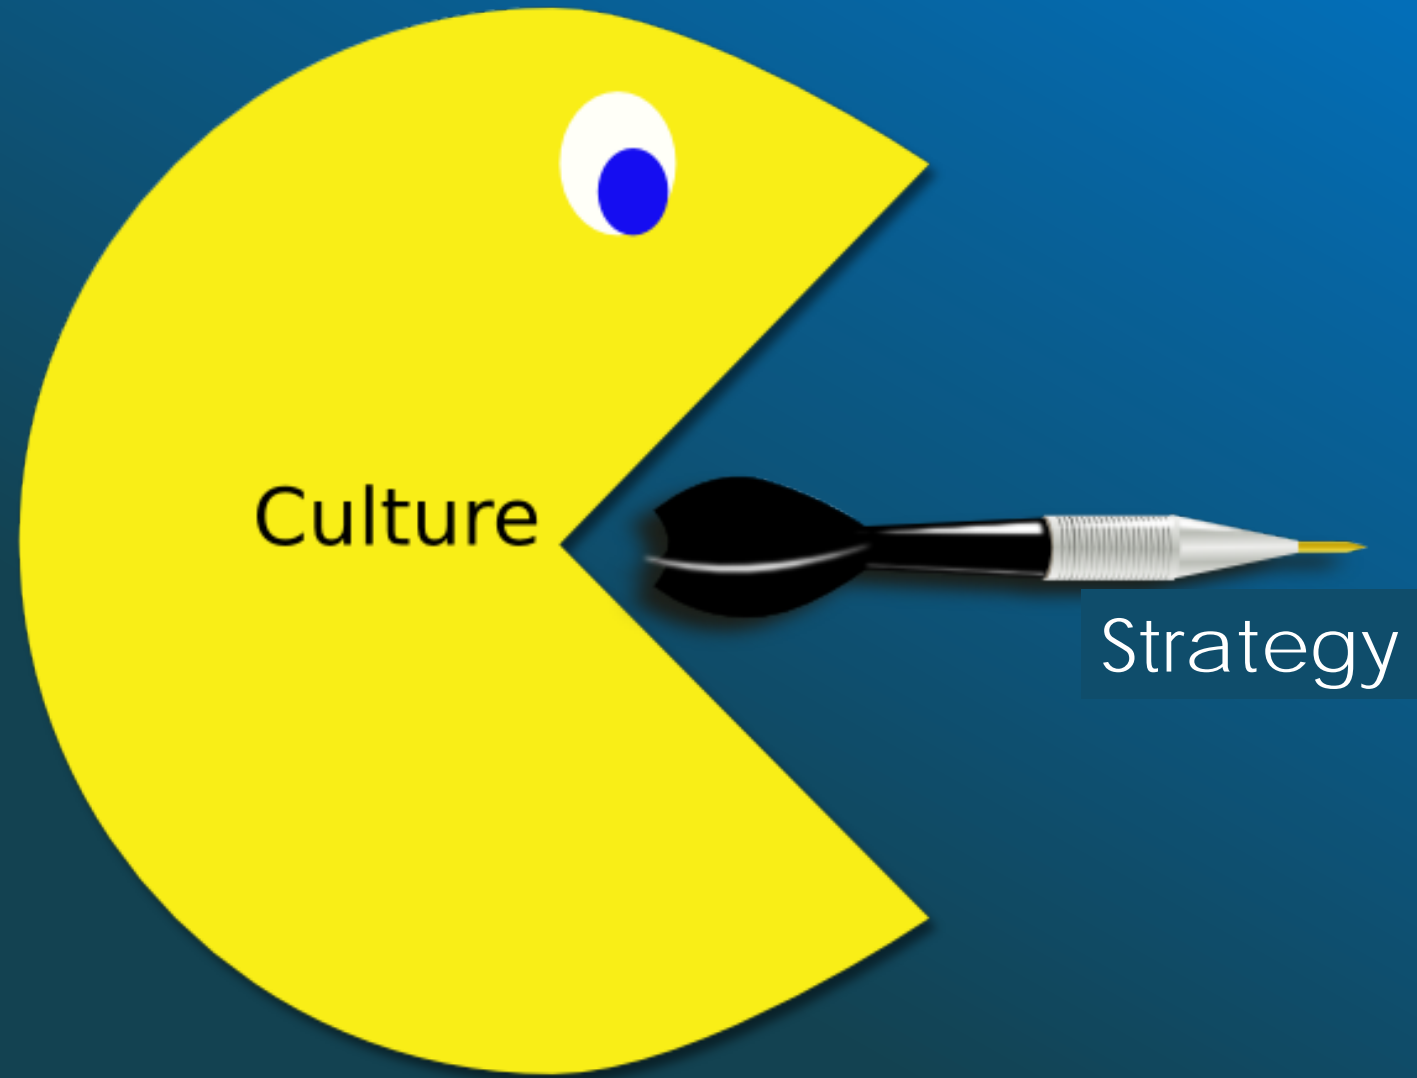



Nobody cares  
how much you  
know until they  
know how  
much you care.

-- Theodore Roosevelt

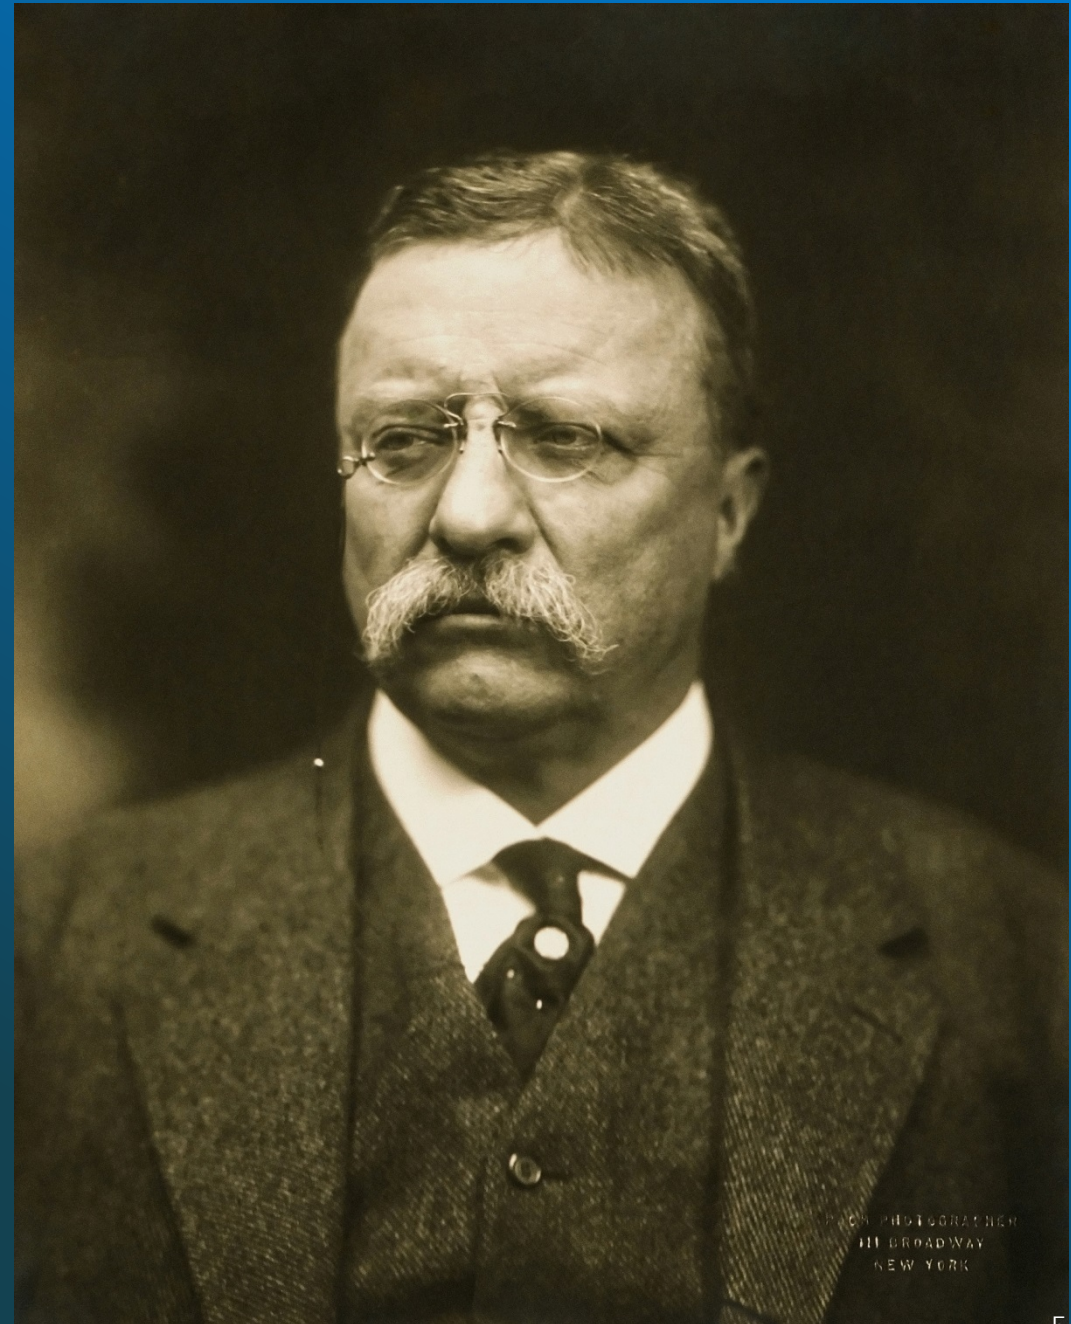

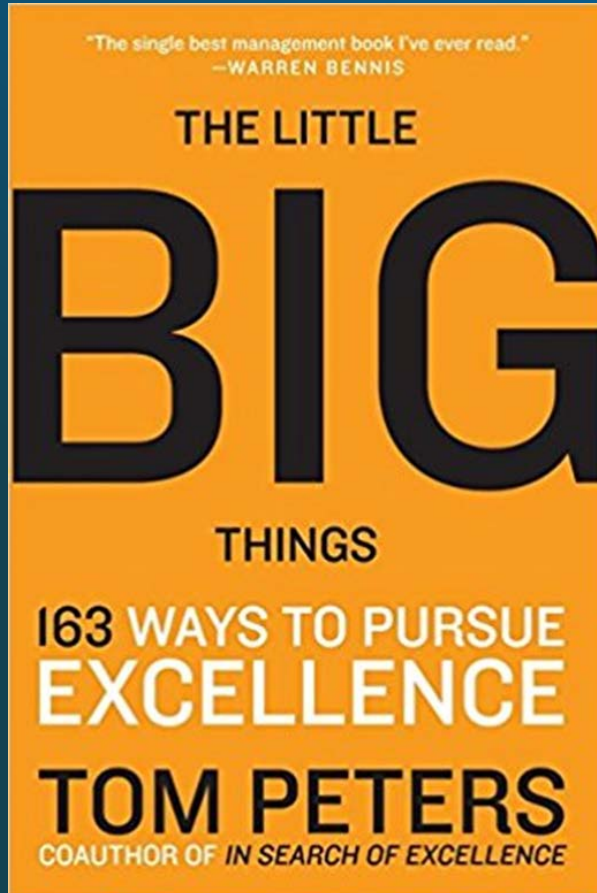

Kindness Is Free.

--Tom Peters



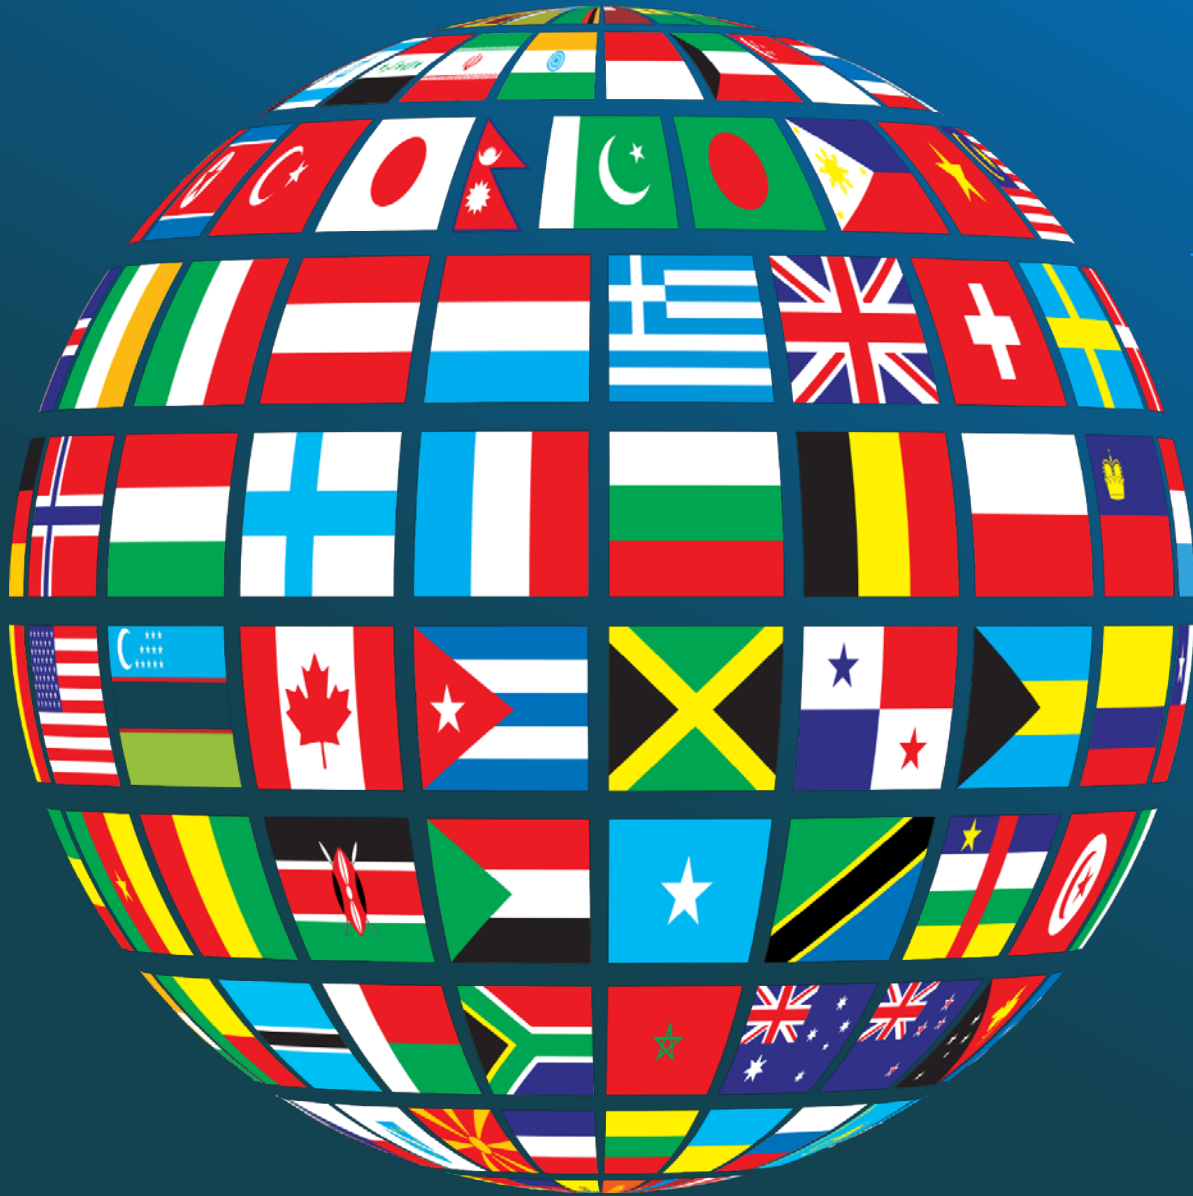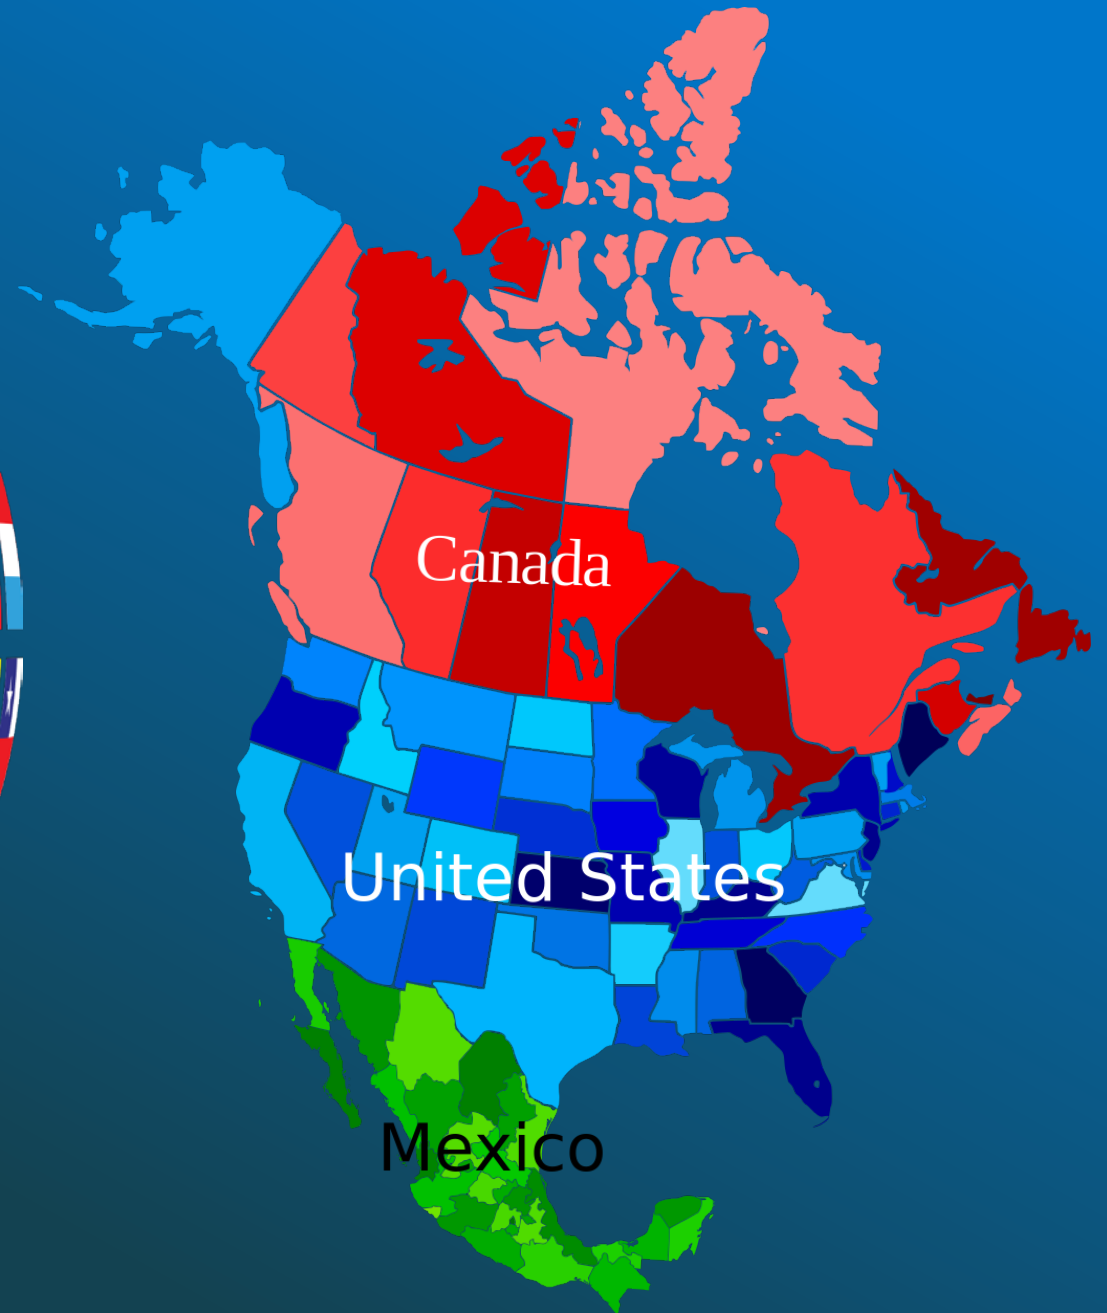

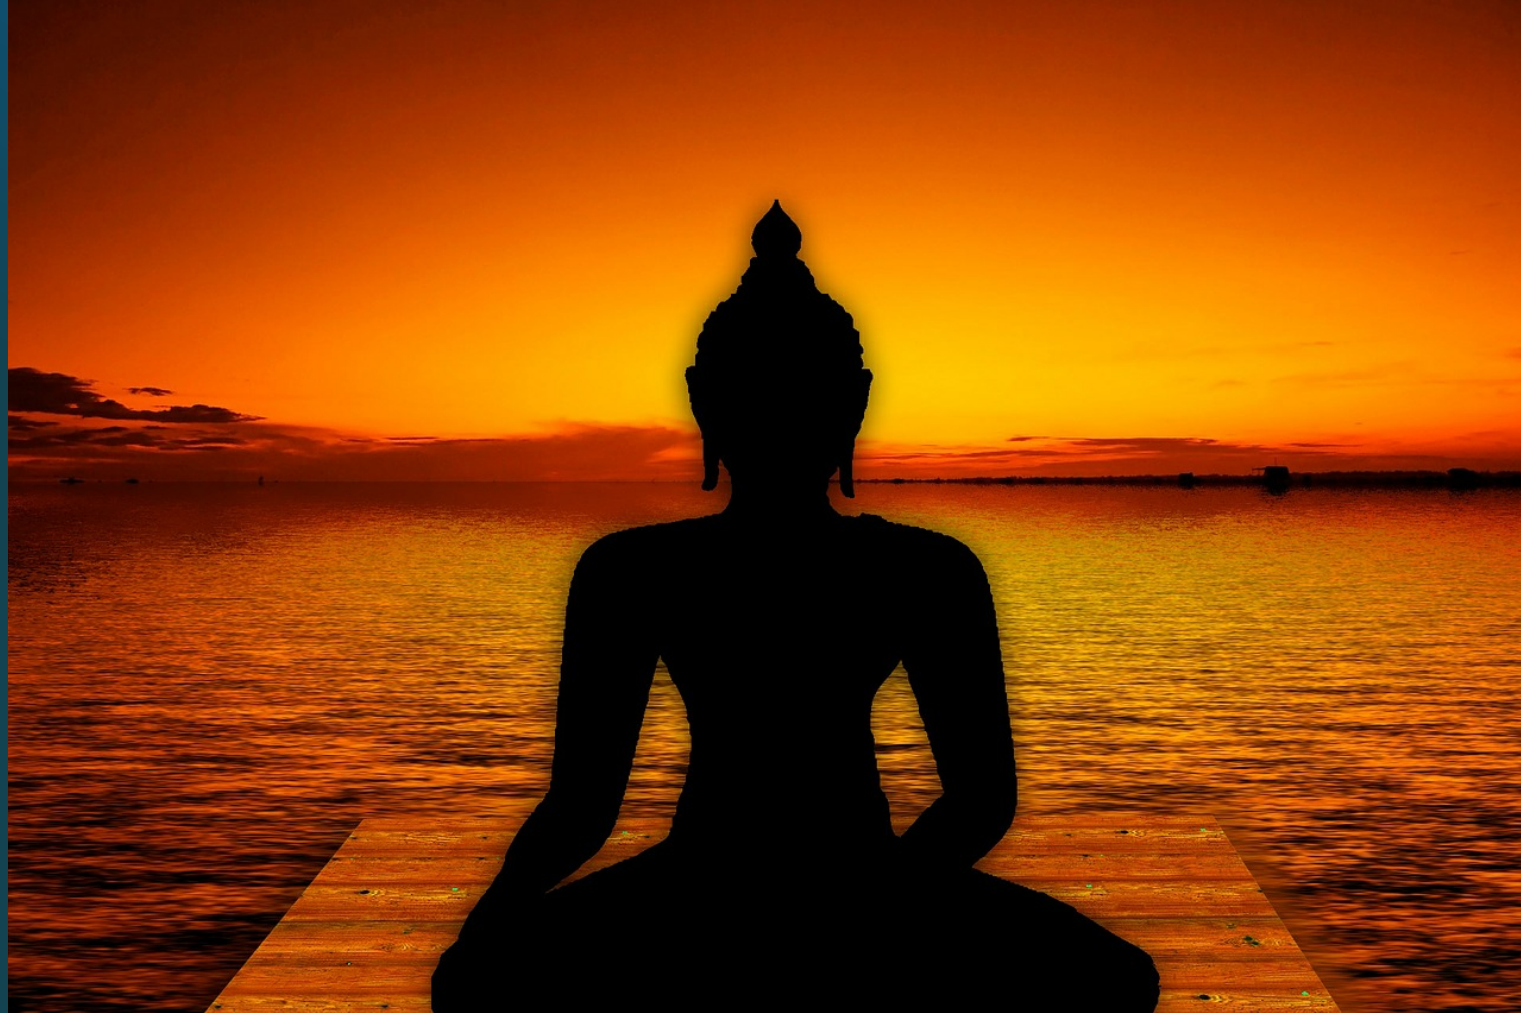

What we  
think, we  
become.

-- Buddha



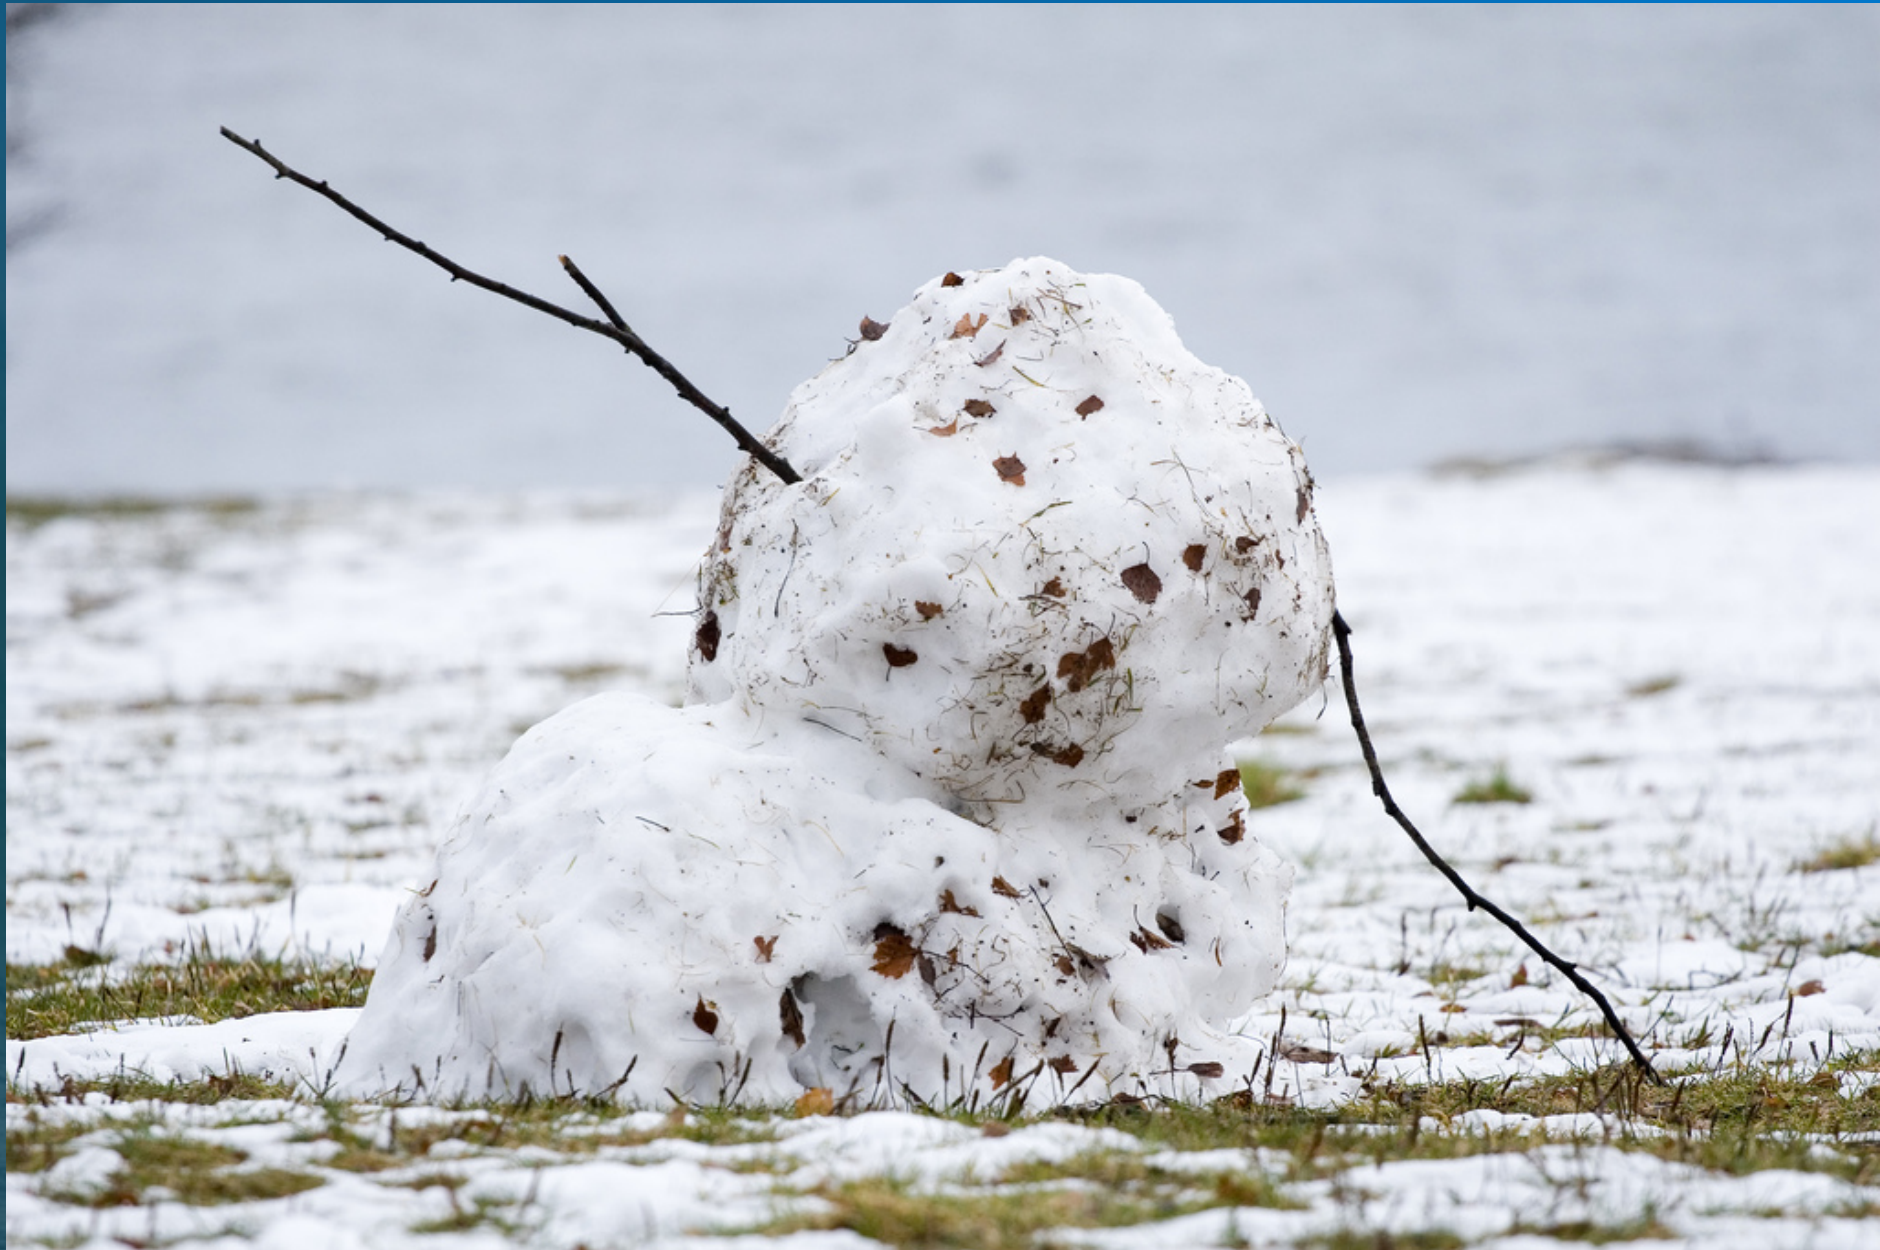

Photo by Andreas Åkre Solberg, 3/20/2007



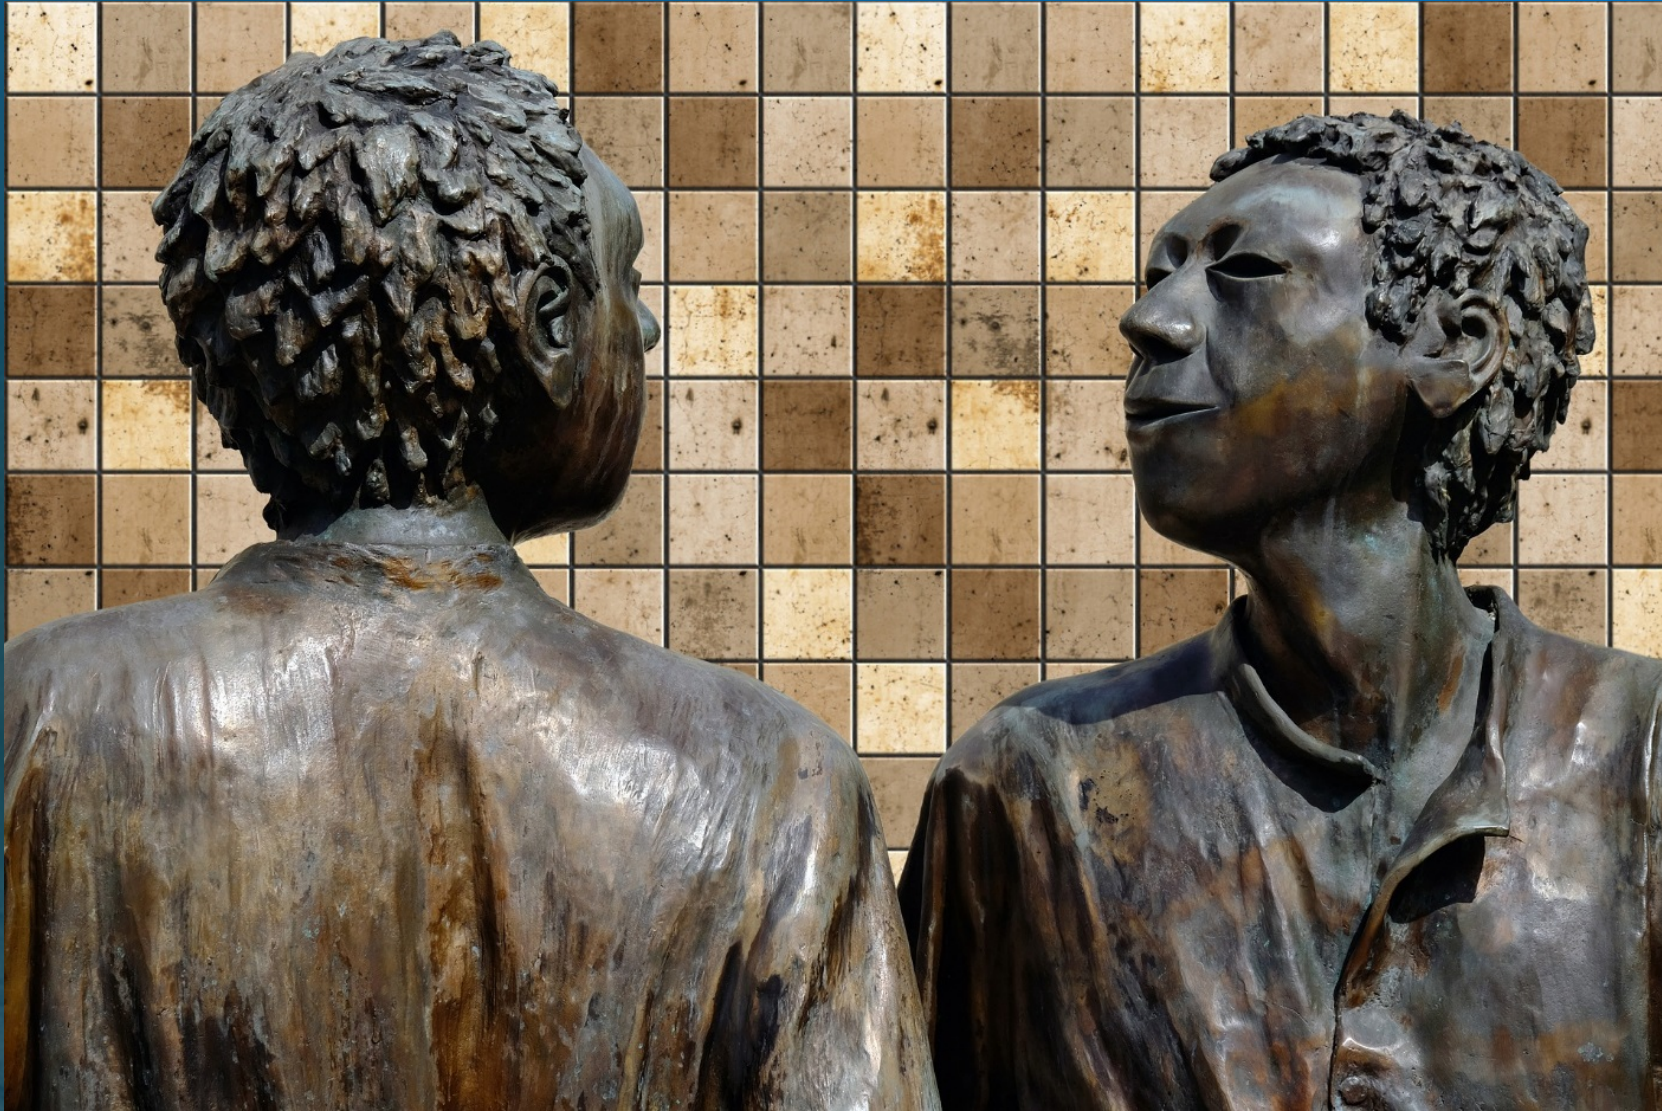







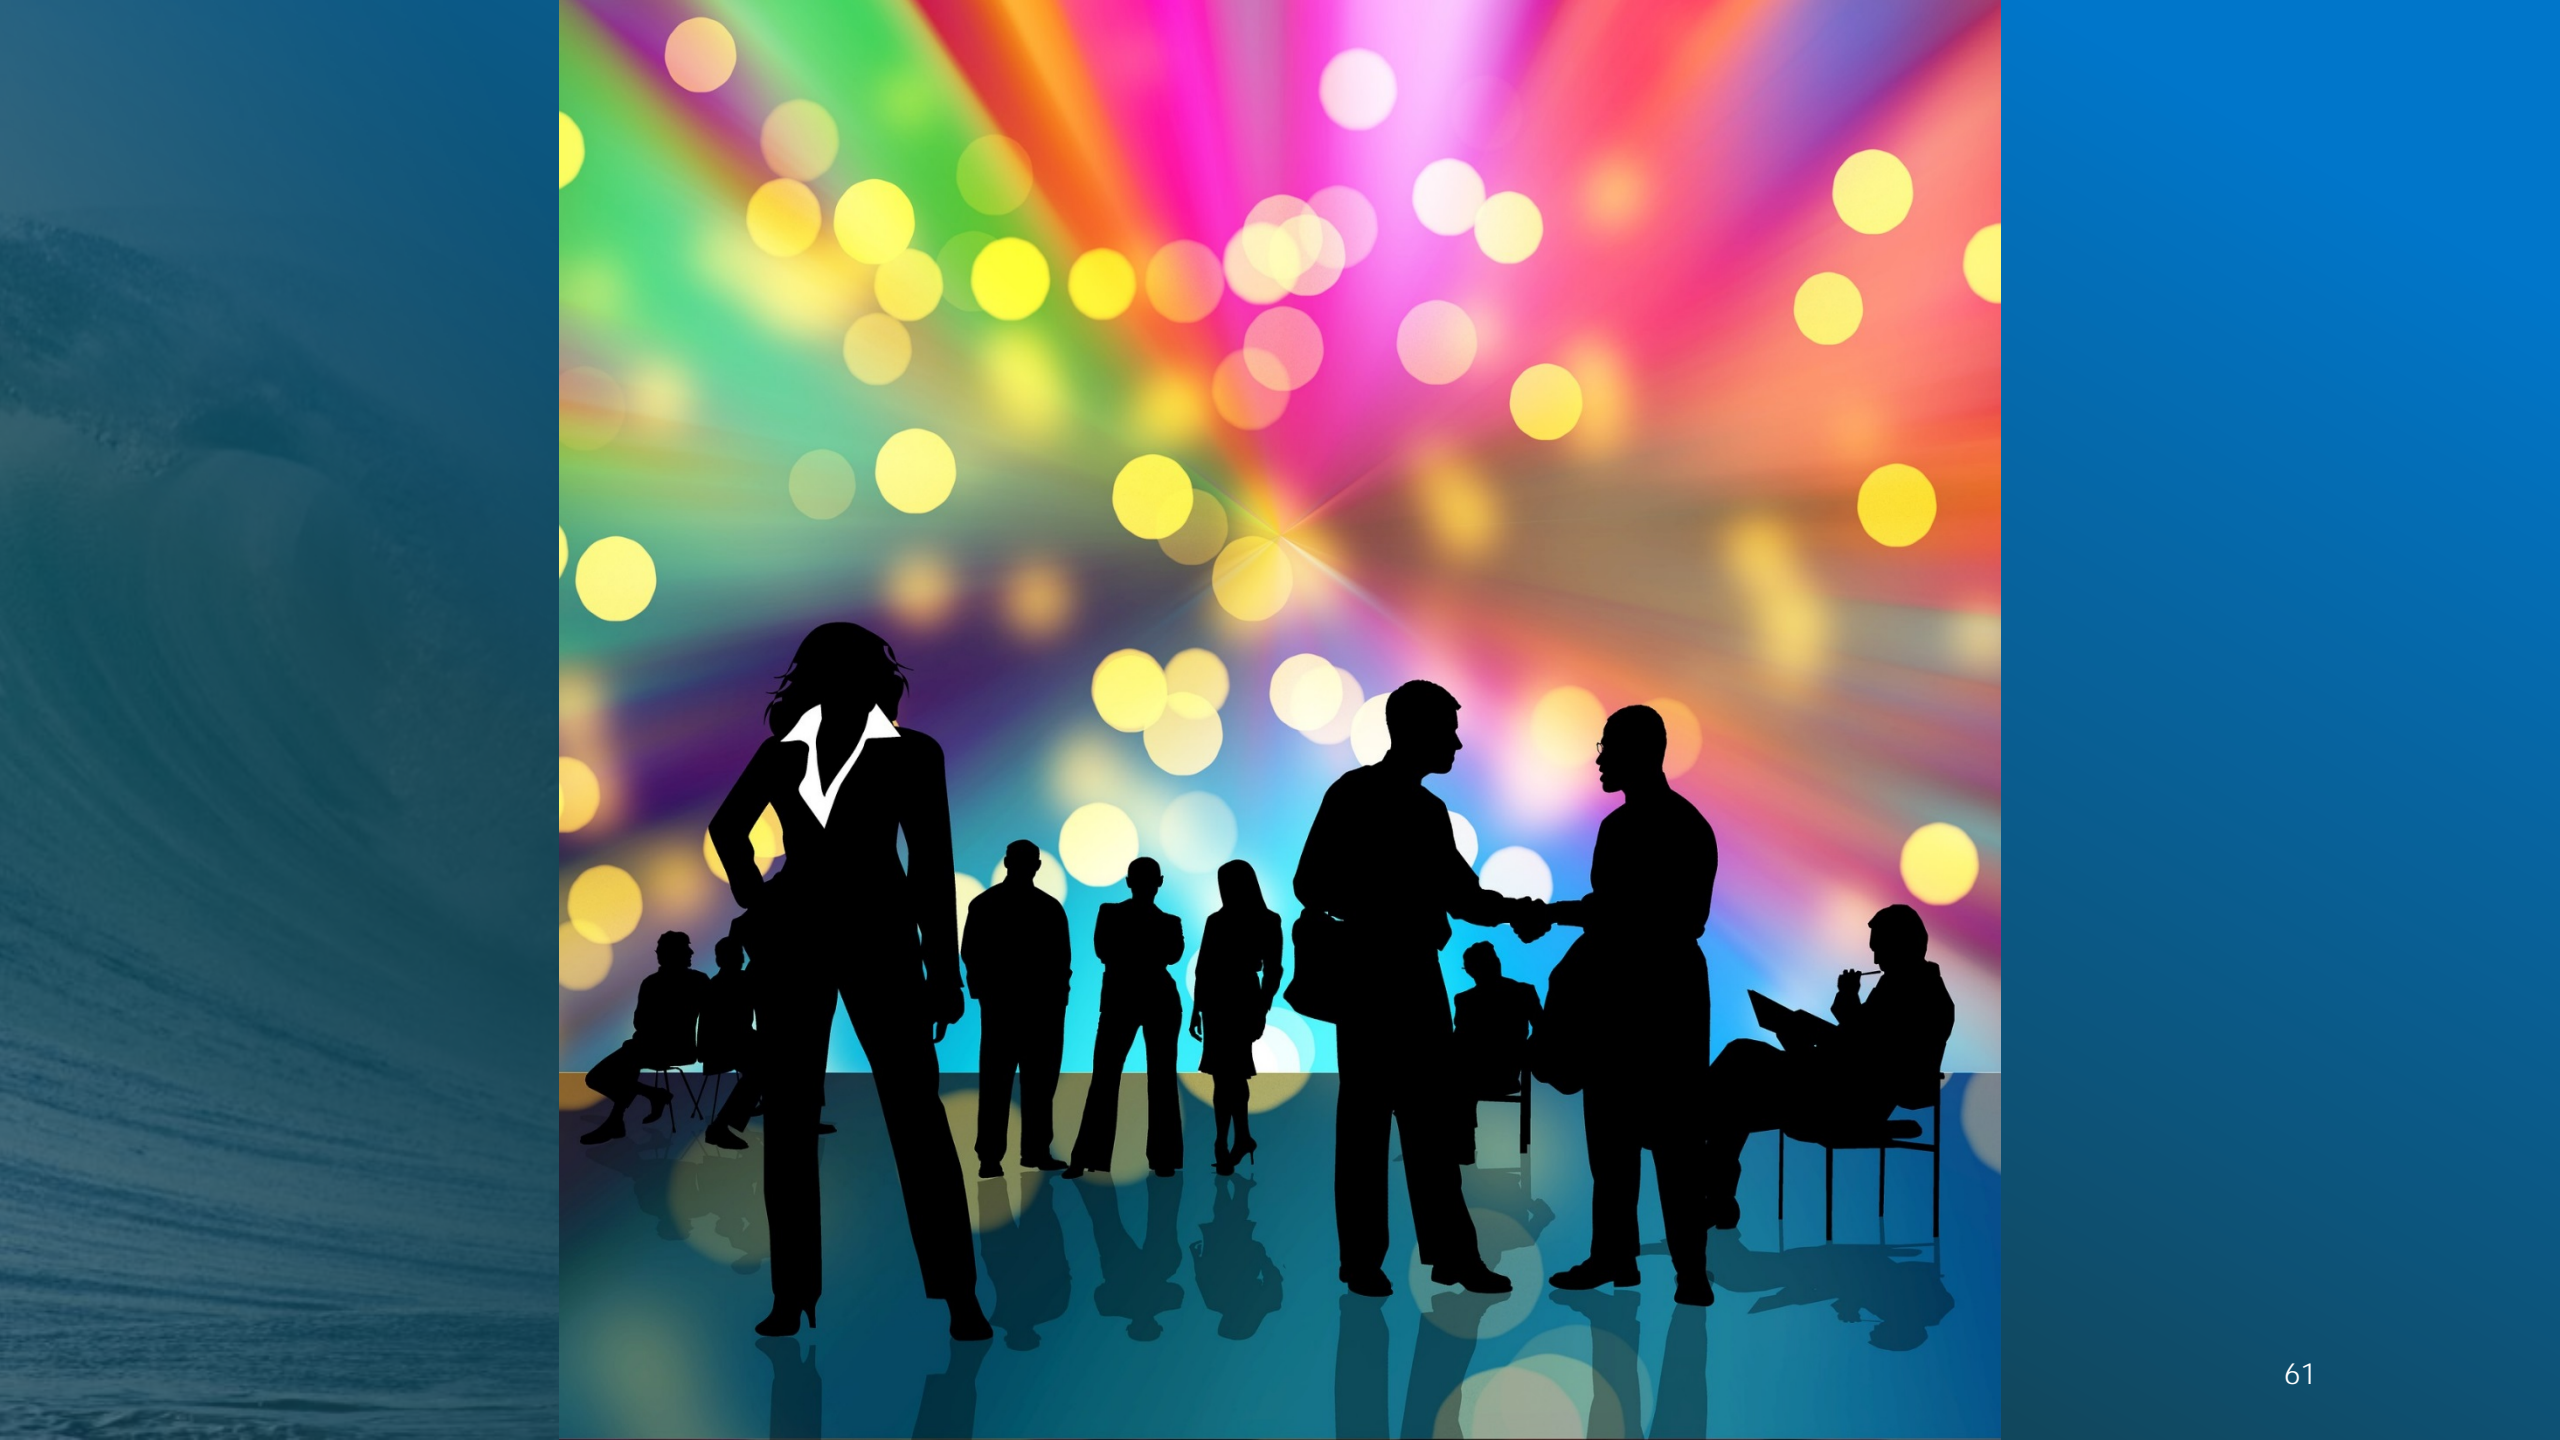



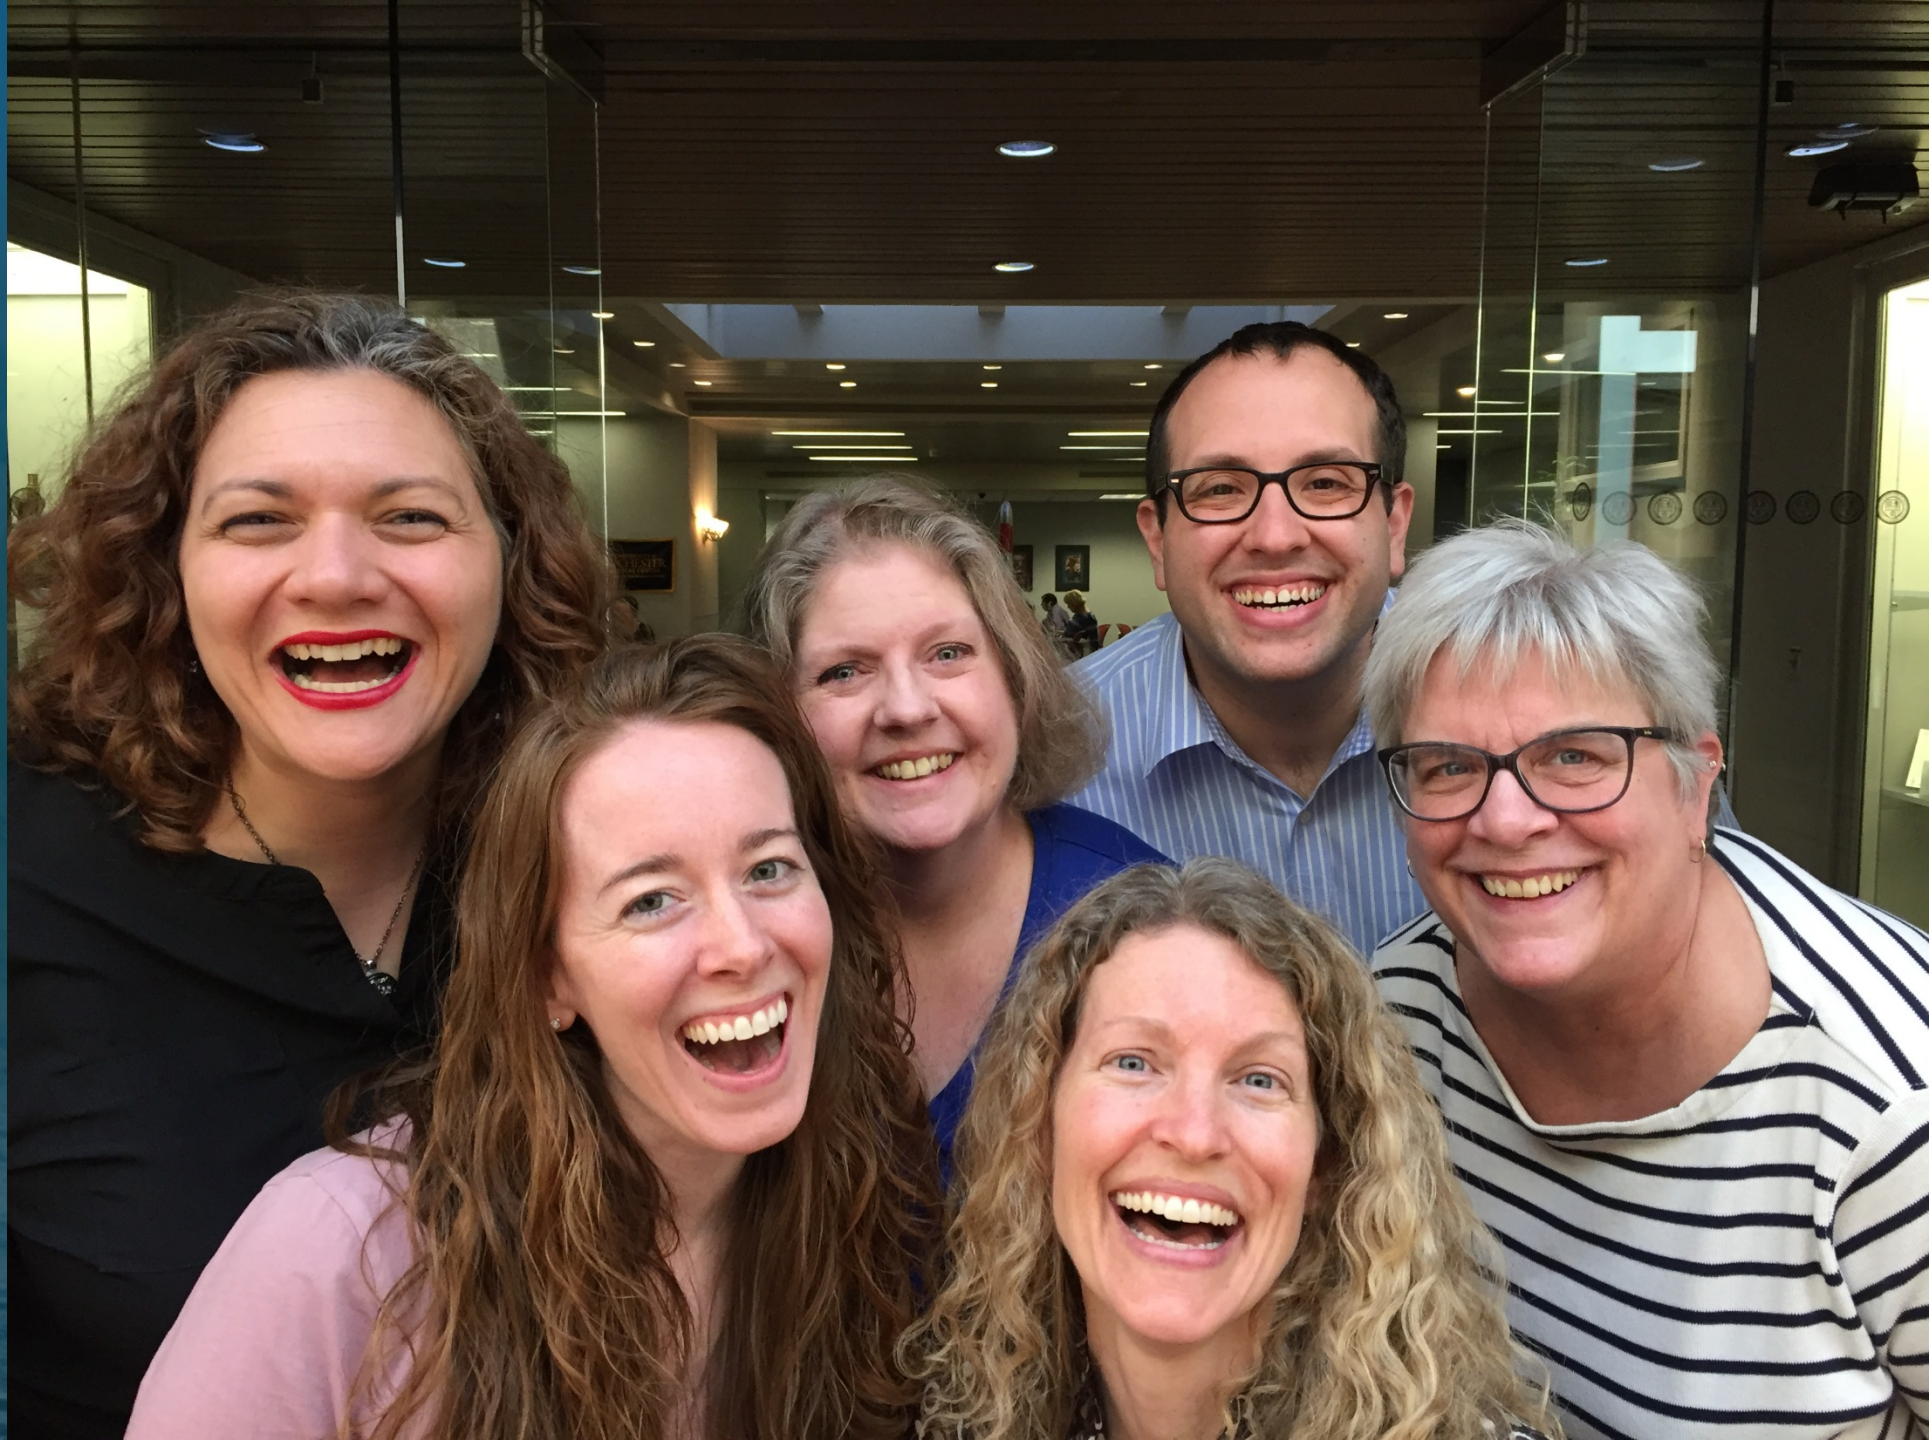



You can't always be right,  
but you can always be  
kind.

-- Robert J. Joynt, MD, PhD



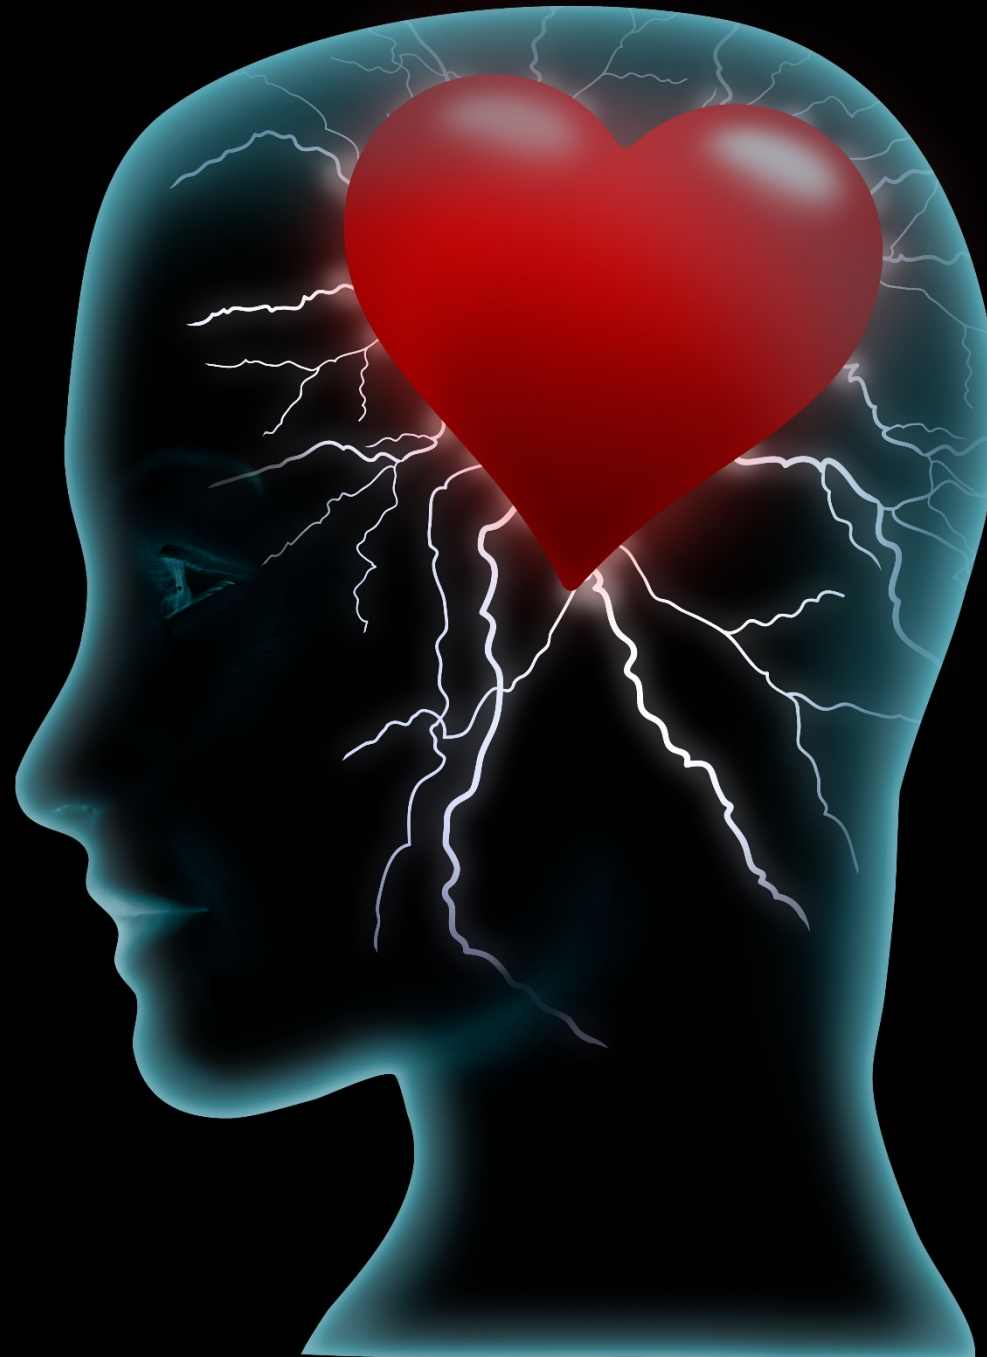



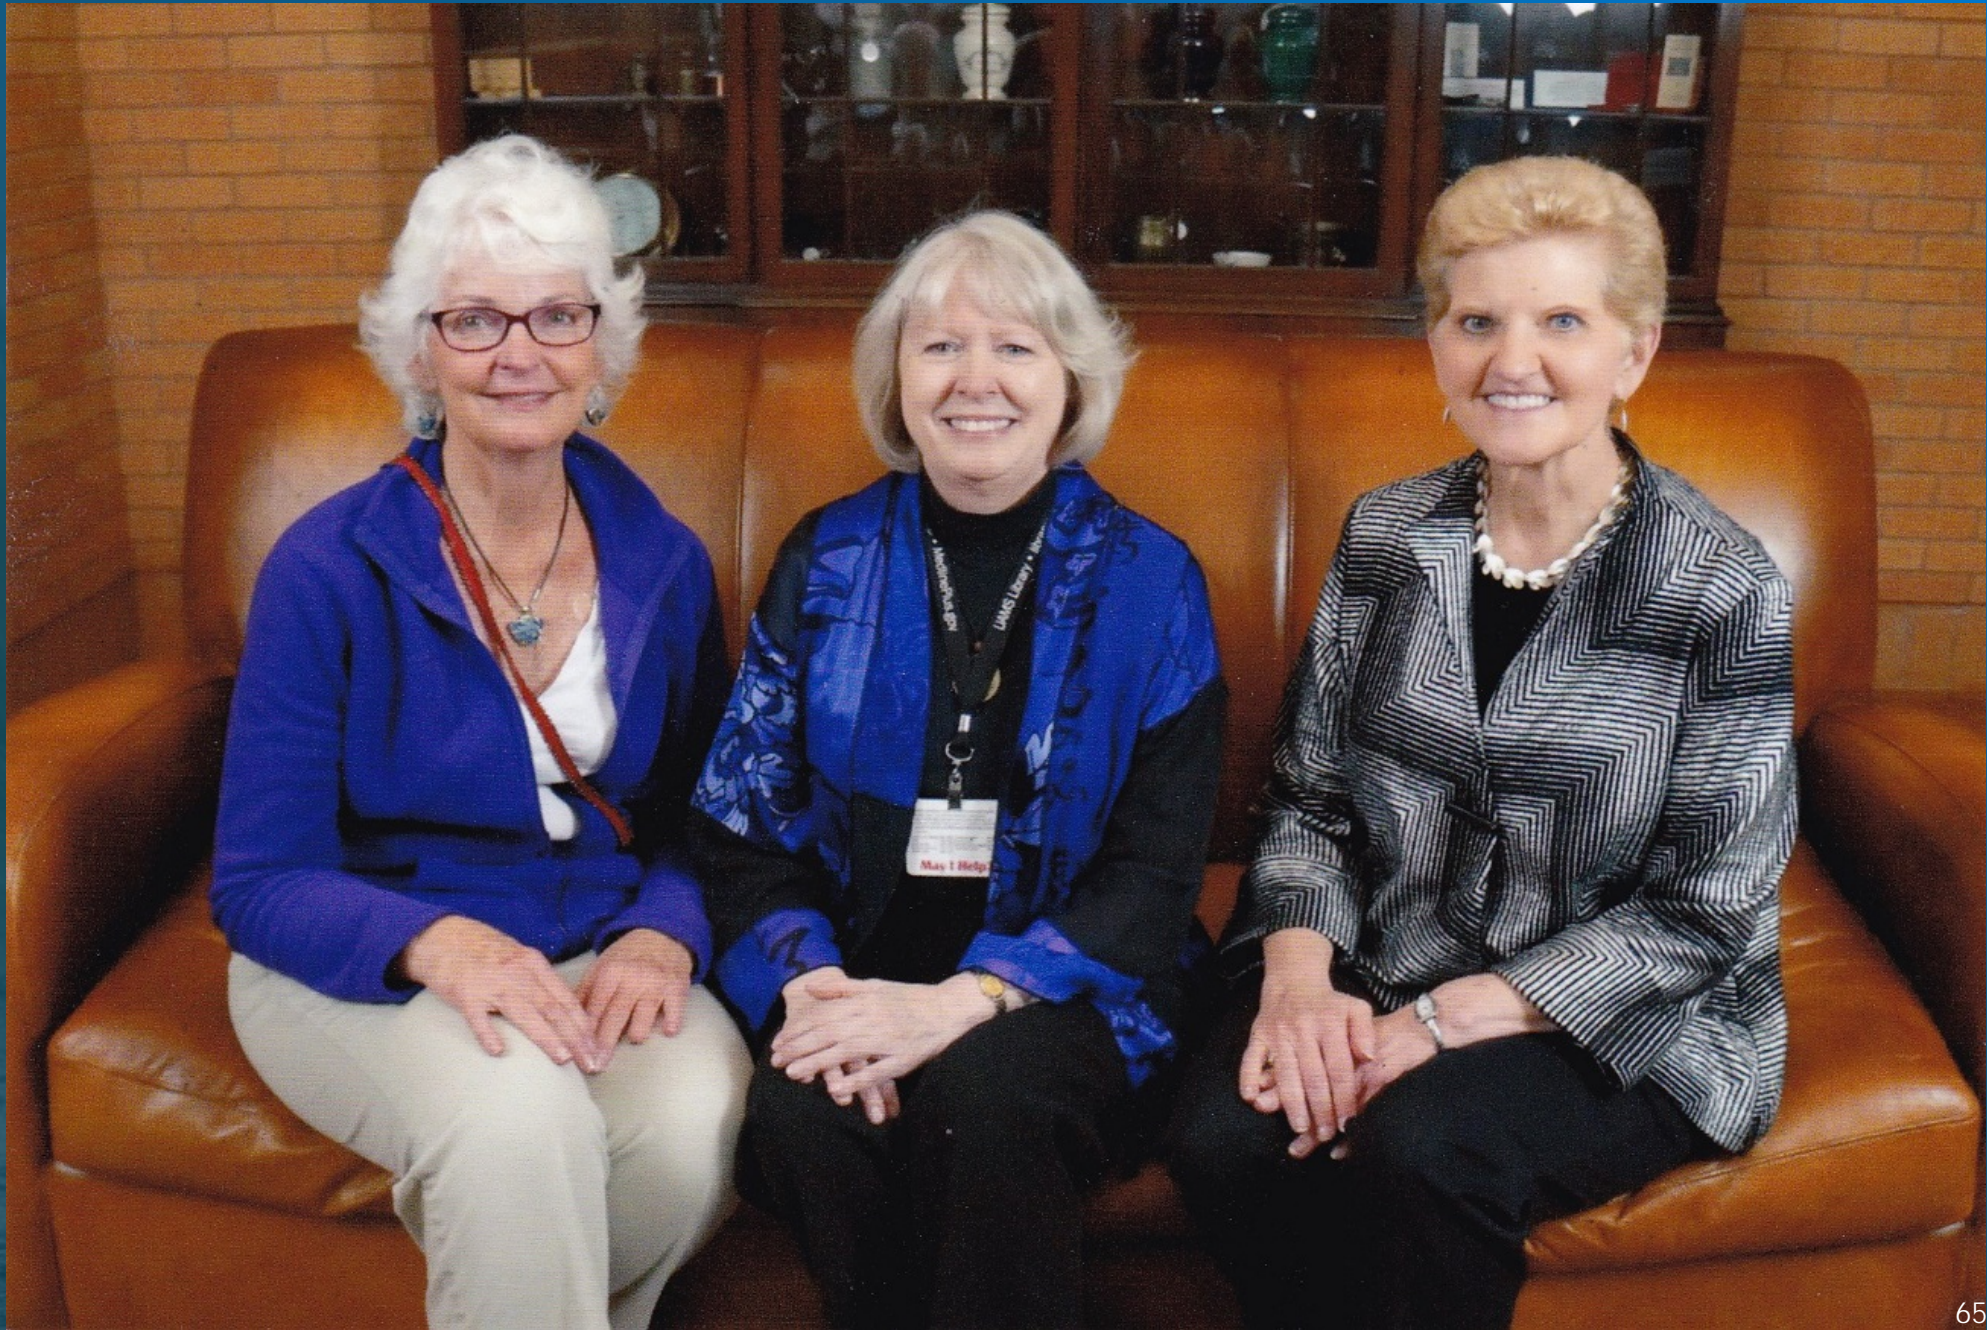



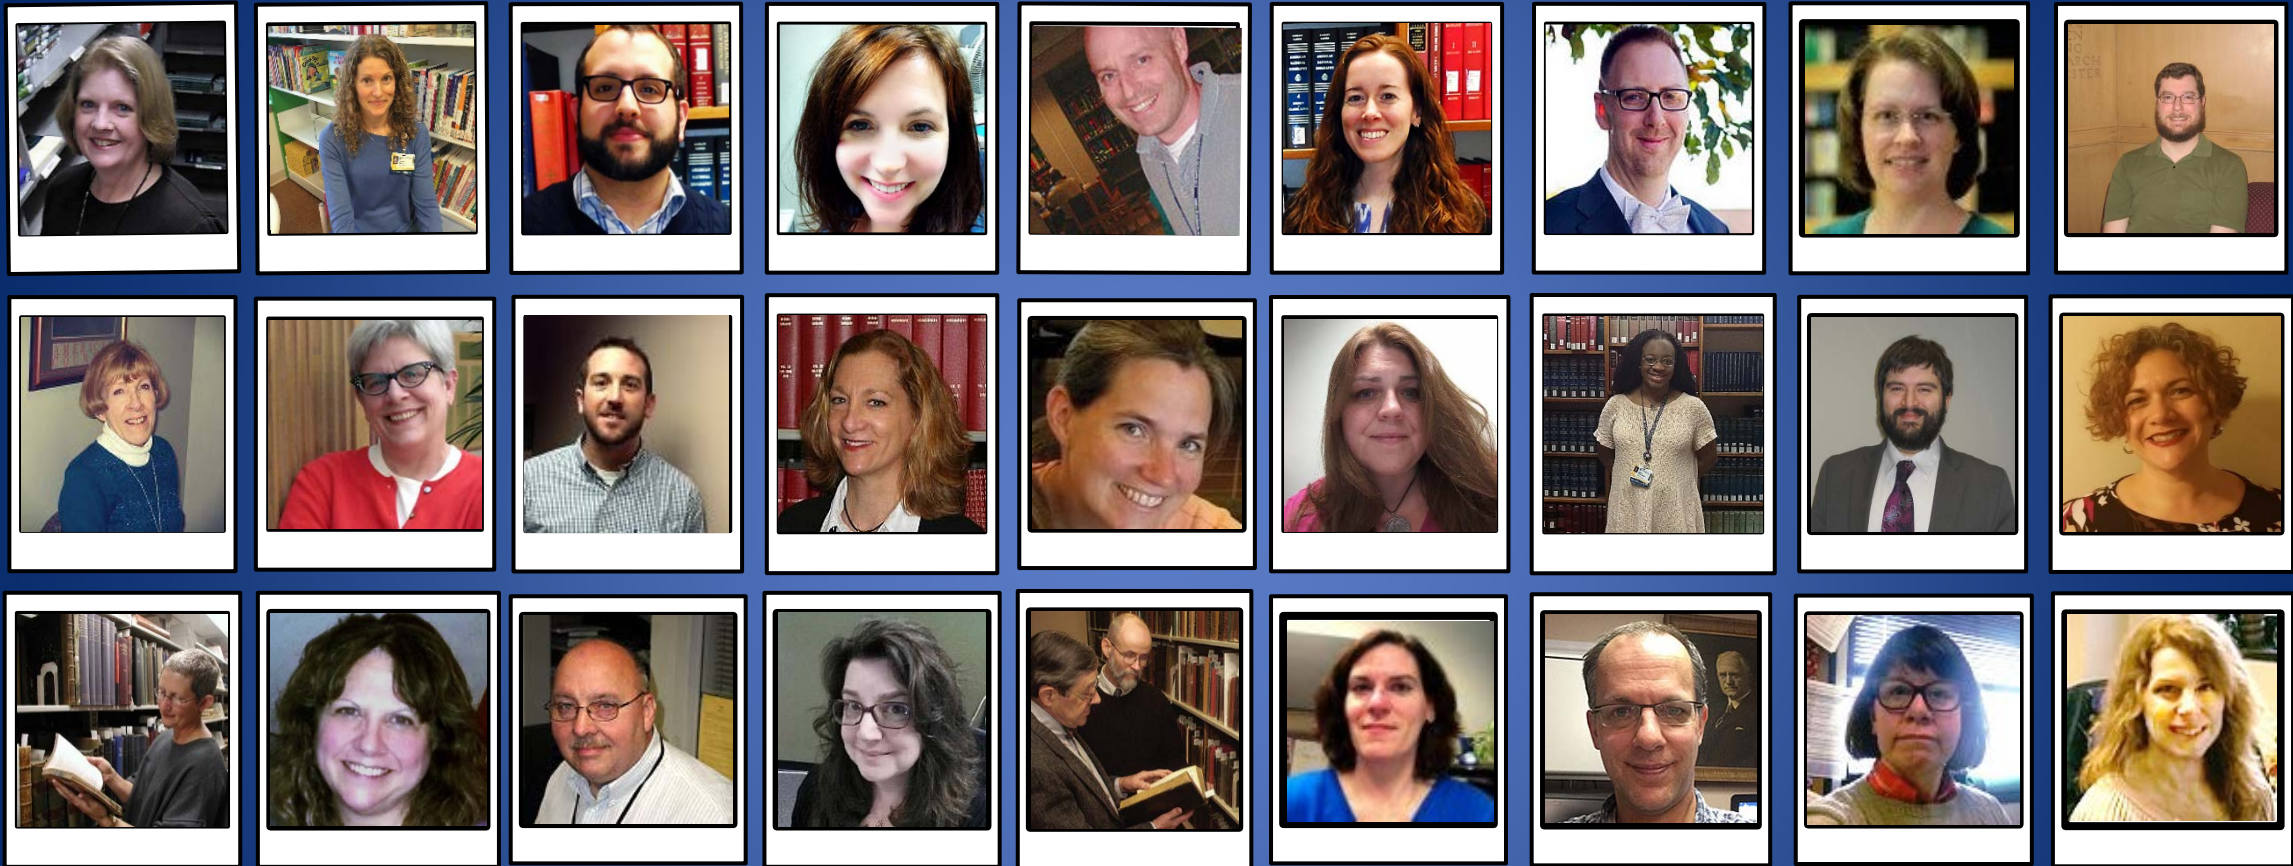



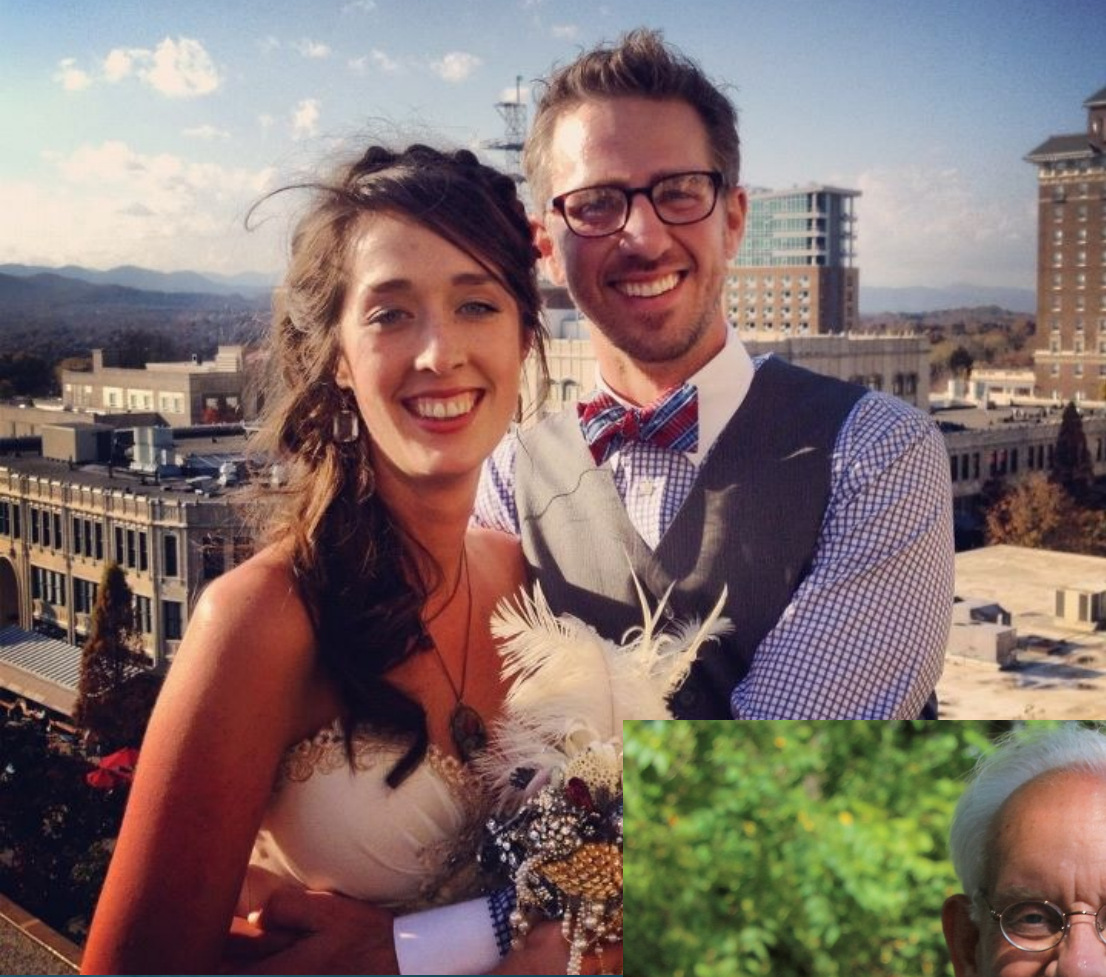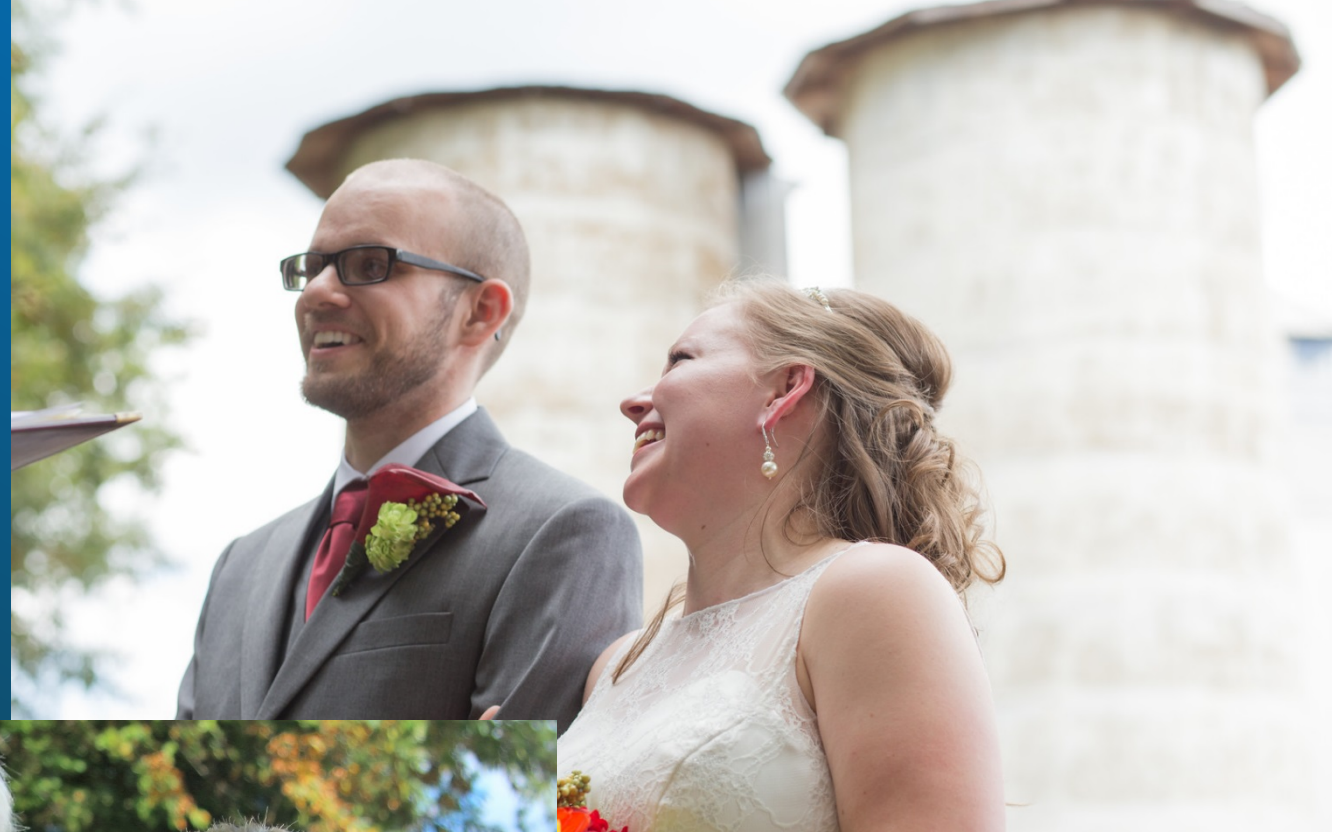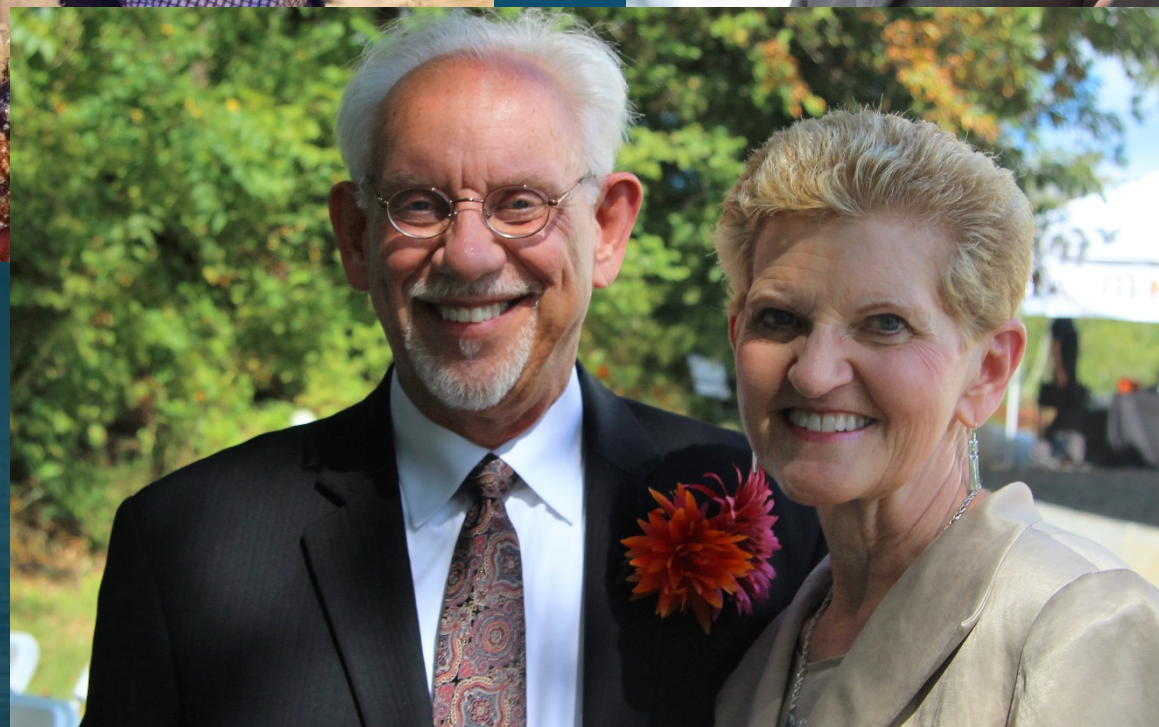



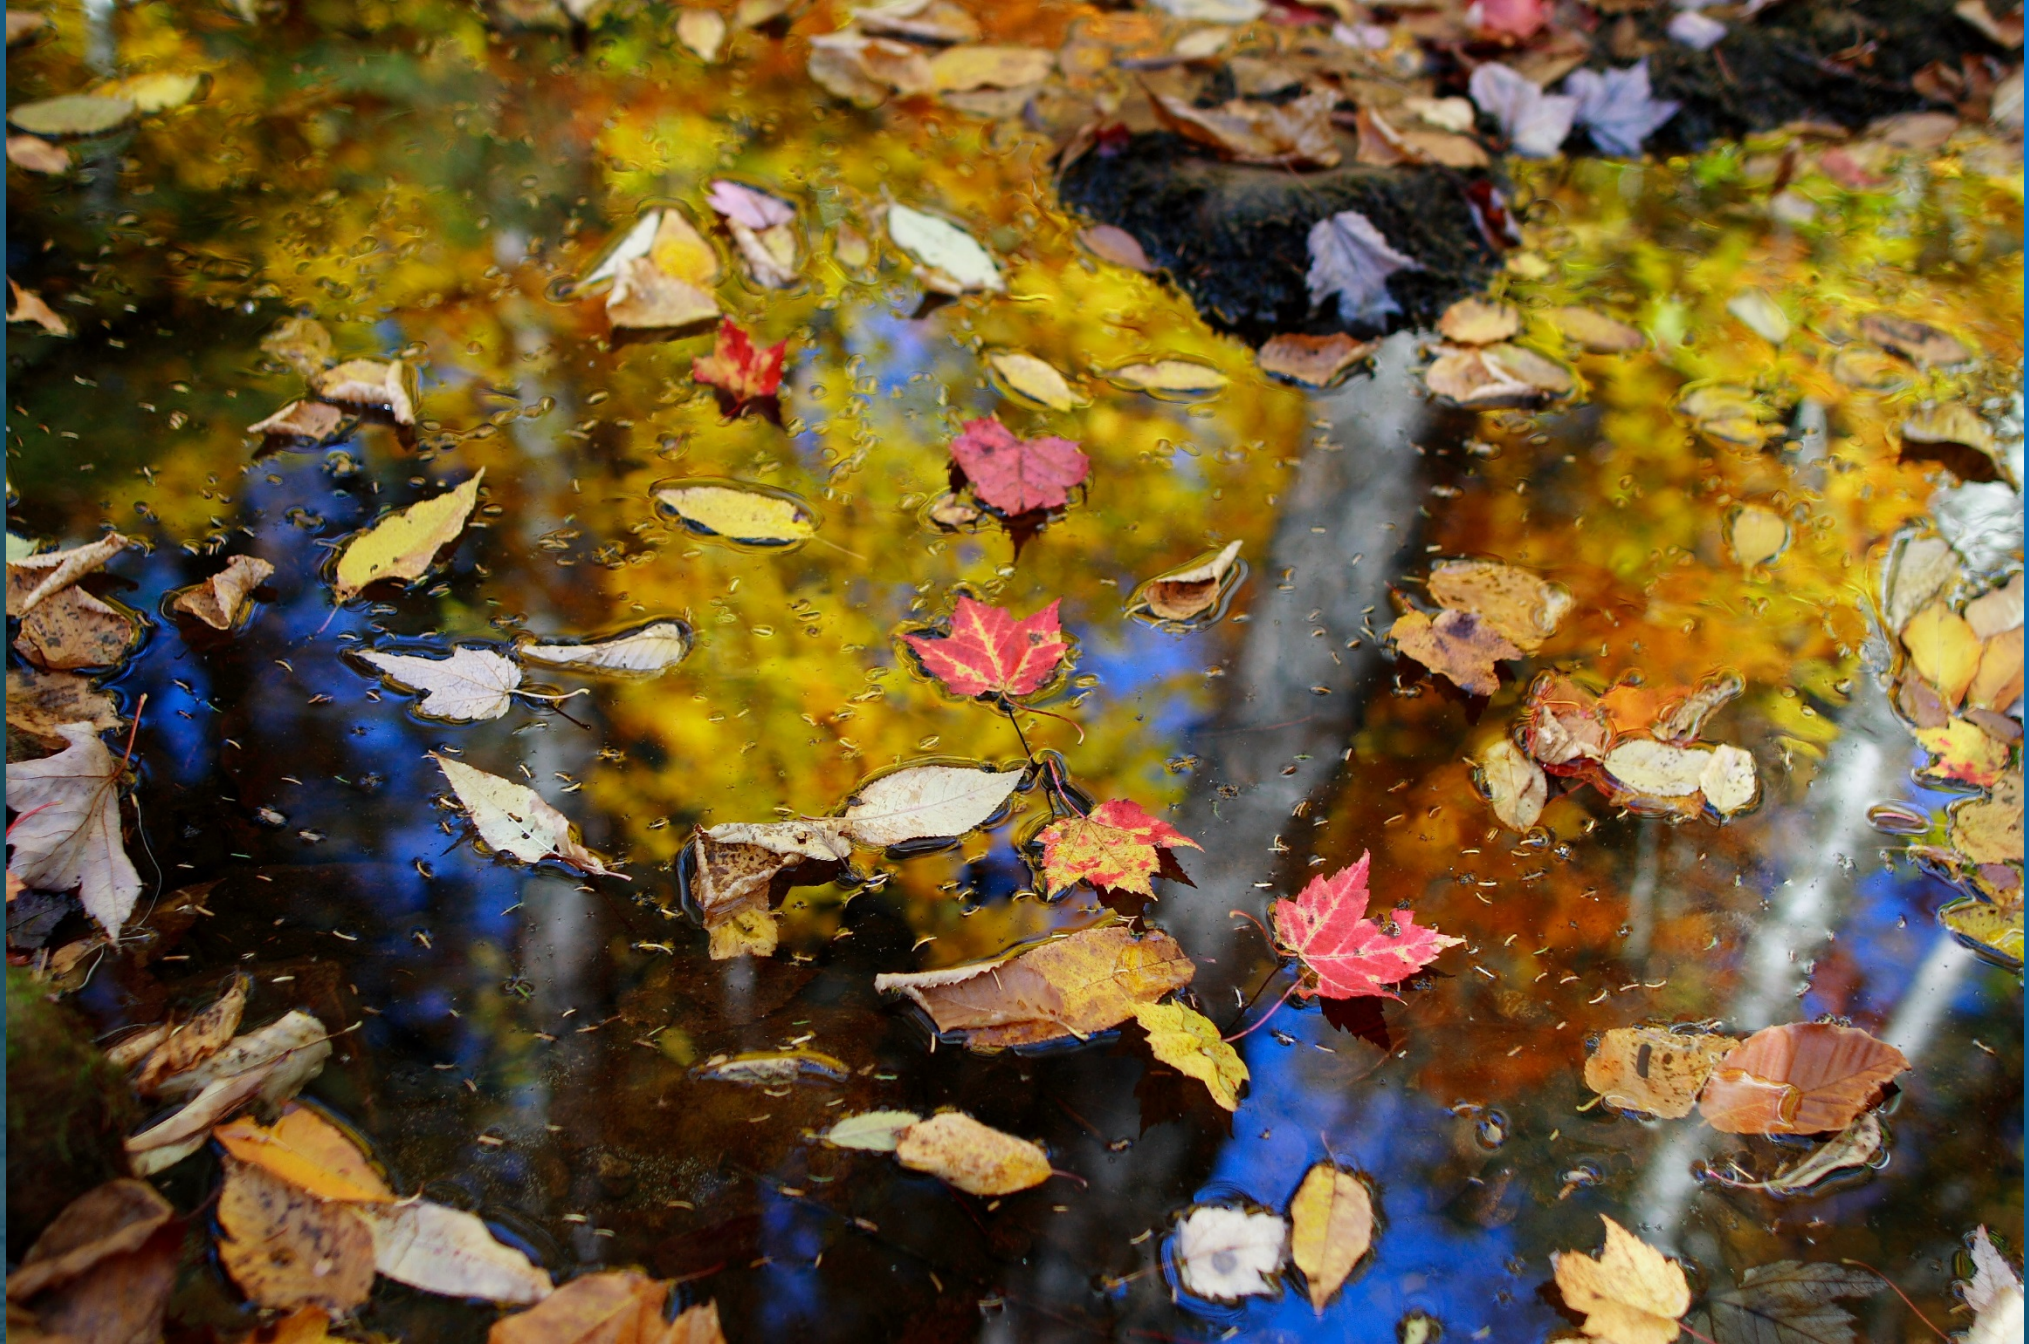

Supplement: jmla-106-283-s001.pdf [file jmla-106-283-s001.pdf]
